# Supplementary material for: Cognitive impairment and transcriptomic profile in hippocampus of young mice after multiple neonatal exposures to sevoflurane
Source: publisher site journal article supplement (doi:10.18632/aging.102326), 2019-10-03
Supplement: Supplementary file [file aging-v11i19-102326-supplementary-material-SD2.pdf]

**SUPPLEMENTARY TABLES**

**Supplementary Table 1. Primers specific to the top 20 up- and down-regulated DEGs.**

| <b>Gene</b>       | <b>Sequence (5'-3')</b>  | <b>Gene</b>      | <b>Sequence (5'-3')</b> |
|-------------------|--------------------------|------------------|-------------------------|
| Up-regulated      |                          | Down-regulated   |                         |
| Hist1h1c-F        | AAACTCAACAAGAAGGCGGC     | Sdf2l1-F         | GCTGCACTCACACGACATCA    |
| Hist1h1c-R        | CTTTAGACGCGCTCTTGACC     | Sdf2l1-1R        | TCCTGGTTGTTGGATAGCGG    |
| Fabp7-F           | TGATCCGGACACAATGCACA     | E130012A19Rik-1F | TCCTCAGGACTCTCCGACC     |
| Fabp7-R           | CCATCCAACCGAACCACAGA     | E130012A19Rik-1R | GCGGTTGAAATGTTCTGGC     |
| Neat1-F           | CCTGCTGTCTGCTGGCACTTG    | Gatsl2-F         | AGACCCCTGAGGACTACACC    |
| Neat1-R           | CGTCTCCATCAACTGCTGCTCTG  | Gatsl2-R         | ACACGGAGATGTTCTGGTCG    |
| Tbc1d32-F         | TGCTTCTCACCGAAAACCCAT    | Rims4-F          | GATGAGGACGCAGCAGACAG    |
| Tbc1d32-R         | AAGCAAGCTCATTTTCTGCACC   | Rims4-R          | CTCCTGCAAGCCAATCTCCA    |
| Klf10-F           | CTCAACTTCGGCGCTTCTCT     | Doc2a-F          | ATGAGGACAAGCTGAGCCAC    |
| Klf10-R           | CTCTGCTCAGCTTTGTCCCA     | Doc2a-R          | CCGCAGACATTGAAGAGGGT    |
| Mt2-F             | CGCCTGCAAATGCAAACAATG    | Klf4-F           | TACCCCTACACTGAGTCCCG    |
| Mt2-R             | TCGGAAGCCTCTTTGCAGAT     | Klf4-R           | GGAAAGGAGGGTAGTTGGGC    |
| Fbn1-F            | GTGCAACTGGAAACGGGAAC     | Efh2-F           | ACCCCTACACCGAGTTCAAG    |
| Fbn1-R            | GCGGGCAAATGCATCTGTAG     | Efh2-R           | TCAGGTCGATGAAGCCATCC    |
| Ccbe1-F           | ACACGTGGACCTACCGAGAG     | Ccdc184-F        | ACGGCGGTATGAAGGAACTG    |
| Ccbe1-R           | CGCCCCGAAGACTTCAGACAT    | Ccdc184-R        | ACAGAACCTGGATGTGCGAG    |
| Prkg1-F           | GGACGCAGAAGCAAAAAGCAA    | Stx1a-1F         | ACCCCGATGAGAGCATTGAG    |
| Prkg1-R           | ACTCGTCCGAAACCTCCAAC     | Stx1a-1R         | TTTGCAGCGTTCTCGGTAGT    |
| Pm20d2-F          | CCGAGCACGATGTGACTGT      | Sox18-1F         | CCTTCTTCCCACCGCCTTT     |
| Pm20d2-R          | GGGCGCACGGAAGTAATAGA     | Sox18-1R         | GGTGGTGACAGAGGATTGGG    |
| H3f3b-F           | AAGAAGCCTCACCGCTACAG     | Nr2f1-F          | AGCGTCCGCAGGAACTTAAC    |
| H3f3b-R           | GTGACTCTCTTGGCGTGGAT     | Nr2f1-R          | TTCTTCTCGCTGAACCGC      |
| Sle30a1-F         | TGGAAGCGGAAGACAACAGG     | Cit-F            | TTCTGACGGGGACGTATCT     |
| Sle30a1-R         | AGACCAAGGCATTACGACC      | Cit-R            | GTCATCGCCCTCCAGTTTCA    |
| Cntnap5c-F        | AGATTTACTCAGGCAATGTCACCT | 9430020K01Rik-F  | GAAGGGGGAGTCCACAACAG    |
| Cntnap5c-R        | GGGGGTACCAGTCAACAGC      | 9430020K01Rik-R  | TCTAGTTCCTGGAGAGCCC     |
| Ddo isoform 1-F   | ACAGTGTGTATTGCGGTCGT     | Kenab3-F         | ATGCAGGTGTCTATCGCGTG    |
| Ddo isoform 1-R   | GTACCGGGGTATCTGCACAC     | Kenab3-R         | CCAGGTACCAAGGCCAAGAC    |
| Mthfr isoform a F | CCAGCTGGGCACTGTTATCC     | Lasp1-F          | CCCAAGCAGTCTTCACCAT     |
| Mthfr isoform a R | AGTCCATTCTGCGCCTCATC     | Lasp1-R          | CCACCACGCTGAAACCTTTG    |
| Cfap44-F          | TAAGAGCAGCAGCAAGCAGT     | Cacna1i-F        | GGCTGGACAGCGTCTCTTTA    |
| Cfap44-R          | CATAATCTCCAGCTCCGCGT     | Cacna1i-R        | CTCACCCCTTGCTCTCCTTGG   |
| Mat2a-F           | AGCTGCTTATGCTGCTCGTT     | Fosl2-F          | CGGGAACCTTGACACCTCGT    |
| Mat2a-R           | TCAGATCCAGATCCCTGACAA    | Fosl2-R          | GGTGATGGCGTTGATTGTGG    |
| Zkscan8-F         | CACTGCAGGGTTCCAGACTT     | Pdia6-F          | CGTACTGCCTCACATCCTGG    |
| Zkscan8-R         | TGGCTGGATTCCGGGAGATA     | Pdia6-R          | GGTACCCGAACCCTCCAATC    |
| Cfap69-F          | GGATGGGGAGATGCAGGGTA     | Xbp1-F           | CTGAGTCCGCAGCAGGTG      |
| Cfap69-R          | GGTTCTACAAAACAGGGCTGC    | Xbp1-R           | AGGGAGGCTGGTAAGGAACT    |
| Sc130a10-F        | CTGCTCTCGGACTCGTTCAA     | Pgr1-F           | ATCTGGCTGTCACTATGGCG    |
| Sc130a10-R        | GCCTCCACGAAGATGGTGAA     | Pgr1-R           | TGCCAGCCTGACAACACTTT    |

**Supplementary Table 2. All up-regulated DEGs.**

| AccID         | log2FC     | Pvalue     | Style | AX3HiP1 | AX3HiP6 | AX3HiP7 | C1HiP | C2HiP | C3HiP |
|---------------|------------|------------|-------|---------|---------|---------|-------|-------|-------|
| Hist1h1c      | 1.31267581 | 5.32E-10   | up    | 210     | 312     | 310     | 117   | 104   | 93    |
| Fabp7         | 0.85361146 | 9.19E-08   | up    | 510     | 585     | 626     | 287   | 348   | 263   |
| Neat1         | 0.83695367 | 6.96E-07   | up    | 2066    | 2703    | 3017    | 1280  | 1266  | 1470  |
| Tbc1d32       | 0.86251088 | 7.10E-07   | up    | 334     | 349     | 397     | 176   | 215   | 168   |
| Klf10         | 0.84394199 | 1.46E-06   | up    | 355     | 541     | 655     | 292   | 258   | 246   |
| Mt2           | 0.79661629 | 1.74E-06   | up    | 1721    | 2239    | 1968    | 1144  | 1201  | 913   |
| Fbn1          | 0.75822236 | 6.25E-06   | up    | 347     | 473     | 629     | 261   | 262   | 261   |
| Ccbe1         | 0.81554074 | 1.23E-05   | up    | 547     | 680     | 968     | 428   | 309   | 398   |
| Prkg1         | 0.59114627 | 2.20E-05   | up    | 351     | 358     | 508     | 279   | 248   | 223   |
| Pm20d2        | 0.53770463 | 9.04E-05   | up    | 334     | 399     | 545     | 283   | 289   | 242   |
| H3f3b         | 0.3420804  | 0.00010199 | up    | 3285    | 3577    | 4474    | 2977  | 2899  | 2479  |
| Slc30a1       | 0.45620874 | 0.00010528 | up    | 659     | 805     | 1034    | 589   | 632   | 473   |
| Cntnap5c      | 0.63716696 | 0.00011373 | up    | 335     | 377     | 429     | 277   | 222   | 192   |
| Ddo           | 1.02095372 | 0.00013425 | up    | 106     | 193     | 259     | 84    | 83    | 82    |
| Mthfr         | 0.41618347 | 0.00014103 | up    | 879     | 847     | 1227    | 754   | 695   | 608   |
| Cfap44        | 1.38749371 | 0.00016006 | up    | 233     | 474     | 629     | 91    | 136   | 218   |
| Mat2a         | 0.40471043 | 0.00017422 | up    | 3246    | 3280    | 3948    | 2675  | 2721  | 2074  |
| Zkscan8       | 0.52475543 | 0.00017509 | up    | 575     | 553     | 673     | 427   | 427   | 328   |
| Cfap69        | 0.72324972 | 0.00026348 | up    | 349     | 370     | 376     | 187   | 241   | 199   |
| Slc30a10      | 0.47424661 | 0.00028382 | up    | 475     | 495     | 709     | 372   | 436   | 315   |
| Nphp3         | 0.67949682 | 0.00029212 | up    | 294     | 270     | 318     | 181   | 203   | 139   |
| Ghr           | 0.76690226 | 0.00032131 | up    | 156     | 214     | 288     | 119   | 111   | 123   |
| Zfp110        | 0.71562975 | 0.0003606  | up    | 239     | 315     | 373     | 164   | 166   | 189   |
| Rev3l         | 0.41260455 | 0.00036542 | up    | 1385    | 1376    | 1726    | 1142  | 1045  | 969   |
| Ccdc37        | 0.66879606 | 0.00038    | up    | 168     | 184     | 270     | 115   | 129   | 116   |
| Nsun7         | 0.55639805 | 0.00045858 | up    | 308     | 307     | 381     | 226   | 241   | 171   |
| Traf3ip2      | 0.70853818 | 0.00048953 | up    | 295     | 242     | 292     | 181   | 169   | 133   |
| Ubxn11        | 0.53699635 | 0.00052979 | up    | 257     | 327     | 431     | 224   | 225   | 197   |
| Lactb2        | 0.68114467 | 0.00059208 | up    | 240     | 243     | 257     | 146   | 153   | 137   |
| Col6a4        | 2.00241304 | 0.00062403 | up    | 34      | 188     | 251     | 46    | 14    | 42    |
| Slc22a4       | 0.65031318 | 0.00063502 | up    | 150     | 160     | 230     | 119   | 116   | 85    |
| Dsp           | 0.49510796 | 0.00064136 | up    | 580     | 692     | 946     | 602   | 460   | 399   |
| Adams3        | 0.40837859 | 0.0006738  | up    | 548     | 564     | 813     | 465   | 458   | 418   |
| Gm15446       | 0.89449855 | 0.00068508 | up    | 177     | 154     | 152     | 86    | 82    | 80    |
| A430105I19Rik | 0.55366746 | 0.00071236 | up    | 216     | 221     | 306     | 162   | 164   | 144   |
| Vwa3a         | 0.96074599 | 0.00079566 | up    | 209     | 400     | 422     | 149   | 132   | 198   |
| Zdhhc20       | 0.3640428  | 0.00080315 | up    | 1019    | 1053    | 1309    | 893   | 852   | 718   |
| Zfp941        | 0.60698307 | 0.00080663 | up    | 346     | 448     | 495     | 230   | 305   | 253   |
| Xlr3b         | 1.51243311 | 0.00084254 | up    | 205     | 114     | 107     | 27    | 76    | 44    |
| Kctd4         | 0.45136281 | 0.00091241 | up    | 1069    | 1161    | 1235    | 846   | 833   | 716   |
| Col25a1       | 0.54664464 | 0.0009775  | up    | 1535    | 1889    | 3386    | 1367  | 1475  | 1341  |
| Vprbp         | 0.37143641 | 0.00100464 | up    | 689     | 757     | 935     | 632   | 605   | 487   |
| Dcc           | 0.48492321 | 0.00101956 | up    | 881     | 747     | 1284    | 769   | 655   | 509   |
| Shtn1         | 0.4176569  | 0.00112328 | up    | 732     | 812     | 1026    | 643   | 567   | 576   |
| Tex9          | 0.73468468 | 0.00115775 | up    | 131     | 206     | 214     | 109   | 103   | 96    |
| Zkscan16      | 0.47956129 | 0.00116363 | up    | 920     | 778     | 1004    | 679   | 645   | 511   |
| A730017C20Rik | 0.43986246 | 0.00122696 | up    | 769     | 842     | 1029    | 620   | 737   | 476   |
| Dbi           | 0.53083746 | 0.00125356 | up    | 1778    | 2588    | 2876    | 1467  | 1537  | 1610  |
| Glb1l         | 0.60406251 | 0.00127143 | up    | 278     | 237     | 300     | 175   | 189   | 143   |

Please follow the links to see the data of Supplementary Tables 3–9.

**Supplementary Table 3. All down-regulated DEGs.**

**Supplementary Table 4. All GO terms of biological process associated with up-regulated DEGs.**

**Supplementary Table 5. All GO terms of biological process associated with down-regulated DEGs.**

**Supplementary Table 6. All GO terms of cellular component associated with up-regulated DEGs.**

**Supplementary Table 7. All GO terms of cellular component associated with down-regulated DEGs.**

**Supplementary Table 8. All GO terms of molecular function associated with up-regulated DEGs.**

**Supplementary Table 9. All GO terms of molecular function associated with down-regulated DEGs.**

**Supplementary Table 10. All involved GO terms of biological process in GO-tree analysis.**

| GOID       | GOTerm                                                               | Style | 2GOID      | 2GOTerm                                                     | 2Style | Relation             |
|------------|----------------------------------------------------------------------|-------|------------|-------------------------------------------------------------|--------|----------------------|
| GO:0000122 | negative regulation of transcription from RNA polymerase II promoter | down  | GO:0006357 | regulation of transcription from RNA polymerase II promoter | down   | is_a                 |
| GO:0000122 | negative regulation of transcription from RNA polymerase II promoter | down  | GO:0006366 | transcription from RNA polymerase II promoter               | down   | negatively_regulates |
| GO:0000422 | mitochondrion degradation                                            | down  | GO:0006914 | autophagy                                                   | down   | is_a                 |
| GO:0006171 | cAMP biosynthetic process                                            | down  | GO:0009190 | cyclic nucleotide biosynthetic process                      | down   | is_a                 |
| GO:0006355 | regulation of transcription, DNA-templated                           | down  | GO:0006351 | transcription, DNA-templated                                | down   | regulates            |
| GO:0006357 | regulation of transcription from RNA polymerase II promoter          | down  | GO:0006355 | regulation of transcription, DNA-templated                  | down   | is_a                 |
| GO:0006357 | regulation of transcription from RNA polymerase II promoter          | down  | GO:0006366 | transcription from RNA polymerase II promoter               | down   | regulates            |
| GO:0006366 | transcription from RNA polymerase II promoter                        | down  | GO:0006351 | transcription, DNA-templated                                | down   | is_a                 |
| GO:0006468 | protein phosphorylation                                              | down  | GO:0016310 | phosphorylation                                             | down   | is_a                 |
| GO:0006811 | ion transport                                                        | down  | GO:0006810 | transport                                                   | down   | is_a                 |
| GO:0006836 | neurotransmitter transport                                           | down  | GO:0006810 | transport                                                   | down   | is_a                 |
| GO:0007269 | neurotransmitter secretion                                           | down  | GO:0006836 | neurotransmitter transport                                  | down   | is_a                 |
| GO:0007416 | synapse assembly                                                     | down  | GO:0007399 | nervous system development                                  | down   | part_of              |
| GO:0010107 | potassium ion import                                                 | down  | GO:0006813 | potassium ion transport                                     | down   | is_a                 |
| GO:0010506 | regulation of autophagy                                              | down  | GO:0006914 | autophagy                                                   | down   | regulates            |
| GO:0014047 | glutamate secretion                                                  | down  | GO:0007269 | neurotransmitter secretion                                  | down   | is_a                 |
| GO:0016358 | dendrite development                                                 | down  | GO:0031175 | neuron projection development                               | down   | part_of              |

|            |                                                         |      |            |                                            |      |                      |
|------------|---------------------------------------------------------|------|------------|--------------------------------------------|------|----------------------|
| GO:0018105 | peptidyl-serine phosphorylation                         | down | GO:0006468 | protein phosphorylation                    | down | is_a                 |
| GO:0018107 | peptidyl-threonine phosphorylation                      | down | GO:0006468 | protein phosphorylation                    | down | is_a                 |
| GO:0033563 | dorsal/ventral axon guidance                            | up   | GO:0007411 | axon guidance                              | down | is_a                 |
| GO:0035212 | cell competition in a multicellular organism            | up   | GO:0007275 | multicellular organismal development       | down | part_of              |
| GO:0042977 | activation of JAK2 kinase activity                      | up   | GO:0042976 | activation of Janus kinase activity        | up   | is_a                 |
| GO:0045893 | positive regulation of transcription, DNA-templated     | down | GO:0006351 | transcription, DNA-templated               | down | positively_regulates |
| GO:0045893 | positive regulation of transcription, DNA-templated     | down | GO:0006355 | regulation of transcription, DNA-templated | down | is_a                 |
| GO:0046929 | negative regulation of neurotransmitter secretion       | up   | GO:0007269 | neurotransmitter secretion                 | down | negatively_regulates |
| GO:0048662 | negative regulation of smooth muscle cell proliferation | down | GO:0008285 | negative regulation of cell proliferation  | down | is_a                 |
| GO:0050680 | negative regulation of epithelial cell proliferation    | down | GO:0008285 | negative regulation of cell proliferation  | down | is_a                 |
| GO:0060074 | synapse maturation                                      | down | GO:0007399 | nervous system development                 | down | part_of              |

**Supplementary Table 11. All KEGG pathways associated with up-regulated DEGs.**

| PathwayID  | PathwayTerm                                     | DifGene | AllDifGene | GeneInPathway | AllGene | P-Value  | FDR      | Enrichment | (-log10P) |
|------------|-------------------------------------------------|---------|------------|---------------|---------|----------|----------|------------|-----------|
| PATH:04978 | Mineral absorption                              | 2       | 15         | 46            | 7456    | 0.003715 | 0.126321 | 21.61159   | 2.430003  |
| PATH:03320 | PPAR signaling pathway                          | 2       | 15         | 81            | 7456    | 0.011168 | 0.189854 | 12.27325   | 1.95203   |
| PATH:00670 | One carbon pool by folate                       | 1       | 15         | 19            | 7456    | 0.037585 | 0.333358 | 26.1614    | 1.424991  |
| PATH:00450 | Selenoamino acid metabolism                     | 1       | 15         | 32            | 7456    | 0.062536 | 0.333358 | 15.53333   | 1.203869  |
| PATH:00250 | Alanine, aspartate and glutamate metabolism     | 1       | 15         | 37            | 7456    | 0.071971 | 0.333358 | 13.43423   | 1.142842  |
| PATH:00270 | Cysteine and methionine metabolism              | 1       | 15         | 40            | 7456    | 0.077589 | 0.333358 | 12.42667   | 1.110198  |
| PATH:03460 | Fanconi anemia pathway                          | 1       | 15         | 51            | 7456    | 0.09792  | 0.333358 | 9.746405   | 1.009131  |
| PATH:05210 | Colorectal cancer                               | 1       | 15         | 64            | 7456    | 0.121407 | 0.333358 | 7.766667   | 0.915757  |
| PATH:04730 | Long-term depression                            | 1       | 15         | 73            | 7456    | 0.137331 | 0.333358 | 6.809132   | 0.86223   |
| PATH:05412 | Arrhythmogenic right ventricular cardiomyopathy | 1       | 15         | 74            | 7456    | 0.139084 | 0.333358 | 6.717117   | 0.856723  |

|            |                                         |   |    |      |      |          |          |          |          |  |
|------------|-----------------------------------------|---|----|------|------|----------|----------|----------|----------|--|
|            | (ARVC)                                  |   |    |      |      |          |          |          |          |  |
| PATH:04970 | Salivary secretion                      | 1 | 15 | 77   | 7456 | 0.144322 | 0.333358 | 6.455411 | 0.840667 |  |
| PATH:01230 | Biosynthesis of amino acids             | 1 | 15 | 77   | 7456 | 0.144322 | 0.333358 | 6.455411 | 0.840667 |  |
| PATH:04151 | PI3K-Akt signaling pathway              | 2 | 15 | 346  | 7456 | 0.15169  | 0.333358 | 2.873218 | 0.819042 |  |
| PATH:04146 | Peroxisome                              | 1 | 15 | 82   | 7456 | 0.152986 | 0.333358 | 6.061789 | 0.815347 |  |
| PATH:04540 | Gap junction                            | 1 | 15 | 87   | 7456 | 0.161569 | 0.333358 | 5.71341  | 0.791643 |  |
| PATH:04974 | Protein digestion and absorption        | 1 | 15 | 89   | 7456 | 0.164979 | 0.333358 | 5.585019 | 0.782572 |  |
| PATH:04512 | ECM-receptor interaction                | 1 | 15 | 90   | 7456 | 0.166679 | 0.333358 | 5.522963 | 0.778119 |  |
| PATH:04713 | Circadian entrainment                   | 1 | 15 | 97   | 7456 | 0.17849  | 0.337148 | 5.124399 | 0.748386 |  |
| PATH:01200 | Carbon metabolism                       | 1 | 15 | 109  | 7456 | 0.198375 | 0.350059 | 4.560245 | 0.702513 |  |
| PATH:04270 | Vascular smooth muscle contraction      | 1 | 15 | 128  | 7456 | 0.228943 | 0.350059 | 3.883333 | 0.640273 |  |
| PATH:04611 | Platelet activation                     | 1 | 15 | 130  | 7456 | 0.232097 | 0.350059 | 3.82359  | 0.634331 |  |
| PATH:04722 | Neurotrophin signaling pathway          | 1 | 15 | 133  | 7456 | 0.236805 | 0.350059 | 3.737343 | 0.62561  |  |
| PATH:04360 | Axon guidance                           | 1 | 15 | 133  | 7456 | 0.236805 | 0.350059 | 3.737343 | 0.62561  |  |
| PATH:05322 | Systemic lupus erythematosus            | 1 | 15 | 144  | 7456 | 0.253837 | 0.359603 | 3.451852 | 0.595445 |  |
| PATH:04630 | Jak-STAT signaling pathway              | 1 | 15 | 155  | 7456 | 0.270514 | 0.3679   | 3.206882 | 0.56781  |  |
| PATH:04022 | cGMP-PKG signaling pathway              | 1 | 15 | 170  | 7456 | 0.292696 | 0.377713 | 2.923922 | 0.533583 |  |
| PATH:05202 | Transcriptional misregulation in cancer | 1 | 15 | 175  | 7456 | 0.299949 | 0.377713 | 2.840381 | 0.522953 |  |
| PATH:05034 | Alcoholism                              | 1 | 15 | 195  | 7456 | 0.328272 | 0.398616 | 2.54906  | 0.483766 |  |
| PATH:04510 | Focal adhesion                          | 1 | 15 | 207  | 7456 | 0.344748 | 0.404188 | 2.401288 | 0.462498 |  |
| PATH:04060 | Cytokine-cytokine receptor interaction  | 1 | 15 | 260  | 7456 | 0.413109 | 0.466947 | 1.911795 | 0.383935 |  |
| PATH:01100 | Metabolic pathways                      | 3 | 15 | 1188 | 7456 | 0.436412 | 0.466947 | 1.255219 | 0.360103 |  |
| PATH:04080 | Neuroactive ligand-receptor interaction | 1 | 15 | 282  | 7456 | 0.43948  | 0.466947 | 1.762648 | 0.357061 |  |
| PATH:05200 | Pathways in cancer                      | 1 | 15 | 325  | 7456 | 0.48786  | 0.502643 | 1.529436 | 0.311705 |  |
| PATH:04740 | Olfactory transduction                  | 1 | 15 | 1067 | 7456 | 0.901626 | 0.901626 | 0.465854 | 0.044974 |  |

Please follow the link to see the data of Supplementary Table 12.

**Supplementary Table 12. All KEGG pathways associated with down-regulated DEGs.**

**Supplementary Table 13. All involved KEGG pathways in pathway network analysis.**

| PathID     | PathTerm                                    | Style | 2PathID    | 2PathTerm                               | 2Style |
|------------|---------------------------------------------|-------|------------|-----------------------------------------|--------|
| PATH:04015 | Rap1 signaling pathway                      | down  | PATH:04020 | Calcium signaling pathway               | down   |
| PATH:04114 | Oocyte meiosis                              | down  | PATH:04914 | Progesterone-mediated oocyte maturation | down   |
| PATH:04141 | Protein processing in endoplasmic reticulum | down  | PATH:05020 | Prion diseases                          | down   |
| PATH:04261 | Adrenergic signaling in cardiomyocytes      | down  | PATH:04020 | Calcium signaling pathway               | down   |
| PATH:04540 | Gap junction                                | down  | PATH:04020 | Calcium signaling pathway               | down   |
| PATH:04710 | Circadian rhythm                            | down  | PATH:04713 | Circadian entrainment                   | down   |
| PATH:04713 | Circadian entrainment                       | down  | PATH:04710 | Circadian rhythm                        | down   |
| PATH:04721 | Synaptic vesicle cycle                      | down  | PATH:04724 | Glutamatergic synapse                   | down   |
| PATH:04721 | Synaptic vesicle cycle                      | down  | PATH:04725 | Cholinergic synapse                     | down   |
| PATH:04721 | Synaptic vesicle cycle                      | down  | PATH:04727 | GABAergic synapse                       | down   |
| PATH:04723 | Retrograde endocannabinoid signaling        | down  | PATH:04721 | Synaptic vesicle cycle                  | down   |
| PATH:04723 | Retrograde endocannabinoid signaling        | down  | PATH:04020 | Calcium signaling pathway               | down   |
| PATH:04723 | Retrograde endocannabinoid signaling        | down  | PATH:04724 | Glutamatergic synapse                   | down   |
| PATH:04723 | Retrograde endocannabinoid signaling        | down  | PATH:04727 | GABAergic synapse                       | down   |
| PATH:04724 | Glutamatergic synapse                       | down  | PATH:04721 | Synaptic vesicle cycle                  | down   |
| PATH:04724 | Glutamatergic synapse                       | down  | PATH:04020 | Calcium signaling pathway               | down   |
| PATH:04725 | Cholinergic synapse                         | down  | PATH:04721 | Synaptic vesicle cycle                  | down   |
| PATH:04725 | Cholinergic synapse                         | down  | PATH:04020 | Calcium signaling pathway               | down   |
| PATH:04727 | GABAergic synapse                           | down  | PATH:04721 | Synaptic vesicle cycle                  | down   |
| PATH:04742 | Taste transduction                          | down  | PATH:04020 | Calcium signaling pathway               | down   |
| PATH:04911 | Insulin secretion                           | down  | PATH:05211 | Renal cell carcinoma                    | down   |
| PATH:04911 | Insulin secretion                           | down  | PATH:04020 | Calcium signaling pathway               | down   |
| PATH:04912 | GnRH signaling pathway                      | down  | PATH:04020 | Calcium signaling pathway               | down   |
| PATH:04913 | Ovarian steroidogenesis                     | down  | PATH:04912 | GnRH signaling pathway                  | down   |
| PATH:04915 | Estrogen signaling pathway                  | down  | PATH:04020 | Calcium signaling pathway               | down   |
| PATH:04915 | Estrogen signaling pathway                  | down  | PATH:04913 | Ovarian steroidogenesis                 | down   |
| PATH:04915 | Estrogen signaling pathway                  | down  | PATH:04727 | GABAergic synapse                       | down   |
| PATH:04918 | Thyroid hormone synthesis                   | down  | PATH:04020 | Calcium signaling pathway               | down   |
| PATH:04970 | Salivary secretion                          | down  | PATH:04020 | Calcium signaling pathway               | down   |
| PATH:04971 | Gastric acid secretion                      | down  | PATH:04020 | Calcium signaling pathway               | down   |
| PATH:05032 | Morphine addiction                          | down  | PATH:04727 | GABAergic synapse                       | down   |
| PATH:05166 | HTLV-I infection                            | down  | PATH:04115 | p53 signaling pathway                   | down   |
| PATH:05213 | Endometrial cancer                          | down  | PATH:04115 | p53 signaling pathway                   | down   |
| PATH:05221 | Acute myeloid leukemia                      | down  | PATH:04150 | mTOR signaling pathway                  | down   |
