# Supplementary material for: Cognitive impairment and transcriptomic profile in hippocampus of young mice after multiple neonatal exposures to sevoflurane
Source: Aging (Albany NY). 2019 Oct 3;11(19):8386–417. doi: 10.18632/aging.102326 (PMC6814607; doi:10.18632/aging.102326)
Supplement: Supplementary Table 3 [file aging-11-102326-s003.xlsx]

## Sheet: Sheet1
Supplementary Table 3. All down-regulated DEGs.
AccID	log2FC	Pvalue	Style	AX3HiP1	AX3HiP6	AX3HiP7	C1HiP	C2HiP	C3HiP
Sdf2l1	-1.1809	7.82201e-14	down	204	196	313	476	518	489
E130012A19Rik	-1.4612	5.88872e-12	down	777	648	1713	2974	2601	2148
Gatsl2	-0.651622	6.21817e-12	down	1824	1881	2660	3449	3407	2480
Rims4	-0.999193	5.34866e-11	down	398	373	677	1033	956	681
Doc2a	-0.748349	6.73485e-10	down	474	431	653	910	850	679
Klf4	-1.35382	8.58878e-10	down	115	153	224	382	518	267
Efhd2	-0.748116	1.73745e-08	down	3577	3026	5312	7240	6444	4883
Ccdc184	-0.774195	1.86162e-08	down	410	371	627	854	782	596
Stx1a	-0.656589	2.18487e-08	down	3236	2725	4151	5578	5230	4116
Sox18	-1.23674	4.24309e-08	down	126	93	175	242	335	276
Nr2f1	-0.490173	4.72885e-08	down	1156	1170	1669	1891	1807	1516
Cit	-0.94487	1.49302e-07	down	1373	880	1524	2602	2357	1885
9430020K01Rik	-0.446476	2.1586e-07	down	1638	1694	2453	2682	2588	2054
Kcnab3	-0.693993	2.83118e-07	down	658	652	903	1181	1029	1100
Lasp1	-0.635166	3.35287e-07	down	2338	2252	4009	4528	4461	3287
Cacna1i	-0.532536	3.60193e-07	down	2112	2104	3369	3766	3346	2987
Fosl2	-0.591535	3.75236e-07	down	1526	1380	2030	2681	2449	1842
Pdia6	-0.556481	3.97595e-07	down	1939	1995	2532	2961	3062	2832
Xbp1	-0.594609	4.13856e-07	down	1270	1130	1512	1949	1985	1616
Pgr	-0.579401	5.15116e-07	down	600	576	886	1079	1009	777
Mxi1	-0.494459	5.2218e-07	down	1247	1242	1868	2141	1930	1621
Hspa5	-0.66802	5.36272e-07	down	4257	4480	5583	6573	7308	7214
Pdzrn3	-0.788976	6.18154e-07	down	339	298	390	570	547	541
Sowahb	-1.53652	7.64504e-07	down	159	81	104	331	288	336
Parm1	-0.508953	7.6879e-07	down	728	803	1048	1239	1261	931
Manf	-0.581454	1.28373e-06	down	804	864	1174	1283	1353	1289
Kcnh3	-0.665042	1.61284e-06	down	2303	2272	4150	4998	4172	3484
Adrb1	-0.720533	2.10818e-06	down	440	369	707	801	843	650
Kcnf1	-0.51012	2.37157e-06	down	1941	1745	2550	2927	3099	2286
Sncb	-0.529377	2.51883e-06	down	7729	7359	11101	13497	12922	8940
Kcnc4	-0.770137	3.01959e-06	down	2016	1543	2147	3376	3614	2291
Prkar1b	-0.445488	3.60175e-06	down	9234	10060	15604	15815	16016	12010
Fbxo2	-0.539468	3.6221e-06	down	2192	2153	3640	4077	3738	2885
1110032F04Rik	-0.860899	3.9707e-06	down	260	259	455	706	530	399
Man1c1	-0.567123	3.97776e-06	down	687	782	1257	1301	1367	1038
Lrrtm3	-0.730634	4.36261e-06	down	451	408	497	734	847	557
Glul	-0.414213	5.86943e-06	down	18485	21008	31767	31202	31051	25095
Nfix	-0.381177	6.28209e-06	down	6177	6024	9075	9299	9191	7242
Tmem151b	-0.670812	6.45014e-06	down	2540	2625	4915	5798	4971	3874
Adap1	-0.576768	6.63812e-06	down	4205	3865	6899	7961	7158	5460
Slc38a2	-0.430431	6.9951e-06	down	2068	2272	3083	3104	3245	2901
Arhgap32	-0.566206	7.01695e-06	down	3713	3152	4257	5824	5449	4288
Rhobtb2	-0.526973	7.21949e-06	down	1798	1612	2384	3013	2754	2061
R3hdm2	-0.52188	7.34731e-06	down	3689	3430	5664	6540	6028	4462
Kcnb1	-0.537144	7.7808e-06	down	4361	3734	5647	7061	6746	4911
Hivep3	-0.628346	8.22636e-06	down	1353	1286	2175	2741	2484	1685
Hivep1	-0.685442	1.02254e-05	down	1135	889	1415	2099	1789	1317
Rims3	-1.0414	1.07924e-05	down	368	213	437	838	561	555
Prph	-1.8884	1.15543e-05	down	77	53	24	213	171	186
Ppp1r10	-0.544966	1.313e-05	down	1204	1086	1915	2058	2064	1538
Kcnj11	-0.598787	1.35849e-05	down	857	712	1234	1520	1346	1073
Cobl	-1.00416	1.40009e-05	down	783	464	612	1279	1368	959
Palm	-0.621621	1.4122e-05	down	3875	4045	7517	7996	8056	5639
Il17d	-1.08473	1.41404e-05	down	488	336	1010	1427	1220	856
Fam57b	-0.538842	1.57052e-05	down	1958	1712	2801	3386	3086	2288
Lmtk2	-0.526442	1.70775e-05	down	2904	2570	4388	5044	4622	3502
Shf	-0.639712	1.86076e-05	down	814	735	1322	1571	1552	1019
Cited4	-1.67015	1.86552e-05	down	52	16	73	147	134	126
Znrf1	-0.461771	1.89274e-05	down	2736	2644	4359	4557	4506	3339
Syvn1	-0.489053	1.93951e-05	down	907	988	1530	1454	1657	1307
Plxnd1	-0.62727	2.01946e-05	down	1194	913	1391	1759	1926	1399
Cckbr	-1.00302	2.17556e-05	down	452	268	368	748	661	668
Zfp444	-0.591729	2.22552e-05	down	531	633	1048	1123	1077	847
Kcnj4	-0.621478	2.39217e-05	down	1622	1480	2597	3243	2923	1971
Stxbp1	-0.411899	2.70855e-05	down	14086	13812	21779	22932	21907	16457
Mafb	-0.611371	2.91091e-05	down	300	363	587	619	613	512
Nes	-0.708133	3.02607e-05	down	248	249	461	522	452	447
Spry2	-0.694249	3.51923e-05	down	778	575	849	1335	1138	900
Sgpp2	-0.887648	3.67246e-05	down	169	114	218	334	263	261
Foxq1	-0.941301	3.76507e-05	down	98	100	217	263	273	187
Gp1bb	-0.93023	3.84226e-05	down	151	165	358	437	444	282
Srrm3	-0.604951	3.93411e-05	down	1364	1188	2284	2621	2346	1792
Vwa1	-0.701651	4.01021e-05	down	635	518	1086	1306	1109	914
Cacng2	-0.444077	4.36727e-05	down	843	771	1166	1258	1219	1036
Pcdh7	-0.378625	4.40571e-05	down	1576	1814	2297	2386	2408	2080
Btbd11	-0.572909	4.4785e-05	down	503	495	810	890	975	630
Gfod1	-0.508062	4.5244e-05	down	2171	2756	4223	4424	4125	3361
Csnk1e	-0.428915	4.79062e-05	down	2172	2008	3151	3418	3284	2480
Abhd8	-0.624537	5.17652e-05	down	3524	3683	7253	7574	7231	5418
Tbr1	-0.856655	5.35734e-05	down	1386	865	1171	2310	2099	1564
Tbx3	-1.03473	5.35851e-05	down	66	58	103	131	189	111
Cry1	-0.613539	5.55159e-05	down	223	260	414	430	436	388
Olfm2	-0.73415	5.55499e-05	down	1422	1056	1601	2451	2549	1466
Rap1gap2	-0.50423	5.75245e-05	down	4861	4336	6000	7787	7435	5153
Gm11549	-1.37127	5.82592e-05	down	170	87	158	309	238	438
Foxg1	-0.612647	6.13157e-05	down	3576	3521	6907	7367	7161	5012
Scrt1	-0.676842	6.36582e-05	down	2370	2355	5010	5358	4819	3864
Atxn7l3	-0.447356	6.48052e-05	down	4205	4402	7320	7404	7197	5380
Paqr7	-0.493817	6.77761e-05	down	915	1056	1726	1731	1659	1369
Dio2	-0.436048	6.91452e-05	down	838	882	1295	1382	1223	1158
Cep170b	-0.601357	7.18295e-05	down	4287	4375	8248	8805	8832	5846
Htra1	-0.418075	7.31976e-05	down	2007	2460	3586	3486	3515	2885
Med13l	-0.408048	7.5559e-05	down	2172	2038	3165	3419	3209	2474
Rapgef1	-0.437792	7.57005e-05	down	2940	2959	4975	5073	4718	3755
Cldn5	-0.570029	7.64138e-05	down	644	572	1034	1013	1061	975
Hyou1	-0.389655	7.94212e-05	down	1920	1987	2851	2679	3049	2467
C1ql2	-0.421771	7.96516e-05	down	1156	1222	1840	1969	1697	1546
Eng	-0.665657	8.58769e-05	down	458	464	947	930	967	780
Adcy1	-0.433283	8.82284e-05	down	18165	17299	23559	29187	26415	19479
Zfp36l2	-0.773928	8.89907e-05	down	423	344	830	859	860	736
Flywch1	-0.449138	9.20861e-05	down	3042	3199	5426	5417	5117	4066
Pou6f1	-0.599158	9.24501e-05	down	2775	2350	4595	5388	4648	3511
Ina	-0.447148	9.26047e-05	down	2471	2626	4145	4362	4304	2999
Nos3	-0.696173	9.93042e-05	down	267	326	596	601	661	484
Brsk1	-0.48542	0.000100945	down	3722	3996	6870	7149	6480	5077
Mtcl1	-0.729381	0.000101872	down	978	838	1962	2162	1992	1509
Igfbp6	-0.652106	0.000103064	down	209	178	320	378	336	308
Limk1	-0.661211	0.000110019	down	1010	847	1765	1972	1980	1305
Tmem132a	-0.529399	0.000120085	down	5245	5514	9879	9868	10398	7025
1110008P14Rik	-0.642684	0.000133126	down	1455	1071	1705	2389	2356	1509
Ank1	-0.614107	0.000135179	down	1209	900	1744	2082	1963	1424
Adcy8	-0.689551	0.000135285	down	580	478	577	930	983	617
Rtn2	-0.553826	0.000139612	down	1218	1210	2277	2435	2182	1693
Cdk16	-0.390648	0.000141306	down	5448	5538	8783	9191	8069	6670
Klf5	-1.19268	0.000144815	down	158	83	120	352	287	167
Mast2	-0.409045	0.000149396	down	2141	2080	3225	3461	3338	2402
Tnk2	-0.568015	0.000150492	down	3681	3426	6950	7059	6399	5436
Zc3h7b	-0.471481	0.000153917	down	3974	4416	7523	7573	7098	5510
Pou3f3	-0.765344	0.000155185	down	1823	1842	4370	4730	4344	3164
Ppard	-0.632438	0.000156706	down	435	472	895	994	851	694
Pik3cd	-0.460226	0.000164688	down	720	663	1020	1147	1133	806
Fezf2	-0.606682	0.000164892	down	1200	1011	1753	2154	2184	1306
Grm2	-0.81127	0.000167672	down	1548	1081	1821	3083	2875	1492
Banp	-0.450591	0.000168389	down	615	581	781	866	948	718
Ubqln4	-0.37575	0.000174422	down	2311	2348	3550	3771	3478	2648
Bax	-0.376606	0.000176084	down	926	987	1464	1518	1418	1127
Ndel1	-0.336415	0.000180671	down	1292	1305	1909	1890	1901	1494
Ttbk1	-0.689761	0.000188187	down	2299	2442	5363	5495	5221	3918
Dusp26	-0.526583	0.000189408	down	991	861	1537	1732	1632	1159
Gcnt4	-1.30946	0.00019046	down	124	43	137	230	213	247
Dmtn	-0.392272	0.000202137	down	5431	5804	8969	9043	9122	6400
Adcy4	-0.728497	0.000206434	down	95	99	153	211	178	144
Cacng7	-0.576912	0.000216091	down	1445	1512	2902	3066	2827	2069
Kif5a	-0.406749	0.000225144	down	36572	42686	66093	62352	58997	54459
Git1	-0.571965	0.000226504	down	5610	6264	11917	12136	11482	8474
2900011O08Rik	-0.334945	0.000227038	down	3498	3405	5098	5118	5116	3854
Bcl6	-0.490812	0.000228757	down	783	811	1411	1451	1395	1032
Scn1b	-0.400349	0.000235391	down	8133	8342	13693	14017	12198	10385
Coro2a	-0.485749	0.000238358	down	697	615	941	1081	1115	759
Gdpd5	-0.48516	0.00023844	down	583	529	815	948	929	645
Snx21	-0.599736	0.000241396	down	446	418	837	886	788	670
Fgfr3	-0.487329	0.000241828	down	2178	2356	3858	4142	4046	2684
Apba1	-0.532485	0.000251057	down	4484	4159	6992	8312	7839	4930
Adrbk1	-0.402816	0.00026283	down	3735	4054	6516	6624	6064	4724
Clstn1	-0.458358	0.00026323	down	19653	20756	36784	36255	34212	26450
Azin2	-0.458711	0.000266955	down	692	679	1116	1221	1099	842
C1qtnf4	-0.677415	0.000268374	down	2412	2243	4867	5061	5512	3299
Rab11fip3	-0.444083	0.000271163	down	2706	2838	4795	4803	4753	3388
Camk2n2	-0.767424	0.000274762	down	1852	2075	4835	5158	4758	3406
Ubl7	-0.396573	0.000276904	down	934	937	1509	1511	1394	1193
Spred1	-0.319137	0.000277305	down	2246	2304	3486	3279	3367	2633
Gid4	-0.349751	0.000285812	down	1332	1319	2010	1983	1874	1633
Rnf217	-0.888179	0.000294255	down	197	237	522	616	624	357
Aldoc	-0.409325	0.000313962	down	10716	11402	18886	18031	18707	13357
Sst	-0.390054	0.000320934	down	3504	4316	5797	5663	6403	4499
Mex3b	-0.420194	0.000322538	down	501	486	770	757	781	634
Cbln2	-0.815824	0.000325823	down	279	187	265	453	354	404
Shank2	-0.529901	0.000327859	down	3803	3697	6953	7138	7233	4781
Kcnk12	-0.845306	0.000329961	down	278	291	717	820	733	515
Extl1	-0.497796	0.000345152	down	1565	1318	2185	2604	2407	1678
Calr	-0.396714	0.000354348	down	5604	6220	7469	7586	8819	7317
Stard10	-0.712069	0.000355527	down	456	425	958	1110	901	714
Pink1	-0.396471	0.000378775	down	6224	6501	10588	10557	9110	8435
Sobp	-0.623016	0.000386971	down	2710	2451	4967	5461	5567	3310
Dand5	-0.616753	0.000389921	down	157	138	190	252	246	199
Golga7b	-0.381066	0.000390732	down	1643	1719	2565	2717	2607	1858
Mta3	-0.332667	0.000391271	down	872	928	1337	1320	1282	1059
Arl4c	-0.437529	0.000403982	down	1199	1072	1496	1813	1736	1257
Cx3cl1	-0.406611	0.000405214	down	9710	10081	16382	16726	16212	11395
Klhdc3	-0.377651	0.000423959	down	4047	3902	6262	6478	6115	4535
Zbtb16	-0.473194	0.000430771	down	1128	1438	1511	1977	1969	1409
Bmper	-0.928948	0.000432701	down	207	104	191	327	295	279
Igsf9b	-0.786618	0.000441988	down	551	320	658	1008	883	591
Plekho1	-0.600037	0.000443202	down	392	314	643	710	635	528
Fxyd7	-0.6114	0.00046017	down	1023	861	1040	1722	1536	1031
Creld2	-0.515407	0.000463531	down	301	255	421	447	473	375
Lrrc75a	-0.677875	0.000468697	down	135	107	176	205	230	186
Igsf21	-0.680314	0.000469705	down	940	850	1647	1994	2034	1077
Fam171a2	-0.588993	0.000473415	down	1640	1822	3661	3415	3610	2638
Sgsm1	-0.362644	0.00047911	down	2022	2132	3237	3140	3337	2337
Ulk1	-0.4822	0.000480962	down	1854	1907	3581	3311	3328	2675
Elk1	-0.322084	0.000481618	down	1488	1534	2178	2228	2187	1645
Cyp46a1	-0.405476	0.00048284	down	3026	2915	4533	4799	4875	3263
Kifc2	-0.447125	0.000485725	down	12124	10861	18930	20401	19005	13549
Ranbp9	-0.366846	0.000485943	down	1190	1289	1844	1678	1878	1587
Atg9a	-0.456224	0.000488485	down	2691	2945	5148	5117	4719	3681
Pak6	-0.48417	0.000490358	down	1705	1840	3003	3294	3131	2052
Zmiz2	-0.575476	0.000500122	down	4982	4669	9756	10296	9253	6764
Bloc1s3	-0.537308	0.000511969	down	219	218	373	407	373	302
Kcnk3	-0.57898	0.000519199	down	272	231	453	469	469	371
Nat8l	-0.520109	0.000520595	down	5777	5536	10907	11271	10111	7679
Myo18a	-0.421075	0.000531278	down	3874	3717	6715	6424	6130	4973
Tshz3	-1.05353	0.000538689	down	446	226	269	808	666	457
Kcnc1	-0.416166	0.000546699	down	4435	4408	7595	7759	7005	5416
Tmem240	-0.448509	0.000554398	down	648	587	990	1077	968	766
9130024F11Rik	-1.12126	0.000561369	down	251	119	169	517	390	247
Farp1	-0.455277	0.000567064	down	1388	1293	2252	2324	2335	1597
Rell2	-0.652685	0.000572503	down	797	711	1603	1753	1565	1122
Dab2ip	-0.426621	0.000575414	down	2377	2649	4477	4316	4196	3181
Flrt1	-0.563835	0.000579506	down	474	438	720	846	888	520
Plod3	-0.431271	0.000582069	down	709	681	1163	1067	1178	918
Fbxl19	-0.474753	0.000599834	down	1806	1982	3493	3536	3275	2443
Ctnnd2	-0.48431	0.000602633	down	3383	3328	5967	6117	6188	4038
Dact3	-0.816114	0.000622824	down	2894	3534	8913	9104	8438	6272
Syt2	-0.796257	0.000625419	down	388	215	509	715	605	472
Dennd4b	-0.405054	0.000627782	down	1131	1168	1854	1986	1754	1349
Kcnj2	-1.12878	0.000634854	down	245	110	136	401	361	293
Fkbp4	-0.356261	0.000640861	down	1883	2157	3312	2987	3139	2514
Pdia4	-0.556033	0.000644313	down	554	622	854	819	928	982
Sparcl1	-0.281002	0.000652693	down	24599	24286	32945	32265	33009	27490
Npas4	-0.982316	0.000655468	down	359	161	270	553	572	385
Adgra1	-0.438606	0.00066803	down	1917	1840	2535	2853	3197	1988
Grm4	-0.916327	0.000690166	down	602	302	843	1275	1124	667
Pknox2	-0.495913	0.000702771	down	690	600	749	1033	928	763
Clec2l	-0.509001	0.000737739	down	1016	834	1608	1752	1541	1236
Ccdc97	-0.501921	0.000741009	down	765	871	1552	1553	1452	1110
Zmat3	-0.294671	0.000746278	down	1623	1821	2584	2485	2384	1974
Camkk2	-0.334563	0.000763396	down	3884	3742	5795	5982	5286	4423
Cerk	-0.376533	0.000764324	down	1455	1337	2203	2247	2063	1688
Wipf2	-0.333508	0.000768974	down	1768	1790	2693	2704	2668	1952
Nlk	-0.477221	0.000778338	down	1545	1213	1743	2213	2021	1672
Sh3bp5l	-0.362662	0.000788891	down	1119	1237	1920	1846	1702	1500
Fscn1	-0.51391	0.000788902	down	3364	3875	7130	6944	6832	4878
Cplx1	-0.419892	0.000795449	down	10535	11789	19953	18429	17012	15890
Dlgap4	-0.528768	0.000799695	down	5178	5737	10997	10675	10592	7440
Rtn4r	-0.374856	0.0008043	down	1052	1077	1775	1668	1595	1380
Syngr1	-0.337513	0.000804384	down	11968	12515	19895	19503	18218	14044
Satb2	-1.04096	0.000808672	down	529	234	329	904	784	526
Sema7a	-0.359171	0.000817715	down	2994	3110	4977	4966	4303	3799
Sbk1	-0.560806	0.0008214	down	1809	2377	4127	4193	4118	2840
Nrsn1	-0.341851	0.000822195	down	4059	4178	6168	5694	5698	5400
Ppp1r16a	-0.407834	0.000823364	down	1184	1233	2060	2075	1933	1461
Hlf	-0.64208	0.000828898	down	3902	2517	3532	5462	5415	4005
Kcna3	-0.5788	0.000830348	down	164	189	319	341	334	246
Kcnj9	-0.618725	0.000838632	down	3246	2363	3367	5206	4991	3019
Arhgef10l	-0.626105	0.000858054	down	968	792	1792	2024	1656	1309
Myrip	-0.342637	0.000894858	down	1319	1596	1949	2044	1949	1743
1700037H04Rik	-0.447883	0.00090878	down	720	737	1109	1207	1267	794
Sel1l3	-0.427763	0.000919422	down	1260	1051	1462	1703	1697	1374
Chst8	-0.490939	0.000944317	down	424	459	790	747	835	575
Emx1	-0.619871	0.000951735	down	271	269	556	598	513	417
Osbpl10	-0.590892	0.000962644	down	513	430	770	914	950	545
Daam2	-0.320263	0.000972094	down	1734	1933	2941	2722	2652	2216
Arhgdig	-0.404311	0.000981408	down	1039	917	1536	1621	1480	1182
Podxl2	-0.441334	0.0009942	down	1370	1434	2531	2562	2249	1817
Tef	-0.307369	0.0010333	down	7640	7477	10056	10768	10584	7906
Rabl6	-0.272684	0.0010679	down	2773	2879	4217	4070	3816	3165
Zfp365	-0.403033	0.00107036	down	7274	6157	8940	10333	10234	7311
1700021K19Rik	-0.327817	0.00109377	down	1716	1690	2709	2604	2471	2011
Dlgap3	-0.728288	0.00110423	down	5664	6777	16282	16131	14998	11051
Trak1	-0.383911	0.00112081	down	3470	3790	6330	6015	5858	4398
Sema6c	-0.515018	0.00112442	down	720	614	1150	1286	1179	819
Clstn3	-0.413495	0.00112657	down	7643	7843	13935	13399	12985	9530
Igsf9	-0.834043	0.00112873	down	130	78	148	241	174	177
Fgd2	-0.616647	0.00115202	down	179	137	248	312	277	215
Pten	-0.281794	0.0011546	down	2451	2409	3340	3381	3273	2653
Egr1	-0.63057	0.00120293	down	3331	2230	3927	5853	4852	3206
Map6	-0.45283	0.00120981	down	2367	2136	3676	3957	3921	2531
Mtus2	-0.352462	0.00121881	down	807	948	1210	1244	1336	956
Map1lc3b	-0.267914	0.00123318	down	2454	2620	3660	3392	3611	2772
Baalc	-0.320258	0.0012442	down	2264	2294	3447	3225	3094	2886
Grid1	-0.381157	0.00125493	down	1134	1385	2089	2011	1996	1514
Srcin1	-0.456722	0.00127987	down	10475	9891	18405	18814	17811	12311
Ralbp1	-0.275239	0.00128431	down	1527	1598	2296	2196	2178	1719
Stk32c	-0.295465	0.00129133	down	1382	1466	2000	2061	1977	1516
