# Supplementary material for: Cognitive impairment and transcriptomic profile in hippocampus of young mice after multiple neonatal exposures to sevoflurane
Source: Aging (Albany NY). 2019 Oct 3;11(19):8386–417. doi: 10.18632/aging.102326 (PMC6814607; doi:10.18632/aging.102326)
Supplement: Supplementary Table 4 [file aging-11-102326-s001.xlsx]

## Sheet: UpGO_Result
Supplementary Table 4. All GO terms of biological process associated with up-regulated DEGs.
GOID	GOTerm	DifGene	AllDifGene	GeneInGO	AllGene	P-Value	FDR	Enrichment	(-log10P)
GO:1900748	positive regulation of vascular endothelial growth factor signaling pathway	2	48	3	21206	1.50292e-05	0.00405787	294.528	4.82307
GO:0006882	cellular zinc ion homeostasis	2	48	13	21206	0.000385148	0.0406079	67.9679	3.41437
GO:0006829	zinc ion transport	2	48	26	21206	0.00157494	0.0406079	33.984	2.80273
GO:0006730	one-carbon metabolic process	2	48	30	21206	0.00209588	0.0406079	29.4528	2.67863
GO:0035212	cell competition in a multicellular organism	1	48	1	21206	0.00226351	0.0406079	441.792	2.64522
GO:0090230	regulation of centromere complex assembly	1	48	1	21206	0.00226351	0.0406079	441.792	2.64522
GO:0030575	nuclear body organization	1	48	1	21206	0.00226351	0.0406079	441.792	2.64522
GO:1990245	histone H2A-T120 phosphorylation	1	48	1	21206	0.00226351	0.0406079	441.792	2.64522
GO:0036018	cellular response to erythropoietin	1	48	1	21206	0.00226351	0.0406079	441.792	2.64522
GO:0071584	negative regulation of zinc ion transmembrane import	1	48	1	21206	0.00226351	0.0406079	441.792	2.64522
GO:0060027	convergent extension involved in gastrulation	1	48	1	21206	0.00226351	0.0406079	441.792	2.64522
GO:0071909	determination of stomach left/right asymmetry	1	48	1	21206	0.00226351	0.0406079	441.792	2.64522
GO:0071908	determination of intestine left/right asymmetry	1	48	1	21206	0.00226351	0.0406079	441.792	2.64522
GO:0071585	detoxification of cadmium ion	1	48	1	21206	0.00226351	0.0406079	441.792	2.64522
GO:0070555	response to interleukin-1	2	48	33	21206	0.00253299	0.0406079	26.7753	2.59637
GO:0006641	triglyceride metabolic process	2	48	34	21206	0.00268743	0.0406079	25.9877	2.57066
GO:0098655	cation transmembrane transport	3	48	131	21206	0.00325296	0.0406079	10.1174	2.48772
GO:1902340	negative regulation of chromosome condensation	1	48	2	21206	0.004522	0.0406079	220.896	2.34467
GO:0010573	vascular endothelial growth factor production	1	48	2	21206	0.004522	0.0406079	220.896	2.34467
GO:2000095	regulation of Wnt signaling pathway, planar cell polarity pathway	1	48	2	21206	0.004522	0.0406079	220.896	2.34467
GO:0010920	negative regulation of inositol phosphate biosynthetic process	1	48	2	21206	0.004522	0.0406079	220.896	2.34467
GO:0042977	activation of JAK2 kinase activity	1	48	2	21206	0.004522	0.0406079	220.896	2.34467
GO:0046898	response to cycloheximide	1	48	2	21206	0.004522	0.0406079	220.896	2.34467
GO:0044236	multicellular organismal metabolic process	1	48	2	21206	0.004522	0.0406079	220.896	2.34467
GO:0043954	cellular component maintenance	1	48	2	21206	0.004522	0.0406079	220.896	2.34467
GO:0035583	sequestering of TGFbeta in extracellular matrix	1	48	2	21206	0.004522	0.0406079	220.896	2.34467
GO:0033274	response to vitamin B2	1	48	2	21206	0.004522	0.0406079	220.896	2.34467
GO:0007320	insemination	1	48	2	21206	0.004522	0.0406079	220.896	2.34467
GO:0021965	spinal cord ventral commissure morphogenesis	1	48	2	21206	0.004522	0.0406079	220.896	2.34467
GO:0006600	creatine metabolic process	1	48	3	21206	0.00677549	0.0406079	147.264	2.16906
GO:0003223	ventricular compact myocardium morphogenesis	1	48	3	21206	0.00677549	0.0406079	147.264	2.16906
GO:0019478	D-amino acid catabolic process	1	48	3	21206	0.00677549	0.0406079	147.264	2.16906
GO:1901492	positive regulation of lymphangiogenesis	1	48	3	21206	0.00677549	0.0406079	147.264	2.16906
GO:0006030	chitin metabolic process	1	48	3	21206	0.00677549	0.0406079	147.264	2.16906
GO:0006533	aspartate catabolic process	1	48	3	21206	0.00677549	0.0406079	147.264	2.16906
GO:0036151	phosphatidylcholine acyl-chain remodeling	1	48	3	21206	0.00677549	0.0406079	147.264	2.16906
GO:0002934	desmosome organization	1	48	3	21206	0.00677549	0.0406079	147.264	2.16906
GO:1990009	retinal cell apoptotic process	1	48	3	21206	0.00677549	0.0406079	147.264	2.16906
GO:1902608	positive regulation of large conductance calcium-activated potassium channel activity	1	48	3	21206	0.00677549	0.0406079	147.264	2.16906
GO:0046929	negative regulation of neurotransmitter secretion	1	48	3	21206	0.00677549	0.0406079	147.264	2.16906
GO:0006556	S-adenosylmethionine biosynthetic process	1	48	3	21206	0.00677549	0.0406079	147.264	2.16906
GO:0006555	methionine metabolic process	1	48	3	21206	0.00677549	0.0406079	147.264	2.16906
GO:0042976	activation of Janus kinase activity	1	48	3	21206	0.00677549	0.0406079	147.264	2.16906
GO:0035582	sequestering of BMP in extracellular matrix	1	48	3	21206	0.00677549	0.0406079	147.264	2.16906
GO:2000224	regulation of testosterone biosynthetic process	1	48	3	21206	0.00677549	0.0406079	147.264	2.16906
GO:0043588	skin development	2	48	56	21206	0.00714748	0.0406079	15.7783	2.14585
GO:0048496	maintenance of organ identity	1	48	4	21206	0.00902398	0.0406079	110.448	2.0446
GO:0072337	modified amino acid transport	1	48	4	21206	0.00902398	0.0406079	110.448	2.0446
GO:0042276	error-prone translesion synthesis	1	48	4	21206	0.00902398	0.0406079	110.448	2.0446
GO:0033563	dorsal/ventral axon guidance	1	48	4	21206	0.00902398	0.0406079	110.448	2.0446
GO:0031999	negative regulation of fatty acid beta-oxidation	1	48	4	21206	0.00902398	0.0406079	110.448	2.0446
GO:0071896	protein localization to adherens junction	1	48	4	21206	0.00902398	0.0406079	110.448	2.0446
GO:0010273	detoxification of copper ion	1	48	4	21206	0.00902398	0.0406079	110.448	2.0446
GO:1902603	carnitine transmembrane transport	1	48	4	21206	0.00902398	0.0406079	110.448	2.0446
GO:0038007	netrin-activated signaling pathway	1	48	4	21206	0.00902398	0.0406079	110.448	2.0446
GO:0090281	negative regulation of calcium ion import	1	48	4	21206	0.00902398	0.0406079	110.448	2.0446
GO:0006549	isoleucine metabolic process	1	48	4	21206	0.00902398	0.0406079	110.448	2.0446
GO:0070574	cadmium ion transmembrane transport	1	48	4	21206	0.00902398	0.0406079	110.448	2.0446
GO:0000255	allantoin metabolic process	1	48	4	21206	0.00902398	0.0406079	110.448	2.0446
GO:0046449	creatinine metabolic process	1	48	4	21206	0.00902398	0.0406079	110.448	2.0446
GO:0060271	cilium morphogenesis	2	48	64	21206	0.0092499	0.0409422	13.806	2.03386
GO:0009725	response to hormone	2	48	67	21206	0.0101011	0.0439885	13.1878	1.99563
GO:0033564	anterior/posterior axon guidance	1	48	5	21206	0.0112675	0.0447386	88.3583	1.94817
GO:0072189	ureter development	1	48	5	21206	0.0112675	0.0447386	88.3583	1.94817
GO:0003283	atrial septum development	1	48	5	21206	0.0112675	0.0447386	88.3583	1.94817
GO:0048845	venous blood vessel morphogenesis	1	48	5	21206	0.0112675	0.0447386	88.3583	1.94817
GO:0015879	carnitine transport	1	48	5	21206	0.0112675	0.0447386	88.3583	1.94817
GO:0035469	determination of pancreatic left/right asymmetry	1	48	5	21206	0.0112675	0.0447386	88.3583	1.94817
GO:0060385	axonogenesis involved in innervation	1	48	6	21206	0.013506	0.0467516	73.6319	1.86947
GO:0006531	aspartate metabolic process	1	48	6	21206	0.013506	0.0467516	73.6319	1.86947
GO:0015697	quaternary ammonium group transport	1	48	6	21206	0.013506	0.0467516	73.6319	1.86947
GO:0071910	determination of liver left/right asymmetry	1	48	6	21206	0.013506	0.0467516	73.6319	1.86947
GO:0014009	glial cell proliferation	1	48	6	21206	0.013506	0.0467516	73.6319	1.86947
GO:0032964	collagen biosynthetic process	1	48	6	21206	0.013506	0.0467516	73.6319	1.86947
GO:0006573	valine metabolic process	1	48	6	21206	0.013506	0.0467516	73.6319	1.86947
GO:0048305	immunoglobulin secretion	1	48	6	21206	0.013506	0.0467516	73.6319	1.86947
GO:0003406	retinal pigment epithelium development	1	48	6	21206	0.013506	0.0467516	73.6319	1.86947
GO:0010954	positive regulation of protein processing	1	48	6	21206	0.013506	0.0467516	73.6319	1.86947
GO:0061049	cell growth involved in cardiac muscle cell development	1	48	7	21206	0.0157396	0.0505916	63.1131	1.80301
GO:0016584	nucleosome positioning	1	48	7	21206	0.0157396	0.0505916	63.1131	1.80301
GO:0060396	growth hormone receptor signaling pathway	1	48	7	21206	0.0157396	0.0505916	63.1131	1.80301
GO:0060831	smoothened signaling pathway involved in dorsal/ventral neural tube patterning	1	48	7	21206	0.0157396	0.0505916	63.1131	1.80301
GO:0006101	citrate metabolic process	1	48	7	21206	0.0157396	0.0505916	63.1131	1.80301
GO:0019530	taurine metabolic process	1	48	7	21206	0.0157396	0.0505916	63.1131	1.80301
GO:0090331	negative regulation of platelet aggregation	1	48	8	21206	0.0179682	0.0510676	55.224	1.7455
GO:0009437	carnitine metabolic process	1	48	8	21206	0.0179682	0.0510676	55.224	1.7455
GO:0046500	S-adenosylmethionine metabolic process	1	48	8	21206	0.0179682	0.0510676	55.224	1.7455
GO:0030814	regulation of cAMP metabolic process	1	48	8	21206	0.0179682	0.0510676	55.224	1.7455
GO:0086069	bundle of His cell to Purkinje myocyte communication	1	48	8	21206	0.0179682	0.0510676	55.224	1.7455
GO:0019934	cGMP-mediated signaling	1	48	8	21206	0.0179682	0.0510676	55.224	1.7455
GO:0045986	negative regulation of smooth muscle contraction	1	48	8	21206	0.0179682	0.0510676	55.224	1.7455
GO:0050667	homocysteine metabolic process	1	48	8	21206	0.0179682	0.0510676	55.224	1.7455
GO:0060087	relaxation of vascular smooth muscle	1	48	8	21206	0.0179682	0.0510676	55.224	1.7455
GO:0046653	tetrahydrofolate metabolic process	1	48	8	21206	0.0179682	0.0510676	55.224	1.7455
GO:0071294	cellular response to zinc ion	1	48	8	21206	0.0179682	0.0510676	55.224	1.7455
GO:0060351	cartilage development involved in endochondral bone morphogenesis	1	48	9	21206	0.0201919	0.0539783	49.088	1.69482
GO:0006828	manganese ion transport	1	48	9	21206	0.0201919	0.0539783	49.088	1.69482
GO:0035999	tetrahydrofolate interconversion	1	48	9	21206	0.0201919	0.0539783	49.088	1.69482
GO:0034332	adherens junction organization	1	48	9	21206	0.0201919	0.0539783	49.088	1.69482
GO:0014050	negative regulation of glutamate secretion	1	48	9	21206	0.0201919	0.0539783	49.088	1.69482
GO:0006105	succinate metabolic process	1	48	9	21206	0.0201919	0.0539783	49.088	1.69482
GO:0032228	regulation of synaptic transmission, GABAergic	1	48	10	21206	0.0224106	0.0576274	44.1792	1.64955
GO:0019985	translesion synthesis	1	48	10	21206	0.0224106	0.0576274	44.1792	1.64955
GO:0042753	positive regulation of circadian rhythm	1	48	10	21206	0.0224106	0.0576274	44.1792	1.64955
GO:0033151	V(D)J recombination	1	48	10	21206	0.0224106	0.0576274	44.1792	1.64955
GO:0006812	cation transport	2	48	106	21206	0.0240457	0.0583211	8.33569	1.61896
GO:0021670	lateral ventricle development	1	48	11	21206	0.0246245	0.0583211	40.1629	1.60863
GO:0071276	cellular response to cadmium ion	1	48	11	21206	0.0246245	0.0583211	40.1629	1.60863
GO:2001141	regulation of RNA biosynthetic process	1	48	11	21206	0.0246245	0.0583211	40.1629	1.60863
GO:0045926	negative regulation of growth	1	48	11	21206	0.0246245	0.0583211	40.1629	1.60863
GO:0045822	negative regulation of heart contraction	1	48	11	21206	0.0246245	0.0583211	40.1629	1.60863
GO:1901653	cellular response to peptide	1	48	11	21206	0.0246245	0.0583211	40.1629	1.60863
GO:0009086	methionine biosynthetic process	1	48	11	21206	0.0246245	0.0583211	40.1629	1.60863
GO:0061003	positive regulation of dendritic spine morphogenesis	1	48	11	21206	0.0246245	0.0583211	40.1629	1.60863
GO:0048009	insulin-like growth factor receptor signaling pathway	1	48	12	21206	0.0268334	0.0619232	36.816	1.57132
GO:0046889	positive regulation of lipid biosynthetic process	1	48	12	21206	0.0268334	0.0619232	36.816	1.57132
GO:0006107	oxaloacetate metabolic process	1	48	12	21206	0.0268334	0.0619232	36.816	1.57132
GO:0007623	circadian rhythm	2	48	113	21206	0.0270713	0.0619428	7.81932	1.56749
GO:0001764	neuron migration	2	48	115	21206	0.0279627	0.062223	7.68333	1.55342
GO:0050673	epithelial cell proliferation	1	48	13	21206	0.0290374	0.062223	33.984	1.53704
GO:0060134	prepulse inhibition	1	48	13	21206	0.0290374	0.062223	33.984	1.53704
GO:0070208	protein heterotrimerization	1	48	13	21206	0.0290374	0.062223	33.984	1.53704
GO:0043087	regulation of GTPase activity	1	48	13	21206	0.0290374	0.062223	33.984	1.53704
GO:0001783	B cell apoptotic process	1	48	13	21206	0.0290374	0.062223	33.984	1.53704
GO:0045104	intermediate filament cytoskeleton organization	1	48	13	21206	0.0290374	0.062223	33.984	1.53704
GO:0051593	response to folic acid	1	48	13	21206	0.0290374	0.062223	33.984	1.53704
GO:0001822	kidney development	2	48	118	21206	0.0293218	0.0623377	7.48799	1.53281
GO:0007263	nitric oxide mediated signal transduction	1	48	14	21206	0.0312365	0.0638929	31.5565	1.50534
GO:0071577	zinc ion transmembrane transport	1	48	14	21206	0.0312365	0.0638929	31.5565	1.50534
GO:1901214	regulation of neuron death	1	48	14	21206	0.0312365	0.0638929	31.5565	1.50534
GO:0060993	kidney morphogenesis	1	48	14	21206	0.0312365	0.0638929	31.5565	1.50534
GO:0061512	protein localization to cilium	1	48	14	21206	0.0312365	0.0638929	31.5565	1.50534
GO:0001946	lymphangiogenesis	1	48	15	21206	0.0334308	0.06637	29.4528	1.47585
GO:0035082	axoneme assembly	1	48	15	21206	0.0334308	0.06637	29.4528	1.47585
GO:0014912	negative regulation of smooth muscle cell migration	1	48	15	21206	0.0334308	0.06637	29.4528	1.47585
GO:0007625	grooming behavior	1	48	15	21206	0.0334308	0.06637	29.4528	1.47585
GO:0042445	hormone metabolic process	1	48	16	21206	0.0356202	0.0691903	27.612	1.4483
GO:0045109	intermediate filament organization	1	48	16	21206	0.0356202	0.0691903	27.612	1.4483
GO:0021846	cell proliferation in forebrain	1	48	16	21206	0.0356202	0.0691903	27.612	1.4483
GO:0015695	organic cation transport	1	48	17	21206	0.0378047	0.0718822	25.9877	1.42245
GO:0042692	muscle cell differentiation	1	48	17	21206	0.0378047	0.0718822	25.9877	1.42245
GO:0006103	2-oxoglutarate metabolic process	1	48	17	21206	0.0378047	0.0718822	25.9877	1.42245
GO:0086005	ventricular cardiac muscle cell action potential	1	48	18	21206	0.0399844	0.0749707	24.544	1.39811
GO:0046328	regulation of JNK cascade	1	48	18	21206	0.0399844	0.0749707	24.544	1.39811
GO:0006261	DNA-dependent DNA replication	1	48	19	21206	0.0421593	0.0769121	23.2522	1.37511
GO:0001964	startle response	1	48	19	21206	0.0421593	0.0769121	23.2522	1.37511
GO:0006997	nucleus organization	1	48	19	21206	0.0421593	0.0769121	23.2522	1.37511
GO:0032094	response to food	1	48	19	21206	0.0421593	0.0769121	23.2522	1.37511
GO:0007163	establishment or maintenance of cell polarity	1	48	20	21206	0.0443293	0.0803282	22.0896	1.35331
GO:0086091	regulation of heart rate by cardiac conduction	1	48	21	21206	0.0464945	0.0820491	21.0377	1.3326
GO:0018149	peptide cross-linking	1	48	21	21206	0.0464945	0.0820491	21.0377	1.3326
GO:0009755	hormone-mediated signaling pathway	1	48	21	21206	0.0464945	0.0820491	21.0377	1.3326
GO:0018345	protein palmitoylation	1	48	21	21206	0.0464945	0.0820491	21.0377	1.3326
GO:0007259	JAK-STAT cascade	1	48	24	21206	0.0529613	0.09108	18.408	1.27604
GO:0010575	positive regulation vascular endothelial growth factor production	1	48	24	21206	0.0529613	0.09108	18.408	1.27604
GO:0043278	response to morphine	1	48	24	21206	0.0529613	0.09108	18.408	1.27604
GO:0046427	positive regulation of JAK-STAT cascade	1	48	24	21206	0.0529613	0.09108	18.408	1.27604
GO:0045672	positive regulation of osteoclast differentiation	1	48	25	21206	0.0551074	0.0929938	17.6717	1.25879
GO:0002040	sprouting angiogenesis	1	48	25	21206	0.0551074	0.0929938	17.6717	1.25879
GO:0016032	viral process	1	48	25	21206	0.0551074	0.0929938	17.6717	1.25879
GO:0051965	positive regulation of synapse assembly	1	48	28	21206	0.0615171	0.103165	15.7783	1.211
GO:0043200	response to amino acid	1	48	29	21206	0.0636441	0.106074	15.2342	1.19624
GO:0070509	calcium ion import	1	48	30	21206	0.0657665	0.108274	14.7264	1.182
GO:0001975	response to amphetamine	1	48	30	21206	0.0657665	0.108274	14.7264	1.182
GO:0031623	receptor internalization	1	48	31	21206	0.0678841	0.111083	14.2513	1.16823
GO:0040014	regulation of multicellular organism growth	1	48	32	21206	0.0699971	0.113169	13.806	1.15492
GO:0045909	positive regulation of vasodilation	1	48	32	21206	0.0699971	0.113169	13.806	1.15492
GO:0045494	photoreceptor cell maintenance	1	48	33	21206	0.0721053	0.115198	13.3876	1.14203
GO:0051281	positive regulation of release of sequestered calcium ion into cytosol	1	48	33	21206	0.0721053	0.115198	13.3876	1.14203
GO:0030282	bone mineralization	1	48	34	21206	0.0742089	0.116491	12.9939	1.12954
GO:0002088	lens development in camera-type eye	1	48	34	21206	0.0742089	0.116491	12.9939	1.12954
GO:0040018	positive regulation of multicellular organism growth	1	48	34	21206	0.0742089	0.116491	12.9939	1.12954
GO:0010595	positive regulation of endothelial cell migration	1	48	35	21206	0.0763078	0.118409	12.6226	1.11743
GO:0016358	dendrite development	1	48	35	21206	0.0763078	0.118409	12.6226	1.11743
GO:0001662	behavioral fear response	1	48	36	21206	0.078402	0.120963	12.272	1.10567
GO:0051402	neuron apoptotic process	1	48	41	21206	0.0888037	0.133206	10.7754	1.05157
GO:0032313	regulation of Rab GTPase activity	1	48	41	21206	0.0888037	0.133206	10.7754	1.05157
GO:0097191	extrinsic apoptotic signaling pathway	1	48	41	21206	0.0888037	0.133206	10.7754	1.05157
GO:1901215	negative regulation of neuron death	1	48	41	21206	0.0888037	0.133206	10.7754	1.05157
GO:0001656	metanephros development	1	48	41	21206	0.0888037	0.133206	10.7754	1.05157
GO:0060291	long-term synaptic potentiation	1	48	42	21206	0.0908702	0.135552	10.5188	1.04158
GO:0022008	neurogenesis	1	48	43	21206	0.0929321	0.137866	10.2742	1.03183
GO:0055085	transmembrane transport	3	48	478	21206	0.0936693	0.138201	2.77275	1.0284
GO:0021915	neural tube development	1	48	44	21206	0.0949895	0.139387	10.0407	1.02232
GO:0045597	positive regulation of cell differentiation	1	48	45	21206	0.0970422	0.141629	9.81759	1.01304
GO:0006959	humoral immune response	1	48	46	21206	0.0990904	0.143072	9.60417	1.00397
GO:0035019	somatic stem cell maintenance	1	48	46	21206	0.0990904	0.143072	9.60417	1.00397
GO:0003333	amino acid transmembrane transport	1	48	47	21206	0.101134	0.145246	9.39982	0.995103
GO:0001942	hair follicle development	1	48	48	21206	0.103173	0.146615	9.20399	0.986433
GO:0009267	cellular response to starvation	1	48	48	21206	0.103173	0.146615	9.20399	0.986433
GO:0007611	learning or memory	1	48	49	21206	0.105208	0.148723	9.01616	0.977952
GO:0071560	cellular response to transforming growth factor beta stimulus	1	48	50	21206	0.107238	0.150022	8.83583	0.969652
GO:0042752	regulation of circadian rhythm	1	48	50	21206	0.107238	0.150022	8.83583	0.969652
GO:0007368	determination of left/right symmetry	1	48	51	21206	0.109263	0.152068	8.66258	0.961525
GO:0006334	nucleosome assembly	1	48	52	21206	0.111284	0.154086	8.49599	0.953566
GO:0001947	heart looping	1	48	56	21206	0.119324	0.16354	7.88914	0.923273
GO:0030216	keratinocyte differentiation	1	48	56	21206	0.119324	0.16354	7.88914	0.923273
GO:0042733	embryonic digit morphogenesis	1	48	58	21206	0.123317	0.167314	7.6171	0.908978
GO:0051591	response to cAMP	1	48	58	21206	0.123317	0.167314	7.6171	0.908978
GO:0016485	protein processing	1	48	65	21206	0.137153	0.185157	6.79679	0.862795
GO:0032870	cellular response to hormone stimulus	1	48	67	21206	0.141067	0.189493	6.59391	0.850575
GO:0007224	smoothened signaling pathway	1	48	69	21206	0.144963	0.193763	6.40278	0.838742
GO:0030183	B cell differentiation	1	48	70	21206	0.146905	0.194433	6.31131	0.832964
GO:1903506	regulation of nucleic acid-templated transcription	1	48	70	21206	0.146905	0.194433	6.31131	0.832964
GO:0043010	camera-type eye development	1	48	72	21206	0.150775	0.197618	6.136	0.82167
GO:0032851	positive regulation of Rab GTPase activity	1	48	72	21206	0.150775	0.197618	6.136	0.82167
GO:0000187	activation of MAPK activity	1	48	77	21206	0.160376	0.209187	5.73755	0.794859
GO:0006811	ion transport	3	48	614	21206	0.161671	0.209649	2.15859	0.791369
GO:0060041	retina development in camera-type eye	1	48	78	21206	0.162284	0.209649	5.664	0.789725
GO:0032869	cellular response to insulin stimulus	1	48	81	21206	0.167981	0.215975	5.45422	0.774741
GO:0030900	forebrain development	1	48	83	21206	0.171758	0.219784	5.32279	0.765084
GO:0050731	positive regulation of peptidyl-tyrosine phosphorylation	1	48	84	21206	0.17364	0.221145	5.25942	0.760351
GO:0051384	response to glucocorticoid	1	48	85	21206	0.175518	0.222487	5.19755	0.75568
GO:0006874	cellular calcium ion homeostasis	1	48	88	21206	0.181126	0.22768	5.02036	0.742019
GO:0042493	response to drug	2	48	343	21206	0.181983	0.22768	2.57604	0.739969
GO:0043434	response to peptide hormone	1	48	89	21206	0.182987	0.22768	4.96395	0.737579
GO:0034097	response to cytokine	1	48	89	21206	0.182987	0.22768	4.96395	0.737579
GO:0090090	negative regulation of canonical Wnt signaling pathway	1	48	92	21206	0.188546	0.232454	4.80208	0.724582
GO:0042060	wound healing	1	48	92	21206	0.188546	0.232454	4.80208	0.724582
GO:0007229	integrin-mediated signaling pathway	1	48	93	21206	0.190391	0.232605	4.75045	0.720353
GO:0032355	response to estradiol	1	48	93	21206	0.190391	0.232605	4.75045	0.720353
GO:0030198	extracellular matrix organization	1	48	95	21206	0.194068	0.234971	4.65044	0.712045
GO:0010976	positive regulation of neuron projection development	1	48	95	21206	0.194068	0.234971	4.65044	0.712045
GO:0001501	skeletal system development	1	48	104	21206	0.210414	0.253624	4.248	0.676925
GO:0001649	osteoblast differentiation	1	48	107	21206	0.21579	0.258948	4.12889	0.665968
GO:0016337	single organismal cell-cell adhesion	1	48	108	21206	0.217574	0.259934	4.09066	0.662392
GO:0045766	positive regulation of angiogenesis	1	48	110	21206	0.221131	0.263019	4.01629	0.655351
GO:0006355	regulation of transcription, DNA-templated	7	48	2223	21206	0.234032	0.277143	1.39116	0.630725
GO:0007204	positive regulation of cytosolic calcium ion concentration	1	48	118	21206	0.235198	0.277308	3.744	0.628567
GO:0006260	DNA replication	1	48	121	21206	0.240409	0.282219	3.65117	0.61905
GO:0070374	positive regulation of ERK1 and ERK2 cascade	1	48	124	21206	0.245585	0.28581	3.56284	0.609798
GO:0030324	lung development	1	48	124	21206	0.245585	0.28581	3.56284	0.609798
GO:0006814	sodium ion transport	1	48	127	21206	0.250726	0.2893	3.47867	0.6008
GO:0007411	axon guidance	1	48	127	21206	0.250726	0.2893	3.47867	0.6008
GO:0048511	rhythmic process	1	48	129	21206	0.254135	0.291985	3.42474	0.594936
GO:0008152	metabolic process	5	48	1512	21206	0.255697	0.292535	1.46095	0.592274
GO:0043161	proteasome-mediated ubiquitin-dependent protein catabolic process	1	48	136	21206	0.265946	0.302976	3.24847	0.575207
GO:0043123	positive regulation of I-kappaB kinase/NF-kappaB signaling	1	48	145	21206	0.280863	0.318626	3.04684	0.551506
GO:0019221	cytokine-mediated signaling pathway	1	48	149	21206	0.287397	0.324674	2.96504	0.541518
GO:0006631	fatty acid metabolic process	1	48	156	21206	0.298692	0.336028	2.832	0.524777
GO:0008150	biological_process	17	48	6679	21206	0.328162	0.36765	1.12449	0.483912
GO:0051260	protein homooligomerization	1	48	179	21206	0.334583	0.373295	2.46811	0.475496
GO:0006897	endocytosis	1	48	180	21206	0.336102	0.373447	2.4544	0.473529
GO:0032259	methylation	1	48	183	21206	0.340639	0.376936	2.41416	0.467706
GO:0007155	cell adhesion	2	48	545	21206	0.350655	0.386436	1.62125	0.455121
GO:0001666	response to hypoxia	1	48	191	21206	0.352589	0.386988	2.31305	0.452732
GO:0006915	apoptotic process	2	48	565	21206	0.367112	0.401297	1.56386	0.435201
GO:0007507	heart development	1	48	203	21206	0.370117	0.40295	2.17631	0.431661
GO:0034220	ion transmembrane transport	1	48	208	21206	0.377282	0.407465	2.124	0.423334
GO:0016055	Wnt signaling pathway	1	48	208	21206	0.377282	0.407465	2.124	0.423334
GO:0005975	carbohydrate metabolic process	1	48	211	21206	0.381543	0.410425	2.0938	0.418456
GO:0007275	multicellular organismal development	3	48	1001	21206	0.396618	0.424948	1.32405	0.401628
GO:0001525	angiogenesis	1	48	225	21206	0.401053	0.428001	1.96352	0.396798
GO:0006351	transcription, DNA-templated	5	48	1852	21206	0.410262	0.436105	1.19274	0.386939
GO:0006810	transport	5	48	1914	21206	0.438832	0.464646	1.15411	0.357701
GO:0016568	chromatin modification	1	48	269	21206	0.458528	0.483604	1.64235	0.338634
GO:0000122	negative regulation of transcription from RNA polymerase II promoter	2	48	692	21206	0.467403	0.491046	1.27685	0.330308
GO:0016310	phosphorylation	2	48	702	21206	0.474926	0.497015	1.25867	0.323374
GO:0001701	in utero embryonic development	1	48	286	21206	0.479256	0.499611	1.54473	0.319432
GO:0006281	DNA repair	1	48	305	21206	0.501505	0.520793	1.4485	0.299725
GO:0055114	oxidation-reduction process	2	48	762	21206	0.518738	0.536625	1.15956	0.285052
GO:0006974	cellular response to DNA damage stimulus	1	48	392	21206	0.592047	0.610125	1.12702	0.227644
GO:0006357	regulation of transcription from RNA polymerase II promoter	1	48	427	21206	0.623741	0.640342	1.03464	0.204996
GO:0016567	protein ubiquitination	1	48	444	21206	0.638252	0.652758	0.995026	0.195008
GO:0006629	lipid metabolic process	1	48	457	21206	0.648978	0.661223	0.966721	0.18777
GO:0045892	negative regulation of transcription, DNA-templated	1	48	527	21206	0.701594	0.712144	0.838314	0.153914
GO:0006366	transcription from RNA polymerase II promoter	1	48	567	21206	0.728106	0.736287	0.779174	0.137805
GO:0006468	protein phosphorylation	1	48	615	21206	0.756888	0.762537	0.71836	0.120968
GO:0006508	proteolysis	1	48	662	21206	0.782172	0.785079	0.667359	0.106698
GO:0007165	signal transduction	1	48	2388	21206	0.99679	0.99679	0.185005	0.00139654
