# Supplementary material for: Cognitive impairment and transcriptomic profile in hippocampus of young mice after multiple neonatal exposures to sevoflurane
Source: Aging (Albany NY). 2019 Oct 3;11(19):8386–417. doi: 10.18632/aging.102326 (PMC6814607; doi:10.18632/aging.102326)
Supplement: Supplementary Table 5 [file aging-11-102326-s008.xlsx]

## Sheet: DownGO_Result
Supplementary Table 5. All GO terms of biological process associated with down-regulated DEGs.
GOID	GOTerm	DifGene	AllDifGene	GeneInGO	AllGene	P-Value	FDR	Enrichment	(-log10P)
GO:0034765	regulation of ion transmembrane transport	16	258	179	21206	6.58691e-10	8.64202e-07	7.34693	9.18132
GO:0071805	potassium ion transmembrane transport	12	258	130	21206	6.59108e-08	3.71504e-05	7.58712	7.18104
GO:0006813	potassium ion transport	12	258	133	21206	8.49475e-08	3.71504e-05	7.41598	7.07085
GO:0000122	negative regulation of transcription from RNA polymerase II promoter	24	258	692	21206	4.43123e-06	0.00145344	2.85065	5.35348
GO:0007399	nervous system development	16	258	358	21206	8.85766e-06	0.00232425	3.67347	5.05268
GO:0018105	peptidyl-serine phosphorylation	8	258	94	21206	1.94469e-05	0.00412967	6.99522	4.71115
GO:0006811	ion transport	21	258	614	21206	2.20333e-05	0.00412967	2.81119	4.65692
GO:0006887	exocytosis	8	258	102	21206	3.52408e-05	0.00577949	6.44657	4.45295
GO:0007416	synapse assembly	5	258	33	21206	4.606e-05	0.00671453	12.4536	4.33668
GO:0016310	phosphorylation	22	258	702	21206	5.21944e-05	0.0068479	2.57587	4.28238
GO:0021902	commitment of neuronal cell to specific neuron type in forebrain	3	258	7	21206	6.00923e-05	0.00716738	35.2259	4.22118
GO:0006468	protein phosphorylation	20	258	615	21206	6.97091e-05	0.00753094	2.67297	4.15671
GO:0006357	regulation of transcription from RNA polymerase II promoter	16	258	427	21206	7.46206e-05	0.00753094	3.07986	4.12714
GO:0014740	negative regulation of muscle hyperplasia	2	258	2	21206	0.000147454	0.0138185	82.1938	3.83134
GO:0070373	negative regulation of ERK1 and ERK2 cascade	5	258	43	21206	0.000169186	0.0147982	9.55742	3.77163
GO:0010107	potassium ion import	4	258	24	21206	0.000187775	0.0153976	13.699	3.72636
GO:0010801	negative regulation of peptidyl-threonine phosphorylation	3	258	11	21206	0.00027324	0.0210877	22.4165	3.56346
GO:0060080	regulation of inhibitory postsynaptic membrane potential	3	258	12	21206	0.000361049	0.0263165	20.5484	3.44243
GO:0033605	positive regulation of catecholamine secretion	2	258	3	21206	0.000438801	0.0287853	54.7959	3.35773
GO:1902667	regulation of axon guidance	2	258	3	21206	0.000438801	0.0287853	54.7959	3.35773
GO:0021895	cerebral cortex neuron differentiation	3	258	13	21206	0.000465152	0.0290609	18.9678	3.33241
GO:0006810	transport	40	258	1914	21206	0.000510807	0.0304627	1.71774	3.29174
GO:0042391	regulation of membrane potential	6	258	87	21206	0.000678503	0.0360927	5.66854	3.16845
GO:0071236	cellular response to antibiotic	3	258	15	21206	0.000726805	0.0360927	16.4388	3.13858
GO:0006171	cAMP biosynthetic process	3	258	15	21206	0.000726805	0.0360927	16.4388	3.13858
GO:0060292	long term synaptic depression	3	258	15	21206	0.000726805	0.0360927	16.4388	3.13858
GO:0031175	neuron projection development	7	258	122	21206	0.000742761	0.0360927	4.71604	3.12915
GO:0034261	negative regulation of Ras GTPase activity	2	258	4	21206	0.000870545	0.0401072	41.0969	3.06021
GO:0032456	endocytic recycling	3	258	16	21206	0.000886517	0.0401072	15.4113	3.05231
GO:0048662	negative regulation of smooth muscle cell proliferation	4	258	36	21206	0.000928358	0.0406002	9.13264	3.03228
GO:0006351	transcription, DNA-templated	38	258	1852	21206	0.00100546	0.0425537	1.68648	2.99764
GO:0071310	cellular response to organic substance	4	258	38	21206	0.00114142	0.0460117	8.65198	2.94255
GO:0034976	response to endoplasmic reticulum stress	5	258	65	21206	0.00116849	0.0460117	6.3226	2.93237
GO:0045893	positive regulation of transcription, DNA-templated	16	258	549	21206	0.00119238	0.0460117	2.39545	2.92359
GO:0007275	multicellular organismal development	24	258	1001	21206	0.00124607	0.0467099	1.97068	2.90446
GO:0018107	peptidyl-threonine phosphorylation	4	258	40	21206	0.00138658	0.0505333	8.21938	2.85805
GO:1900103	positive regulation of endoplasmic reticulum unfolded protein response	2	258	5	21206	0.00143925	0.0510351	32.8775	2.84186
GO:0043542	endothelial cell migration	3	258	19	21206	0.00149318	0.0515541	12.978	2.82589
GO:0006366	transcription from RNA polymerase II promoter	16	258	567	21206	0.0016583	0.0546537	2.3194	2.78034
GO:0021762	substantia nigra development	4	258	42	21206	0.00166627	0.0546537	7.82798	2.77825
GO:0008104	protein localization	5	258	74	21206	0.00208603	0.0650273	5.55364	2.68068
GO:0071499	cellular response to laminar fluid shear stress	2	258	6	21206	0.00214155	0.0650273	27.3979	2.66927
GO:0048664	neuron fate determination	2	258	6	21206	0.00214155	0.0650273	27.3979	2.66927
GO:0006914	autophagy	6	258	109	21206	0.00218079	0.0650273	4.52443	2.66139
GO:0009190	cyclic nucleotide biosynthetic process	3	258	22	21206	0.00231005	0.0652099	11.2082	2.63638
GO:0006836	neurotransmitter transport	4	258	46	21206	0.00233886	0.0652099	7.14729	2.631
GO:0006355	regulation of transcription, DNA-templated	42	258	2223	21206	0.00262394	0.0652099	1.55292	2.58105
GO:0010975	regulation of neuron projection development	3	258	23	21206	0.00263286	0.0652099	10.7209	2.57957
GO:2001259	positive regulation of cation channel activity	2	258	7	21206	0.00297414	0.0652099	23.4839	2.52664
GO:0014047	glutamate secretion	2	258	7	21206	0.00297414	0.0652099	23.4839	2.52664
GO:0021796	cerebral cortex regionalization	2	258	7	21206	0.00297414	0.0652099	23.4839	2.52664
GO:1901800	positive regulation of proteasomal protein catabolic process	2	258	7	21206	0.00297414	0.0652099	23.4839	2.52664
GO:0021955	central nervous system neuron axonogenesis	2	258	7	21206	0.00297414	0.0652099	23.4839	2.52664
GO:1990138	neuron projection extension	2	258	7	21206	0.00297414	0.0652099	23.4839	2.52664
GO:0010807	regulation of synaptic vesicle priming	2	258	7	21206	0.00297414	0.0652099	23.4839	2.52664
GO:0007196	adenylate cyclase-inhibiting G-protein coupled glutamate receptor signaling pathway	2	258	7	21206	0.00297414	0.0652099	23.4839	2.52664
GO:2000300	regulation of synaptic vesicle exocytosis	2	258	7	21206	0.00297414	0.0652099	23.4839	2.52664
GO:0048821	erythrocyte development	3	258	24	21206	0.00298216	0.0652099	10.2742	2.52547
GO:0032312	regulation of ARF GTPase activity	3	258	24	21206	0.00298216	0.0652099	10.2742	2.52547
GO:0046580	negative regulation of Ras protein signal transduction	3	258	24	21206	0.00298216	0.0652099	10.2742	2.52547
GO:0006986	response to unfolded protein	4	258	50	21206	0.00317811	0.0683554	6.5755	2.49783
GO:0042493	response to drug	11	258	343	21206	0.00334559	0.070797	2.63595	2.47553
GO:0008285	negative regulation of cell proliferation	11	258	346	21206	0.00357244	0.0743975	2.6131	2.44703
GO:0045773	positive regulation of axon extension	3	258	26	21206	0.0037629	0.0758984	9.4839	2.42448
GO:0002070	epithelial cell maturation	2	258	8	21206	0.00393376	0.0758984	20.5484	2.40519
GO:0051973	positive regulation of telomerase activity	2	258	8	21206	0.00393376	0.0758984	20.5484	2.40519
GO:0086002	cardiac muscle cell action potential involved in contraction	2	258	8	21206	0.00393376	0.0758984	20.5484	2.40519
GO:0060074	synapse maturation	2	258	8	21206	0.00393376	0.0758984	20.5484	2.40519
GO:0007269	neurotransmitter secretion	3	258	27	21206	0.00419559	0.0787628	9.13264	2.37721
GO:0035914	skeletal muscle cell differentiation	4	258	54	21206	0.00420228	0.0787628	6.08843	2.37651
GO:0007411	axon guidance	6	258	127	21206	0.00464903	0.0848659	3.88317	2.33264
GO:0070059	intrinsic apoptotic signaling pathway in response to endoplasmic reticulum stress	3	258	28	21206	0.00465727	0.0848659	8.80648	2.33187
GO:0007612	learning	4	258	56	21206	0.00478919	0.0854882	5.87099	2.31974
GO:0042446	hormone biosynthetic process	2	258	9	21206	0.00501722	0.0854882	18.2653	2.29954
GO:0003084	positive regulation of systemic arterial blood pressure	2	258	9	21206	0.00501722	0.0854882	18.2653	2.29954
GO:0043254	regulation of protein complex assembly	2	258	9	21206	0.00501722	0.0854882	18.2653	2.29954
GO:0035414	negative regulation of catenin import into nucleus	2	258	9	21206	0.00501722	0.0854882	18.2653	2.29954
GO:0043401	steroid hormone mediated signaling pathway	4	258	57	21206	0.00510227	0.0858228	5.76799	2.29224
GO:0032355	response to estradiol	5	258	93	21206	0.00558874	0.0918355	4.41902	2.25269
GO:0010506	regulation of autophagy	3	258	30	21206	0.00566972	0.0918355	8.21938	2.24644
GO:0000422	mitochondrion degradation	3	258	30	21206	0.00566972	0.0918355	8.21938	2.24644
GO:0051895	negative regulation of focal adhesion assembly	2	258	10	21206	0.00622139	0.0938215	16.4388	2.20611
GO:0021707	cerebellar granule cell differentiation	2	258	10	21206	0.00622139	0.0938215	16.4388	2.20611
GO:0060052	neurofilament cytoskeleton organization	2	258	10	21206	0.00622139	0.0938215	16.4388	2.20611
GO:0042403	thyroid hormone metabolic process	2	258	10	21206	0.00622139	0.0938215	16.4388	2.20611
GO:0048515	spermatid differentiation	2	258	10	21206	0.00622139	0.0938215	16.4388	2.20611
GO:0048730	epidermis morphogenesis	2	258	10	21206	0.00622139	0.0938215	16.4388	2.20611
GO:0051260	protein homooligomerization	7	258	179	21206	0.00643614	0.0940362	3.21428	2.19137
GO:0001525	angiogenesis	8	258	225	21206	0.00646025	0.0940362	2.92245	2.18975
GO:0007626	locomotory behavior	5	258	97	21206	0.00666524	0.0940362	4.23679	2.17618
GO:0061077	chaperone-mediated protein folding	3	258	32	21206	0.00680416	0.0940362	7.70567	2.16723
GO:0014067	negative regulation of phosphatidylinositol 3-kinase signaling	2	258	11	21206	0.00754321	0.0940362	14.9443	2.12244
GO:0001542	ovulation from ovarian follicle	2	258	11	21206	0.00754321	0.0940362	14.9443	2.12244
GO:1901653	cellular response to peptide	2	258	11	21206	0.00754321	0.0940362	14.9443	2.12244
GO:1900006	positive regulation of dendrite development	2	258	11	21206	0.00754321	0.0940362	14.9443	2.12244
GO:0030166	proteoglycan biosynthetic process	2	258	11	21206	0.00754321	0.0940362	14.9443	2.12244
GO:0050680	negative regulation of epithelial cell proliferation	4	258	64	21206	0.00768337	0.0940362	5.13711	2.11445
GO:0051898	negative regulation of protein kinase B signaling	3	258	34	21206	0.00806402	0.0940362	7.25239	2.09345
GO:0000086	G2/M transition of mitotic cell cycle	3	258	34	21206	0.00806402	0.0940362	7.25239	2.09345
GO:0043523	regulation of neuron apoptotic process	3	258	34	21206	0.00806402	0.0940362	7.25239	2.09345
GO:0034504	protein localization to nucleus	3	258	34	21206	0.00806402	0.0940362	7.25239	2.09345
GO:0045665	negative regulation of neuron differentiation	4	258	66	21206	0.00855307	0.0940362	4.98144	2.06788
GO:0045787	positive regulation of cell cycle	3	258	35	21206	0.00874192	0.0940362	7.04518	2.05839
GO:0016358	dendrite development	3	258	35	21206	0.00874192	0.0940362	7.04518	2.05839
GO:0030168	platelet activation	3	258	35	21206	0.00874192	0.0940362	7.04518	2.05839
GO:0045744	negative regulation of G-protein coupled receptor protein signaling pathway	2	258	12	21206	0.00897964	0.0940362	13.699	2.04674
GO:0007613	memory	4	258	69	21206	0.00997438	0.0940362	4.76486	2.00111
GO:0031629	synaptic vesicle fusion to presynaptic membrane	2	258	13	21206	0.0105277	0.0940362	12.6452	1.97767
GO:0031396	regulation of protein ubiquitination	2	258	13	21206	0.0105277	0.0940362	12.6452	1.97767
GO:0045104	intermediate filament cytoskeleton organization	2	258	13	21206	0.0105277	0.0940362	12.6452	1.97767
GO:0032854	positive regulation of Rap GTPase activity	2	258	13	21206	0.0105277	0.0940362	12.6452	1.97767
GO:0043087	regulation of GTPase activity	2	258	13	21206	0.0105277	0.0940362	12.6452	1.97767
GO:0031647	regulation of protein stability	3	258	38	21206	0.0109713	0.0940362	6.48898	1.95974
GO:0071260	cellular response to mechanical stimulus	4	258	71	21206	0.0110021	0.0940362	4.63064	1.95852
GO:0042472	inner ear morphogenesis	4	258	72	21206	0.0115406	0.0940362	4.56632	1.93777
GO:0030522	intracellular receptor signaling pathway	3	258	39	21206	0.0117806	0.0940362	6.3226	1.92883
GO:0072105	ureteric peristalsis	1	258	1	21206	0.0121664	0.0940362	82.1938	1.91484
GO:1900146	negative regulation of nodal signaling pathway involved in determination of left/right asymmetry	1	258	1	21206	0.0121664	0.0940362	82.1938	1.91484
GO:0002014	vasoconstriction of artery involved in ischemic response to lowering of systemic arterial blood pressure	1	258	1	21206	0.0121664	0.0940362	82.1938	1.91484
GO:0010092	specification of organ identity	1	258	1	21206	0.0121664	0.0940362	82.1938	1.91484
GO:0072110	glomerular mesangial cell proliferation	1	258	1	21206	0.0121664	0.0940362	82.1938	1.91484
GO:1902512	positive regulation of apoptotic DNA fragmentation	1	258	1	21206	0.0121664	0.0940362	82.1938	1.91484
GO:0072303	positive regulation of glomerular metanephric mesangial cell proliferation	1	258	1	21206	0.0121664	0.0940362	82.1938	1.91484
GO:1900100	positive regulation of plasma cell differentiation	1	258	1	21206	0.0121664	0.0940362	82.1938	1.91484
GO:0003108	negative regulation of the force of heart contraction by chemical signal	1	258	1	21206	0.0121664	0.0940362	82.1938	1.91484
GO:1903489	positive regulation of lactation	1	258	1	21206	0.0121664	0.0940362	82.1938	1.91484
GO:0021822	negative regulation of cell motility involved in cerebral cortex radial glia guided migration	1	258	1	21206	0.0121664	0.0940362	82.1938	1.91484
GO:1902178	fibroblast growth factor receptor apoptotic signaling pathway	1	258	1	21206	0.0121664	0.0940362	82.1938	1.91484
GO:0021814	cell motility involved in cerebral cortex radial glia guided migration	1	258	1	21206	0.0121664	0.0940362	82.1938	1.91484
GO:0051041	positive regulation of calcium-independent cell-cell adhesion	1	258	1	21206	0.0121664	0.0940362	82.1938	1.91484
GO:0003167	atrioventricular bundle cell differentiation	1	258	1	21206	0.0121664	0.0940362	82.1938	1.91484
GO:0072195	kidney smooth muscle cell differentiation	1	258	1	21206	0.0121664	0.0940362	82.1938	1.91484
GO:0006463	steroid hormone receptor complex assembly	1	258	1	21206	0.0121664	0.0940362	82.1938	1.91484
GO:0031658	negative regulation of cyclin-dependent protein serine/threonine kinase activity involved in G1/S transition of mitotic cell cycle	1	258	1	21206	0.0121664	0.0940362	82.1938	1.91484
GO:0032976	release of matrix enzymes from mitochondria	1	258	1	21206	0.0121664	0.0940362	82.1938	1.91484
GO:2000808	negative regulation of synaptic vesicle clustering	1	258	1	21206	0.0121664	0.0940362	82.1938	1.91484
GO:0007008	outer mitochondrial membrane organization	1	258	1	21206	0.0121664	0.0940362	82.1938	1.91484
GO:0043380	regulation of memory T cell differentiation	1	258	1	21206	0.0121664	0.0940362	82.1938	1.91484
GO:0070977	bone maturation	1	258	1	21206	0.0121664	0.0940362	82.1938	1.91484
GO:0086047	membrane depolarization during Purkinje myocyte cell action potential	1	258	1	21206	0.0121664	0.0940362	82.1938	1.91484
GO:0021572	rhombomere 6 development	1	258	1	21206	0.0121664	0.0940362	82.1938	1.91484
GO:0014806	smooth muscle hyperplasia	1	258	1	21206	0.0121664	0.0940362	82.1938	1.91484
GO:0014861	regulation of skeletal muscle contraction via regulation of action potential	1	258	1	21206	0.0121664	0.0940362	82.1938	1.91484
GO:0048640	negative regulation of developmental growth	1	258	1	21206	0.0121664	0.0940362	82.1938	1.91484
GO:0001777	T cell homeostatic proliferation	1	258	1	21206	0.0121664	0.0940362	82.1938	1.91484
GO:0002209	behavioral defense response	1	258	1	21206	0.0121664	0.0940362	82.1938	1.91484
GO:0035585	calcium-mediated signaling using extracellular calcium source	1	258	1	21206	0.0121664	0.0940362	82.1938	1.91484
GO:0042092	type 2 immune response	1	258	1	21206	0.0121664	0.0940362	82.1938	1.91484
GO:0072227	metanephric macula densa development	1	258	1	21206	0.0121664	0.0940362	82.1938	1.91484
GO:0098629	trans-Golgi network membrane organization	1	258	1	21206	0.0121664	0.0940362	82.1938	1.91484
GO:0072240	metanephric DCT cell differentiation	1	258	1	21206	0.0121664	0.0940362	82.1938	1.91484
GO:0071386	cellular response to corticosterone stimulus	1	258	1	21206	0.0121664	0.0940362	82.1938	1.91484
GO:0038101	sequestering of nodal from receptor via nodal binding	1	258	1	21206	0.0121664	0.0940362	82.1938	1.91484
GO:0030844	positive regulation of intermediate filament depolymerization	1	258	1	21206	0.0121664	0.0940362	82.1938	1.91484
GO:0045075	regulation of interleukin-12 biosynthetic process	1	258	1	21206	0.0121664	0.0940362	82.1938	1.91484
GO:0060691	epithelial cell maturation involved in salivary gland development	1	258	1	21206	0.0121664	0.0940362	82.1938	1.91484
GO:0003061	positive regulation of the force of heart contraction by norepinephrine	1	258	1	21206	0.0121664	0.0940362	82.1938	1.91484
GO:0060096	serotonin secretion, neurotransmission	1	258	1	21206	0.0121664	0.0940362	82.1938	1.91484
GO:0021966	corticospinal neuron axon guidance	1	258	1	21206	0.0121664	0.0940362	82.1938	1.91484
GO:1903298	negative regulation of hypoxia-induced intrinsic apoptotic signaling pathway	1	258	1	21206	0.0121664	0.0940362	82.1938	1.91484
GO:1990117	B cell receptor apoptotic signaling pathway	1	258	1	21206	0.0121664	0.0940362	82.1938	1.91484
GO:0035437	maintenance of protein localization in endoplasmic reticulum	1	258	1	21206	0.0121664	0.0940362	82.1938	1.91484
GO:0070460	thyroid-stimulating hormone secretion	1	258	1	21206	0.0121664	0.0940362	82.1938	1.91484
GO:0033233	regulation of protein sumoylation	1	258	1	21206	0.0121664	0.0940362	82.1938	1.91484
GO:0071317	cellular response to isoquinoline alkaloid	1	258	1	21206	0.0121664	0.0940362	82.1938	1.91484
GO:0002502	peptide antigen assembly with MHC class I protein complex	1	258	1	21206	0.0121664	0.0940362	82.1938	1.91484
GO:2000576	positive regulation of microtubule motor activity	1	258	1	21206	0.0121664	0.0940362	82.1938	1.91484
GO:1901731	positive regulation of platelet aggregation	1	258	1	21206	0.0121664	0.0940362	82.1938	1.91484
GO:0035136	forelimb morphogenesis	2	258	14	21206	0.0121846	0.0940362	11.742	1.91419
GO:0060993	kidney morphogenesis	2	258	14	21206	0.0121846	0.0940362	11.742	1.91419
GO:0035249	synaptic transmission, glutamatergic	3	258	41	21206	0.0134998	0.102975	6.01418	1.86967
GO:0045600	positive regulation of fat cell differentiation	3	258	41	21206	0.0134998	0.102975	6.01418	1.86967
GO:0021542	dentate gyrus development	2	258	15	21206	0.0139473	0.103383	10.9592	1.85551
GO:0050877	neurological system process	2	258	15	21206	0.0139473	0.103383	10.9592	1.85551
GO:0086004	regulation of cardiac muscle cell contraction	2	258	15	21206	0.0139473	0.103383	10.9592	1.85551
GO:1902236	negative regulation of endoplasmic reticulum stress-induced intrinsic apoptotic signaling pathway	2	258	15	21206	0.0139473	0.103383	10.9592	1.85551
GO:0021680	cerebellar Purkinje cell layer development	2	258	15	21206	0.0139473	0.103383	10.9592	1.85551
GO:0007266	Rho protein signal transduction	3	258	42	21206	0.0144101	0.10562	5.87099	1.84133
GO:0060291	long-term synaptic potentiation	3	258	42	21206	0.0144101	0.10562	5.87099	1.84133
GO:0030308	negative regulation of cell growth	5	258	119	21206	0.0152574	0.110686	3.45352	1.81652
GO:0035176	social behavior	3	258	43	21206	0.0153544	0.110686	5.73445	1.81377
GO:0010977	negative regulation of neuron projection development	3	258	43	21206	0.0153544	0.110686	5.73445	1.81377
GO:0061028	establishment of endothelial barrier	2	258	16	21206	0.0158131	0.110946	10.2742	1.80098
GO:0021799	cerebral cortex radially oriented cell migration	2	258	16	21206	0.0158131	0.110946	10.2742	1.80098
GO:0048870	cell motility	2	258	16	21206	0.0158131	0.110946	10.2742	1.80098
GO:0017156	calcium ion-dependent exocytosis	2	258	16	21206	0.0158131	0.110946	10.2742	1.80098
GO:0048745	smooth muscle tissue development	2	258	16	21206	0.0158131	0.110946	10.2742	1.80098
GO:0030154	cell differentiation	16	258	723	21206	0.015974	0.111478	1.81895	1.79658
GO:0000045	autophagic vacuole assembly	3	258	44	21206	0.0163328	0.112782	5.60412	1.78694
GO:0030514	negative regulation of BMP signaling pathway	3	258	44	21206	0.0163328	0.112782	5.60412	1.78694
GO:0009749	response to glucose	4	258	81	21206	0.0171565	0.115368	4.05895	1.76557
GO:0032024	positive regulation of insulin secretion	3	258	45	21206	0.0173454	0.115368	5.47959	1.76082
GO:0071480	cellular response to gamma radiation	2	258	17	21206	0.0177793	0.115368	9.66986	1.75009
GO:2000311	regulation of alpha-amino-3-hydroxy-5-methyl-4-isoxazole propionate selective glutamate receptor activity	2	258	17	21206	0.0177793	0.115368	9.66986	1.75009
GO:0071456	cellular response to hypoxia	4	258	82	21206	0.0178688	0.115368	4.00945	1.74791
GO:0070374	positive regulation of ERK1 and ERK2 cascade	5	258	124	21206	0.0179219	0.115368	3.31427	1.74662
GO:0071320	cellular response to cAMP	3	258	46	21206	0.0183924	0.115368	5.36047	1.73536
GO:0030900	forebrain development	4	258	83	21206	0.0185992	0.115368	3.96115	1.73051
GO:0016477	cell migration	6	258	173	21206	0.019426	0.115368	2.85065	1.71162
GO:0002028	regulation of sodium ion transport	2	258	18	21206	0.0198431	0.115368	9.13264	1.70239
GO:0048854	brain morphogenesis	2	258	18	21206	0.0198431	0.115368	9.13264	1.70239
GO:0017015	regulation of transforming growth factor beta receptor signaling pathway	2	258	18	21206	0.0198431	0.115368	9.13264	1.70239
GO:0071901	negative regulation of protein serine/threonine kinase activity	2	258	18	21206	0.0198431	0.115368	9.13264	1.70239
GO:0030512	negative regulation of transforming growth factor beta receptor signaling pathway	3	258	48	21206	0.0205896	0.115368	5.13711	1.68635
GO:0048511	rhythmic process	5	258	129	21206	0.0208772	0.115368	3.18581	1.68033
GO:0007611	learning or memory	3	258	49	21206	0.0217399	0.115368	5.03227	1.66274
GO:0033198	response to ATP	2	258	19	21206	0.0220019	0.115368	8.65198	1.65754
GO:0090102	cochlea development	2	258	19	21206	0.0220019	0.115368	8.65198	1.65754
GO:0090398	cellular senescence	2	258	19	21206	0.0220019	0.115368	8.65198	1.65754
GO:0007190	activation of adenylate cyclase activity	2	258	19	21206	0.0220019	0.115368	8.65198	1.65754
GO:0043547	positive regulation of GTPase activity	8	258	281	21206	0.0221354	0.115368	2.34004	1.65491
GO:0042752	regulation of circadian rhythm	3	258	50	21206	0.0229246	0.115368	4.93163	1.6397
GO:0030178	negative regulation of Wnt signaling pathway	3	258	51	21206	0.0241439	0.115368	4.83493	1.61719
GO:1902310	positive regulation of peptidyl-serine dephosphorylation	1	258	2	21206	0.0241853	0.115368	41.0969	1.61645
GO:0061418	regulation of transcription from RNA polymerase II promoter in response to hypoxia	1	258	2	21206	0.0241853	0.115368	41.0969	1.61645
GO:0036273	response to statin	1	258	2	21206	0.0241853	0.115368	41.0969	1.61645
GO:0048087	positive regulation of developmental pigmentation	1	258	2	21206	0.0241853	0.115368	41.0969	1.61645
GO:1903202	negative regulation of oxidative stress-induced cell death	1	258	2	21206	0.0241853	0.115368	41.0969	1.61645
GO:0032764	negative regulation of mast cell cytokine production	1	258	2	21206	0.0241853	0.115368	41.0969	1.61645
GO:0021852	pyramidal neuron migration	1	258	2	21206	0.0241853	0.115368	41.0969	1.61645
GO:0060180	female mating behavior	1	258	2	21206	0.0241853	0.115368	41.0969	1.61645
GO:0031111	negative regulation of microtubule polymerization or depolymerization	1	258	2	21206	0.0241853	0.115368	41.0969	1.61645
GO:1990418	response to insulin-like growth factor stimulus	1	258	2	21206	0.0241853	0.115368	41.0969	1.61645
GO:0046884	follicle-stimulating hormone secretion	1	258	2	21206	0.0241853	0.115368	41.0969	1.61645
GO:0021761	limbic system development	1	258	2	21206	0.0241853	0.115368	41.0969	1.61645
GO:0021589	cerebellum structural organization	1	258	2	21206	0.0241853	0.115368	41.0969	1.61645
GO:2000850	negative regulation of glucocorticoid secretion	1	258	2	21206	0.0241853	0.115368	41.0969	1.61645
GO:0090527	actin filament reorganization	1	258	2	21206	0.0241853	0.115368	41.0969	1.61645
GO:0007092	activation of mitotic anaphase-promoting complex activity	1	258	2	21206	0.0241853	0.115368	41.0969	1.61645
GO:0001300	chronological cell aging	1	258	2	21206	0.0241853	0.115368	41.0969	1.61645
GO:0070560	protein secretion by platelet	1	258	2	21206	0.0241853	0.115368	41.0969	1.61645
GO:0071409	cellular response to cycloheximide	1	258	2	21206	0.0241853	0.115368	41.0969	1.61645
GO:0045136	development of secondary sexual characteristics	1	258	2	21206	0.0241853	0.115368	41.0969	1.61645
GO:0050975	sensory perception of touch	1	258	2	21206	0.0241853	0.115368	41.0969	1.61645
GO:0048669	collateral sprouting in absence of injury	1	258	2	21206	0.0241853	0.115368	41.0969	1.61645
GO:0006808	regulation of nitrogen utilization	1	258	2	21206	0.0241853	0.115368	41.0969	1.61645
GO:0002358	B cell homeostatic proliferation	1	258	2	21206	0.0241853	0.115368	41.0969	1.61645
GO:0070278	extracellular matrix constituent secretion	1	258	2	21206	0.0241853	0.115368	41.0969	1.61645
GO:0002352	B cell negative selection	1	258	2	21206	0.0241853	0.115368	41.0969	1.61645
GO:0072233	metanephric thick ascending limb development	1	258	2	21206	0.0241853	0.115368	41.0969	1.61645
GO:0072236	metanephric loop of Henle development	1	258	2	21206	0.0241853	0.115368	41.0969	1.61645
GO:0060206	estrous cycle phase	1	258	2	21206	0.0241853	0.115368	41.0969	1.61645
GO:0070483	detection of hypoxia	1	258	2	21206	0.0241853	0.115368	41.0969	1.61645
GO:0060437	lung growth	1	258	2	21206	0.0241853	0.115368	41.0969	1.61645
GO:0006776	vitamin A metabolic process	1	258	2	21206	0.0241853	0.115368	41.0969	1.61645
GO:0048332	mesoderm morphogenesis	1	258	2	21206	0.0241853	0.115368	41.0969	1.61645
GO:0090076	relaxation of skeletal muscle	1	258	2	21206	0.0241853	0.115368	41.0969	1.61645
GO:0090071	negative regulation of ribosome biogenesis	1	258	2	21206	0.0241853	0.115368	41.0969	1.61645
GO:0003057	regulation of the force of heart contraction by chemical signal	1	258	2	21206	0.0241853	0.115368	41.0969	1.61645
GO:1902047	polyamine transmembrane transport	1	258	2	21206	0.0241853	0.115368	41.0969	1.61645
GO:1903384	negative regulation of hydrogen peroxide-induced neuron intrinsic apoptotic signaling pathway	1	258	2	21206	0.0241853	0.115368	41.0969	1.61645
GO:1903382	negative regulation of endoplasmic reticulum stress-induced neuron intrinsic apoptotic signaling pathway	1	258	2	21206	0.0241853	0.115368	41.0969	1.61645
GO:0021933	radial glia guided migration of cerebellar granule cell	1	258	2	21206	0.0241853	0.115368	41.0969	1.61645
GO:0006542	glutamine biosynthetic process	1	258	2	21206	0.0241853	0.115368	41.0969	1.61645
GO:0051386	regulation of neurotrophin TRK receptor signaling pathway	1	258	2	21206	0.0241853	0.115368	41.0969	1.61645
GO:0019676	ammonia assimilation cycle	1	258	2	21206	0.0241853	0.115368	41.0969	1.61645
GO:0061144	alveolar secondary septum development	1	258	2	21206	0.0241853	0.115368	41.0969	1.61645
GO:0042404	thyroid hormone catabolic process	1	258	2	21206	0.0241853	0.115368	41.0969	1.61645
GO:1902269	positive regulation of polyamine transmembrane transport	1	258	2	21206	0.0241853	0.115368	41.0969	1.61645
GO:0046985	positive regulation of hemoglobin biosynthetic process	1	258	2	21206	0.0241853	0.115368	41.0969	1.61645
GO:0070831	basement membrane assembly	1	258	2	21206	0.0241853	0.115368	41.0969	1.61645
GO:0032782	bile acid secretion	1	258	2	21206	0.0241853	0.115368	41.0969	1.61645
GO:0045684	positive regulation of epidermis development	1	258	2	21206	0.0241853	0.115368	41.0969	1.61645
GO:0002902	regulation of B cell apoptotic process	1	258	2	21206	0.0241853	0.115368	41.0969	1.61645
GO:0032535	regulation of cellular component size	1	258	2	21206	0.0241853	0.115368	41.0969	1.61645
GO:0001844	protein insertion into mitochondrial membrane involved in apoptotic signaling pathway	1	258	2	21206	0.0241853	0.115368	41.0969	1.61645
GO:0051081	nuclear envelope disassembly	1	258	2	21206	0.0241853	0.115368	41.0969	1.61645
GO:0043269	regulation of ion transport	1	258	2	21206	0.0241853	0.115368	41.0969	1.61645
GO:0036324	vascular endothelial growth factor receptor-2 signaling pathway	1	258	2	21206	0.0241853	0.115368	41.0969	1.61645
GO:0015847	putrescine transport	1	258	2	21206	0.0241853	0.115368	41.0969	1.61645
GO:0033032	regulation of myeloid cell apoptotic process	1	258	2	21206	0.0241853	0.115368	41.0969	1.61645
GO:2000342	negative regulation of chemokine (C-X-C motif) ligand 2 production	1	258	2	21206	0.0241853	0.115368	41.0969	1.61645
GO:0071506	cellular response to mycophenolic acid	1	258	2	21206	0.0241853	0.115368	41.0969	1.61645
GO:0010719	negative regulation of epithelial to mesenchymal transition	2	258	20	21206	0.0242531	0.115368	8.21938	1.61523
GO:0033137	negative regulation of peptidyl-serine phosphorylation	2	258	20	21206	0.0242531	0.115368	8.21938	1.61523
GO:0001701	in utero embryonic development	8	258	286	21206	0.0242707	0.115368	2.29913	1.61492
GO:0045944	positive regulation of transcription from RNA polymerase II promoter	19	258	953	21206	0.0243575	0.115368	1.6387	1.61337
GO:0042060	wound healing	4	258	92	21206	0.0260083	0.120732	3.57364	1.58489
GO:0090090	negative regulation of canonical Wnt signaling pathway	4	258	92	21206	0.0260083	0.120732	3.57364	1.58489
GO:0051899	membrane depolarization	2	258	21	21206	0.0265942	0.120732	7.82798	1.57521
GO:0086091	regulation of heart rate by cardiac conduction	2	258	21	21206	0.0265942	0.120732	7.82798	1.57521
GO:0035924	cellular response to vascular endothelial growth factor stimulus	2	258	21	21206	0.0265942	0.120732	7.82798	1.57521
GO:2000463	positive regulation of excitatory postsynaptic membrane potential	2	258	21	21206	0.0265942	0.120732	7.82798	1.57521
GO:0072661	protein targeting to plasma membrane	2	258	21	21206	0.0265942	0.120732	7.82798	1.57521
GO:0051968	positive regulation of synaptic transmission, glutamatergic	2	258	21	21206	0.0265942	0.120732	7.82798	1.57521
GO:0051966	regulation of synaptic transmission, glutamatergic	2	258	21	21206	0.0265942	0.120732	7.82798	1.57521
GO:0045921	positive regulation of exocytosis	2	258	21	21206	0.0265942	0.120732	7.82798	1.57521
GO:0042149	cellular response to glucose starvation	2	258	21	21206	0.0265942	0.120732	7.82798	1.57521
GO:0000132	establishment of mitotic spindle orientation	2	258	21	21206	0.0265942	0.120732	7.82798	1.57521
GO:0043065	positive regulation of apoptotic process	8	258	292	21206	0.0270191	0.122238	2.25188	1.56833
GO:0045892	negative regulation of transcription, DNA-templated	12	258	527	21206	0.0284527	0.128282	1.87159	1.54588
GO:0007409	axonogenesis	4	258	95	21206	0.0288191	0.129077	3.46079	1.54032
GO:0048675	axon extension	2	258	22	21206	0.0290226	0.129077	7.47216	1.53726
GO:0035050	embryonic heart tube development	2	258	22	21206	0.0290226	0.129077	7.47216	1.53726
GO:0016079	synaptic vesicle exocytosis	2	258	22	21206	0.0290226	0.129077	7.47216	1.53726
GO:0043525	positive regulation of neuron apoptotic process	3	258	55	21206	0.0293653	0.13016	4.4833	1.53217
GO:0050821	protein stabilization	4	258	96	21206	0.0297946	0.131618	3.42474	1.52586
GO:0007156	homophilic cell adhesion via plasma membrane adhesion molecules	5	258	142	21206	0.0299939	0.131779	2.89415	1.52297
GO:0021987	cerebral cortex development	3	258	56	21206	0.0307564	0.131779	4.40324	1.51206
GO:0045666	positive regulation of neuron differentiation	4	258	97	21206	0.0307894	0.131779	3.38943	1.5116
GO:0048872	homeostasis of number of cells	2	258	23	21206	0.0315359	0.131779	7.14729	1.50119
GO:1900026	positive regulation of substrate adhesion-dependent cell spreading	2	258	23	21206	0.0315359	0.131779	7.14729	1.50119
GO:0009880	embryonic pattern specification	2	258	23	21206	0.0315359	0.131779	7.14729	1.50119
GO:0060425	lung morphogenesis	2	258	23	21206	0.0315359	0.131779	7.14729	1.50119
GO:0051259	protein oligomerization	3	258	57	21206	0.0321816	0.131779	4.32599	1.49239
GO:0043524	negative regulation of neuron apoptotic process	5	258	147	21206	0.0340745	0.131779	2.79571	1.46757
GO:1900135	positive regulation of renin secretion into blood stream	1	258	3	21206	0.0360585	0.131779	27.3979	1.44299
GO:2000599	negative regulation of cyclin catabolic process	1	258	3	21206	0.0360585	0.131779	27.3979	1.44299
GO:0003140	determination of left/right asymmetry in lateral mesoderm	1	258	3	21206	0.0360585	0.131779	27.3979	1.44299
GO:1900108	negative regulation of nodal signaling pathway	1	258	3	21206	0.0360585	0.131779	27.3979	1.44299
GO:0002025	vasodilation by norepinephrine-epinephrine involved in regulation of systemic arterial blood pressure	1	258	3	21206	0.0360585	0.131779	27.3979	1.44299
GO:0051639	actin filament network formation	1	258	3	21206	0.0360585	0.131779	27.3979	1.44299
GO:1990009	retinal cell apoptotic process	1	258	3	21206	0.0360585	0.131779	27.3979	1.44299
GO:1902110	positive regulation of mitochondrial membrane permeability involved in apoptotic process	1	258	3	21206	0.0360585	0.131779	27.3979	1.44299
GO:0061002	negative regulation of dendritic spine morphogenesis	1	258	3	21206	0.0360585	0.131779	27.3979	1.44299
GO:0021869	forebrain ventricular zone progenitor cell division	1	258	3	21206	0.0360585	0.131779	27.3979	1.44299
GO:0060160	negative regulation of dopamine receptor signaling pathway	1	258	3	21206	0.0360585	0.131779	27.3979	1.44299
GO:0048294	negative regulation of isotype switching to IgE isotypes	1	258	3	21206	0.0360585	0.131779	27.3979	1.44299
GO:0090311	regulation of protein deacetylation	1	258	3	21206	0.0360585	0.131779	27.3979	1.44299
GO:0097187	dentinogenesis	1	258	3	21206	0.0360585	0.131779	27.3979	1.44299
GO:0021764	amygdala development	1	258	3	21206	0.0360585	0.131779	27.3979	1.44299
GO:0060931	sinoatrial node cell development	1	258	3	21206	0.0360585	0.131779	27.3979	1.44299
GO:0043553	negative regulation of phosphatidylinositol 3-kinase activity	1	258	3	21206	0.0360585	0.131779	27.3979	1.44299
GO:0001996	positive regulation of heart rate by epinephrine-norepinephrine	1	258	3	21206	0.0360585	0.131779	27.3979	1.44299
GO:0001997	positive regulation of the force of heart contraction by epinephrine-norepinephrine	1	258	3	21206	0.0360585	0.131779	27.3979	1.44299
GO:0032226	positive regulation of synaptic transmission, dopaminergic	1	258	3	21206	0.0360585	0.131779	27.3979	1.44299
GO:0021571	rhombomere 5 development	1	258	3	21206	0.0360585	0.131779	27.3979	1.44299
GO:0071880	adenylate cyclase-activating adrenergic receptor signaling pathway	1	258	3	21206	0.0360585	0.131779	27.3979	1.44299
GO:0032275	luteinizing hormone secretion	1	258	3	21206	0.0360585	0.131779	27.3979	1.44299
GO:0010248	establishment or maintenance of transmembrane electrochemical gradient	1	258	3	21206	0.0360585	0.131779	27.3979	1.44299
GO:0046666	retinal cell programmed cell death	1	258	3	21206	0.0360585	0.131779	27.3979	1.44299
GO:0009299	mRNA transcription	1	258	3	21206	0.0360585	0.131779	27.3979	1.44299
GO:0060748	tertiary branching involved in mammary gland duct morphogenesis	1	258	3	21206	0.0360585	0.131779	27.3979	1.44299
GO:1900747	negative regulation of vascular endothelial growth factor signaling pathway	1	258	3	21206	0.0360585	0.131779	27.3979	1.44299
GO:0071873	response to norepinephrine	1	258	3	21206	0.0360585	0.131779	27.3979	1.44299
GO:0048866	stem cell fate specification	1	258	3	21206	0.0360585	0.131779	27.3979	1.44299
GO:0035284	brain segmentation	1	258	3	21206	0.0360585	0.131779	27.3979	1.44299
GO:0002121	inter-male aggressive behavior	1	258	3	21206	0.0360585	0.131779	27.3979	1.44299
GO:1902445	regulation of mitochondrial membrane permeability involved in programmed necrotic cell death	1	258	3	21206	0.0360585	0.131779	27.3979	1.44299
GO:0048133	male germ-line stem cell asymmetric division	1	258	3	21206	0.0360585	0.131779	27.3979	1.44299
GO:0002576	platelet degranulation	1	258	3	21206	0.0360585	0.131779	27.3979	1.44299
GO:0051303	establishment of chromosome localization	1	258	3	21206	0.0360585	0.131779	27.3979	1.44299
GO:0071332	cellular response to fructose stimulus	1	258	3	21206	0.0360585	0.131779	27.3979	1.44299
GO:0006990	positive regulation of transcription from RNA polymerase II promoter involved in unfolded protein response	1	258	3	21206	0.0360585	0.131779	27.3979	1.44299
GO:0003273	cell migration involved in endocardial cushion formation	1	258	3	21206	0.0360585	0.131779	27.3979	1.44299
GO:0097107	postsynaptic density assembly	1	258	3	21206	0.0360585	0.131779	27.3979	1.44299
GO:0044805	late nucleophagy	1	258	3	21206	0.0360585	0.131779	27.3979	1.44299
GO:0021988	olfactory lobe development	1	258	3	21206	0.0360585	0.131779	27.3979	1.44299
GO:0051586	positive regulation of dopamine uptake involved in synaptic transmission	1	258	3	21206	0.0360585	0.131779	27.3979	1.44299
GO:1902263	apoptotic process involved in embryonic digit morphogenesis	1	258	3	21206	0.0360585	0.131779	27.3979	1.44299
GO:0006591	ornithine metabolic process	1	258	3	21206	0.0360585	0.131779	27.3979	1.44299
GO:0048194	Golgi vesicle budding	1	258	3	21206	0.0360585	0.131779	27.3979	1.44299
GO:0065002	intracellular protein transmembrane transport	1	258	3	21206	0.0360585	0.131779	27.3979	1.44299
GO:0034727	piecemeal microautophagy of nucleus	1	258	3	21206	0.0360585	0.131779	27.3979	1.44299
GO:0071712	ER-associated misfolded protein catabolic process	1	258	3	21206	0.0360585	0.131779	27.3979	1.44299
GO:0097296	activation of cysteine-type endopeptidase activity involved in apoptotic signaling pathway	1	258	3	21206	0.0360585	0.131779	27.3979	1.44299
GO:1901985	positive regulation of protein acetylation	1	258	3	21206	0.0360585	0.131779	27.3979	1.44299
GO:0090274	positive regulation of somatostatin secretion	1	258	3	21206	0.0360585	0.131779	27.3979	1.44299
GO:0010159	specification of organ position	1	258	3	21206	0.0360585	0.131779	27.3979	1.44299
GO:0030334	regulation of cell migration	3	258	60	21206	0.0366609	0.132669	4.10969	1.4358
GO:0002052	positive regulation of neuroblast proliferation	2	258	25	21206	0.0368076	0.132669	6.5755	1.43406
GO:0010508	positive regulation of autophagy	2	258	25	21206	0.0368076	0.132669	6.5755	1.43406
GO:0045746	negative regulation of Notch signaling pathway	2	258	25	21206	0.0368076	0.132669	6.5755	1.43406
GO:0071353	cellular response to interleukin-4	2	258	25	21206	0.0368076	0.132669	6.5755	1.43406
GO:0001782	B cell homeostasis	2	258	26	21206	0.0395614	0.141816	6.3226	1.40273
GO:0090200	positive regulation of release of cytochrome c from mitochondria	2	258	26	21206	0.0395614	0.141816	6.3226	1.40273
GO:0030036	actin cytoskeleton organization	5	258	154	21206	0.0403408	0.144216	2.66863	1.39426
GO:0051017	actin filament bundle assembly	2	258	27	21206	0.0423906	0.147958	6.08843	1.37273
GO:0033574	response to testosterone	2	258	27	21206	0.0423906	0.147958	6.08843	1.37273
GO:0035108	limb morphogenesis	2	258	27	21206	0.0423906	0.147958	6.08843	1.37273
GO:0002931	response to ischemia	2	258	27	21206	0.0423906	0.147958	6.08843	1.37273
GO:0071902	positive regulation of protein serine/threonine kinase activity	2	258	27	21206	0.0423906	0.147958	6.08843	1.37273
GO:0043066	negative regulation of apoptotic process	11	258	502	21206	0.0441381	0.147958	1.80106	1.35519
GO:0007268	synaptic transmission	5	258	158	21206	0.0442156	0.147958	2.60107	1.35442
GO:0051881	regulation of mitochondrial membrane potential	2	258	28	21206	0.0452932	0.147958	5.87099	1.34397
GO:0048169	regulation of long-term neuronal synaptic plasticity	2	258	28	21206	0.0452932	0.147958	5.87099	1.34397
GO:0010033	response to organic substance	4	258	111	21206	0.0467654	0.147958	2.96194	1.33008
GO:0060596	mammary placode formation	1	258	4	21206	0.0477878	0.147958	20.5484	1.32068
GO:0003100	regulation of systemic arterial blood pressure by endothelin	1	258	4	21206	0.0477878	0.147958	20.5484	1.32068
GO:1900164	nodal signaling pathway involved in determination of lateral mesoderm left/right asymmetry	1	258	4	21206	0.0477878	0.147958	20.5484	1.32068
GO:0032914	positive regulation of transforming growth factor beta1 production	1	258	4	21206	0.0477878	0.147958	20.5484	1.32068
GO:0072193	ureter smooth muscle cell differentiation	1	258	4	21206	0.0477878	0.147958	20.5484	1.32068
GO:0030540	female genitalia development	1	258	4	21206	0.0477878	0.147958	20.5484	1.32068
GO:0038026	reelin-mediated signaling pathway	1	258	4	21206	0.0477878	0.147958	20.5484	1.32068
GO:0014051	gamma-aminobutyric acid secretion	1	258	4	21206	0.0477878	0.147958	20.5484	1.32068
GO:0097237	cellular response to toxic substance	1	258	4	21206	0.0477878	0.147958	20.5484	1.32068
GO:0072148	epithelial cell fate commitment	1	258	4	21206	0.0477878	0.147958	20.5484	1.32068
GO:0060155	platelet dense granule organization	1	258	4	21206	0.0477878	0.147958	20.5484	1.32068
GO:0060393	regulation of pathway-restricted SMAD protein phosphorylation	1	258	4	21206	0.0477878	0.147958	20.5484	1.32068
GO:0031670	cellular response to nutrient	1	258	4	21206	0.0477878	0.147958	20.5484	1.32068
GO:0007100	mitotic centrosome separation	1	258	4	21206	0.0477878	0.147958	20.5484	1.32068
GO:0010638	positive regulation of organelle organization	1	258	4	21206	0.0477878	0.147958	20.5484	1.32068
GO:0033504	floor plate development	1	258	4	21206	0.0477878	0.147958	20.5484	1.32068
GO:0032483	regulation of Rab protein signal transduction	1	258	4	21206	0.0477878	0.147958	20.5484	1.32068
GO:0030050	vesicle transport along actin filament	1	258	4	21206	0.0477878	0.147958	20.5484	1.32068
GO:0008366	axon ensheathment	1	258	4	21206	0.0477878	0.147958	20.5484	1.32068
GO:0045988	negative regulation of striated muscle contraction	1	258	4	21206	0.0477878	0.147958	20.5484	1.32068
GO:0033144	negative regulation of intracellular steroid hormone receptor signaling pathway	1	258	4	21206	0.0477878	0.147958	20.5484	1.32068
GO:0022009	central nervous system vasculogenesis	1	258	4	21206	0.0477878	0.147958	20.5484	1.32068
GO:0034465	response to carbon monoxide	1	258	4	21206	0.0477878	0.147958	20.5484	1.32068
GO:0007091	metaphase/anaphase transition of mitotic cell cycle	1	258	4	21206	0.0477878	0.147958	20.5484	1.32068
GO:0032286	central nervous system myelin maintenance	1	258	4	21206	0.0477878	0.147958	20.5484	1.32068
GO:0070317	negative regulation of G0 to G1 transition	1	258	4	21206	0.0477878	0.147958	20.5484	1.32068
GO:1901888	regulation of cell junction assembly	1	258	4	21206	0.0477878	0.147958	20.5484	1.32068
GO:1900744	regulation of p38MAPK cascade	1	258	4	21206	0.0477878	0.147958	20.5484	1.32068
GO:0048858	cell projection morphogenesis	1	258	4	21206	0.0477878	0.147958	20.5484	1.32068
GO:0072218	metanephric ascending thin limb development	1	258	4	21206	0.0477878	0.147958	20.5484	1.32068
GO:0060024	rhythmic synaptic transmission	1	258	4	21206	0.0477878	0.147958	20.5484	1.32068
GO:0055092	sterol homeostasis	1	258	4	21206	0.0477878	0.147958	20.5484	1.32068
GO:0060214	endocardium formation	1	258	4	21206	0.0477878	0.147958	20.5484	1.32068
GO:0048597	post-embryonic camera-type eye morphogenesis	1	258	4	21206	0.0477878	0.147958	20.5484	1.32068
GO:0007412	axon target recognition	1	258	4	21206	0.0477878	0.147958	20.5484	1.32068
GO:0086001	cardiac muscle cell action potential	1	258	4	21206	0.0477878	0.147958	20.5484	1.32068
GO:0031503	protein complex localization	1	258	4	21206	0.0477878	0.147958	20.5484	1.32068
GO:0032864	activation of Cdc42 GTPase activity	1	258	4	21206	0.0477878	0.147958	20.5484	1.32068
GO:0045415	negative regulation of interleukin-8 biosynthetic process	1	258	4	21206	0.0477878	0.147958	20.5484	1.32068
GO:0032354	response to follicle-stimulating hormone	1	258	4	21206	0.0477878	0.147958	20.5484	1.32068
GO:0010310	regulation of hydrogen peroxide metabolic process	1	258	4	21206	0.0477878	0.147958	20.5484	1.32068
GO:2000510	positive regulation of dendritic cell chemotaxis	1	258	4	21206	0.0477878	0.147958	20.5484	1.32068
GO:0033299	secretion of lysosomal enzymes	1	258	4	21206	0.0477878	0.147958	20.5484	1.32068
GO:2000347	positive regulation of hepatocyte proliferation	1	258	4	21206	0.0477878	0.147958	20.5484	1.32068
GO:0071504	cellular response to heparin	1	258	4	21206	0.0477878	0.147958	20.5484	1.32068
GO:0035556	intracellular signal transduction	9	258	387	21206	0.048004	0.147958	1.91148	1.31872
GO:0048678	response to axon injury	2	258	29	21206	0.0482669	0.147958	5.66854	1.31635
GO:0051602	response to electrical stimulus	2	258	29	21206	0.0482669	0.147958	5.66854	1.31635
GO:0008625	extrinsic apoptotic signaling pathway via death domain receptors	2	258	29	21206	0.0482669	0.147958	5.66854	1.31635
GO:0048147	negative regulation of fibroblast proliferation	2	258	29	21206	0.0482669	0.147958	5.66854	1.31635
GO:0007616	long-term memory	2	258	29	21206	0.0482669	0.147958	5.66854	1.31635
GO:0007623	circadian rhythm	4	258	113	21206	0.0493606	0.150958	2.90951	1.30662
GO:0001568	blood vessel development	3	258	68	21206	0.0500707	0.152774	3.6262	1.30042
GO:0001764	neuron migration	4	258	115	21206	0.0520338	0.158395	2.85891	1.28371
GO:0046777	protein autophosphorylation	5	258	167	21206	0.0537242	0.16095	2.46089	1.26983
GO:0031623	receptor internalization	2	258	31	21206	0.0544191	0.16095	5.30283	1.26425
GO:0042177	negative regulation of protein catabolic process	2	258	31	21206	0.0544191	0.16095	5.30283	1.26425
GO:0060612	adipose tissue development	2	258	31	21206	0.0544191	0.16095	5.30283	1.26425
GO:0050679	positive regulation of epithelial cell proliferation	3	258	72	21206	0.0575505	0.16095	3.42474	1.23995
GO:0048008	platelet-derived growth factor receptor signaling pathway	2	258	32	21206	0.0575934	0.16095	5.13711	1.23963
GO:0045909	positive regulation of vasodilation	2	258	32	21206	0.0575934	0.16095	5.13711	1.23963
GO:0008284	positive regulation of cell proliferation	10	258	464	21206	0.0584109	0.16095	1.77142	1.23351
GO:0008360	regulation of cell shape	4	258	120	21206	0.0590557	0.16095	2.73979	1.22874
GO:0035166	post-embryonic hemopoiesis	1	258	5	21206	0.059375	0.16095	16.4388	1.2264
GO:2000369	regulation of clathrin-mediated endocytosis	1	258	5	21206	0.059375	0.16095	16.4388	1.2264
GO:0002043	blood vessel endothelial cell proliferation involved in sprouting angiogenesis	1	258	5	21206	0.059375	0.16095	16.4388	1.2264
GO:0071218	cellular response to misfolded protein	1	258	5	21206	0.059375	0.16095	16.4388	1.2264
GO:1900102	negative regulation of endoplasmic reticulum unfolded protein response	1	258	5	21206	0.059375	0.16095	16.4388	1.2264
GO:0008635	activation of cysteine-type endopeptidase activity involved in apoptotic process by cytochrome c	1	258	5	21206	0.059375	0.16095	16.4388	1.2264
GO:0061051	positive regulation of cell growth involved in cardiac muscle cell development	1	258	5	21206	0.059375	0.16095	16.4388	1.2264
GO:0006670	sphingosine metabolic process	1	258	5	21206	0.059375	0.16095	16.4388	1.2264
GO:0060923	cardiac muscle cell fate commitment	1	258	5	21206	0.059375	0.16095	16.4388	1.2264
GO:0022405	hair cycle process	1	258	5	21206	0.059375	0.16095	16.4388	1.2264
GO:0046878	positive regulation of saliva secretion	1	258	5	21206	0.059375	0.16095	16.4388	1.2264
GO:0016199	axon midline choice point recognition	1	258	5	21206	0.059375	0.16095	16.4388	1.2264
GO:0007007	inner mitochondrial membrane organization	1	258	5	21206	0.059375	0.16095	16.4388	1.2264
GO:0001757	somite specification	1	258	5	21206	0.059375	0.16095	16.4388	1.2264
GO:0086011	membrane repolarization during action potential	1	258	5	21206	0.059375	0.16095	16.4388	1.2264
GO:0086012	membrane depolarization during cardiac muscle cell action potential	1	258	5	21206	0.059375	0.16095	16.4388	1.2264
GO:0097151	positive regulation of inhibitory postsynaptic membrane potential	1	258	5	21206	0.059375	0.16095	16.4388	1.2264
GO:0043567	regulation of insulin-like growth factor receptor signaling pathway	1	258	5	21206	0.059375	0.16095	16.4388	1.2264
GO:0060761	negative regulation of response to cytokine stimulus	1	258	5	21206	0.059375	0.16095	16.4388	1.2264
GO:0033136	serine phosphorylation of STAT3 protein	1	258	5	21206	0.059375	0.16095	16.4388	1.2264
GO:0090394	negative regulation of excitatory postsynaptic membrane potential	1	258	5	21206	0.059375	0.16095	16.4388	1.2264
GO:0033599	regulation of mammary gland epithelial cell proliferation	1	258	5	21206	0.059375	0.16095	16.4388	1.2264
GO:0048671	negative regulation of collateral sprouting	1	258	5	21206	0.059375	0.16095	16.4388	1.2264
GO:0046661	male sex differentiation	1	258	5	21206	0.059375	0.16095	16.4388	1.2264
GO:0048845	venous blood vessel morphogenesis	1	258	5	21206	0.059375	0.16095	16.4388	1.2264
GO:0060956	endocardial cell differentiation	1	258	5	21206	0.059375	0.16095	16.4388	1.2264
GO:0046684	response to pyrethroid	1	258	5	21206	0.059375	0.16095	16.4388	1.2264
GO:0015672	monovalent inorganic cation transport	1	258	5	21206	0.059375	0.16095	16.4388	1.2264
GO:1900273	positive regulation of long-term synaptic potentiation	1	258	5	21206	0.059375	0.16095	16.4388	1.2264
GO:0071394	cellular response to testosterone stimulus	1	258	5	21206	0.059375	0.16095	16.4388	1.2264
GO:0051546	keratinocyte migration	1	258	5	21206	0.059375	0.16095	16.4388	1.2264
GO:0006527	arginine catabolic process	1	258	5	21206	0.059375	0.16095	16.4388	1.2264
GO:0006987	activation of signaling protein activity involved in unfolded protein response	1	258	5	21206	0.059375	0.16095	16.4388	1.2264
GO:0051387	negative regulation of neurotrophin TRK receptor signaling pathway	1	258	5	21206	0.059375	0.16095	16.4388	1.2264
GO:0003283	atrial septum development	1	258	5	21206	0.059375	0.16095	16.4388	1.2264
GO:1902004	positive regulation of beta-amyloid formation	1	258	5	21206	0.059375	0.16095	16.4388	1.2264
GO:0060058	positive regulation of apoptotic process involved in mammary gland involution	1	258	5	21206	0.059375	0.16095	16.4388	1.2264
GO:0001821	histamine secretion	1	258	5	21206	0.059375	0.16095	16.4388	1.2264
GO:0002904	positive regulation of B cell apoptotic process	1	258	5	21206	0.059375	0.16095	16.4388	1.2264
GO:0045629	negative regulation of T-helper 2 cell differentiation	1	258	5	21206	0.059375	0.16095	16.4388	1.2264
GO:0031077	post-embryonic camera-type eye development	1	258	5	21206	0.059375	0.16095	16.4388	1.2264
GO:0031062	positive regulation of histone methylation	1	258	5	21206	0.059375	0.16095	16.4388	1.2264
GO:0060666	dichotomous subdivision of terminal units involved in salivary gland branching	1	258	5	21206	0.059375	0.16095	16.4388	1.2264
GO:0060836	lymphatic endothelial cell differentiation	1	258	5	21206	0.059375	0.16095	16.4388	1.2264
GO:0035023	regulation of Rho protein signal transduction	3	258	73	21206	0.0594986	0.160953	3.37783	1.22549
GO:0009409	response to cold	2	258	33	21206	0.0608305	0.163544	4.98144	1.21588
GO:0042220	response to cocaine	2	258	33	21206	0.0608305	0.163544	4.98144	1.21588
GO:0035116	embryonic hindlimb morphogenesis	2	258	33	21206	0.0608305	0.163544	4.98144	1.21588
GO:0006457	protein folding	4	258	123	21206	0.0634993	0.17037	2.67297	1.19723
GO:0050796	regulation of insulin secretion	2	258	34	21206	0.0641284	0.171009	4.83493	1.19295
GO:0030879	mammary gland development	2	258	34	21206	0.0641284	0.171009	4.83493	1.19295
GO:0032320	positive regulation of Ras GTPase activity	2	258	34	21206	0.0641284	0.171009	4.83493	1.19295
GO:0043086	negative regulation of catalytic activity	3	258	76	21206	0.0655259	0.172578	3.24449	1.18359
GO:0007267	cell-cell signaling	3	258	77	21206	0.0675951	0.172578	3.20236	1.17008
GO:0060385	axonogenesis involved in innervation	1	258	6	21206	0.0708217	0.172578	13.699	1.14983
GO:2001224	positive regulation of neuron migration	1	258	6	21206	0.0708217	0.172578	13.699	1.14983
GO:0051247	positive regulation of protein metabolic process	1	258	6	21206	0.0708217	0.172578	13.699	1.14983
GO:0032966	negative regulation of collagen biosynthetic process	1	258	6	21206	0.0708217	0.172578	13.699	1.14983
GO:2001046	positive regulation of integrin-mediated signaling pathway	1	258	6	21206	0.0708217	0.172578	13.699	1.14983
GO:0021853	cerebral cortex GABAergic interneuron migration	1	258	6	21206	0.0708217	0.172578	13.699	1.14983
GO:0060179	male mating behavior	1	258	6	21206	0.0708217	0.172578	13.699	1.14983
GO:0021797	forebrain anterior/posterior pattern specification	1	258	6	21206	0.0708217	0.172578	13.699	1.14983
GO:0008595	anterior/posterior axis specification, embryo	1	258	6	21206	0.0708217	0.172578	13.699	1.14983
GO:0090344	negative regulation of cell aging	1	258	6	21206	0.0708217	0.172578	13.699	1.14983
GO:0030252	growth hormone secretion	1	258	6	21206	0.0708217	0.172578	13.699	1.14983
GO:0090315	negative regulation of protein targeting to membrane	1	258	6	21206	0.0708217	0.172578	13.699	1.14983
GO:0042699	follicle-stimulating hormone signaling pathway	1	258	6	21206	0.0708217	0.172578	13.699	1.14983
GO:0032233	positive regulation of actin filament bundle assembly	1	258	6	21206	0.0708217	0.172578	13.699	1.14983
GO:0086013	membrane repolarization during cardiac muscle cell action potential	1	258	6	21206	0.0708217	0.172578	13.699	1.14983
GO:0046834	lipid phosphorylation	1	258	6	21206	0.0708217	0.172578	13.699	1.14983
GO:0002829	negative regulation of type 2 immune response	1	258	6	21206	0.0708217	0.172578	13.699	1.14983
GO:0035356	cellular triglyceride homeostasis	1	258	6	21206	0.0708217	0.172578	13.699	1.14983
GO:2000001	regulation of DNA damage checkpoint	1	258	6	21206	0.0708217	0.172578	13.699	1.14983
GO:0060449	bud elongation involved in lung branching	1	258	6	21206	0.0708217	0.172578	13.699	1.14983
GO:0070242	thymocyte apoptotic process	1	258	6	21206	0.0708217	0.172578	13.699	1.14983
GO:0050881	musculoskeletal movement	1	258	6	21206	0.0708217	0.172578	13.699	1.14983
GO:0090080	positive regulation of MAPKKK cascade by fibroblast growth factor receptor signaling pathway	1	258	6	21206	0.0708217	0.172578	13.699	1.14983
GO:0051138	positive regulation of NK T cell differentiation	1	258	6	21206	0.0708217	0.172578	13.699	1.14983
GO:0072091	regulation of stem cell proliferation	1	258	6	21206	0.0708217	0.172578	13.699	1.14983
GO:0051152	positive regulation of smooth muscle cell differentiation	1	258	6	21206	0.0708217	0.172578	13.699	1.14983
GO:0051346	negative regulation of hydrolase activity	1	258	6	21206	0.0708217	0.172578	13.699	1.14983
GO:1902262	apoptotic process involved in patterning of blood vessels	1	258	6	21206	0.0708217	0.172578	13.699	1.14983
GO:1903599	positive regulation of mitochondrion degradation	1	258	6	21206	0.0708217	0.172578	13.699	1.14983
GO:0007379	segment specification	1	258	6	21206	0.0708217	0.172578	13.699	1.14983
GO:0030388	fructose 1,6-bisphosphate metabolic process	1	258	6	21206	0.0708217	0.172578	13.699	1.14983
GO:0016081	synaptic vesicle docking	1	258	6	21206	0.0708217	0.172578	13.699	1.14983
GO:0010518	positive regulation of phospholipase activity	1	258	6	21206	0.0708217	0.172578	13.699	1.14983
GO:0035811	negative regulation of urine volume	1	258	6	21206	0.0708217	0.172578	13.699	1.14983
GO:0032534	regulation of microvillus assembly	1	258	6	21206	0.0708217	0.172578	13.699	1.14983
GO:0010594	regulation of endothelial cell migration	1	258	6	21206	0.0708217	0.172578	13.699	1.14983
GO:0050847	progesterone receptor signaling pathway	1	258	6	21206	0.0708217	0.172578	13.699	1.14983
GO:0071559	response to transforming growth factor beta	1	258	6	21206	0.0708217	0.172578	13.699	1.14983
GO:0001661	conditioned taste aversion	1	258	6	21206	0.0708217	0.172578	13.699	1.14983
GO:2000323	negative regulation of glucocorticoid receptor signaling pathway	1	258	6	21206	0.0708217	0.172578	13.699	1.14983
GO:0044387	negative regulation of protein kinase activity by regulation of protein phosphorylation	1	258	6	21206	0.0708217	0.172578	13.699	1.14983
GO:0048505	regulation of timing of cell differentiation	1	258	6	21206	0.0708217	0.172578	13.699	1.14983
GO:0006605	protein targeting	2	258	36	21206	0.0708989	0.172578	4.56632	1.14936
GO:0048565	digestive tract development	2	258	36	21206	0.0708989	0.172578	4.56632	1.14936
GO:0055007	cardiac muscle cell differentiation	2	258	36	21206	0.0708989	0.172578	4.56632	1.14936
GO:0051216	cartilage development	3	258	80	21206	0.0739786	0.179741	3.08227	1.13089
GO:0007528	neuromuscular junction development	2	258	37	21206	0.0743676	0.180019	4.44291	1.12862
GO:0070527	platelet aggregation	2	258	37	21206	0.0743676	0.180019	4.44291	1.12862
GO:0010468	regulation of gene expression	6	258	241	21206	0.0748717	0.180905	2.04632	1.12568
GO:2001235	positive regulation of apoptotic signaling pathway	2	258	38	21206	0.0778896	0.185144	4.32599	1.10852
GO:0043407	negative regulation of MAP kinase activity	2	258	38	21206	0.0778896	0.185144	4.32599	1.10852
GO:0010243	response to organonitrogen compound	2	258	38	21206	0.0778896	0.185144	4.32599	1.10852
GO:0033077	T cell differentiation in thymus	2	258	38	21206	0.0778896	0.185144	4.32599	1.10852
GO:0007189	adenylate cyclase-activating G-protein coupled receptor signaling pathway	2	258	38	21206	0.0778896	0.185144	4.32599	1.10852
GO:0048247	lymphocyte chemotaxis	1	258	7	21206	0.0821296	0.185144	11.742	1.0855
GO:0035148	tube formation	1	258	7	21206	0.0821296	0.185144	11.742	1.0855
GO:1902108	regulation of mitochondrial membrane permeability involved in apoptotic process	1	258	7	21206	0.0821296	0.185144	11.742	1.0855
GO:0002467	germinal center formation	1	258	7	21206	0.0821296	0.185144	11.742	1.0855
GO:0048679	regulation of axon regeneration	1	258	7	21206	0.0821296	0.185144	11.742	1.0855
GO:0048680	positive regulation of axon regeneration	1	258	7	21206	0.0821296	0.185144	11.742	1.0855
GO:0071455	cellular response to hyperoxia	1	258	7	21206	0.0821296	0.185144	11.742	1.0855
GO:0002029	desensitization of G-protein coupled receptor protein signaling pathway	1	258	7	21206	0.0821296	0.185144	11.742	1.0855
GO:0006013	mannose metabolic process	1	258	7	21206	0.0821296	0.185144	11.742	1.0855
GO:0031642	negative regulation of myelination	1	258	7	21206	0.0821296	0.185144	11.742	1.0855
GO:0016188	synaptic vesicle maturation	1	258	7	21206	0.0821296	0.185144	11.742	1.0855
GO:0055119	relaxation of cardiac muscle	1	258	7	21206	0.0821296	0.185144	11.742	1.0855
GO:0033572	transferrin transport	1	258	7	21206	0.0821296	0.185144	11.742	1.0855
GO:0035360	positive regulation of peroxisome proliferator activated receptor signaling pathway	1	258	7	21206	0.0821296	0.185144	11.742	1.0855
GO:0051764	actin crosslink formation	1	258	7	21206	0.0821296	0.185144	11.742	1.0855
GO:1900025	negative regulation of substrate adhesion-dependent cell spreading	1	258	7	21206	0.0821296	0.185144	11.742	1.0855
GO:0006975	DNA damage induced protein phosphorylation	1	258	7	21206	0.0821296	0.185144	11.742	1.0855
GO:0060011	Sertoli cell proliferation	1	258	7	21206	0.0821296	0.185144	11.742	1.0855
GO:0006516	glycoprotein catabolic process	1	258	7	21206	0.0821296	0.185144	11.742	1.0855
GO:0072089	stem cell proliferation	1	258	7	21206	0.0821296	0.185144	11.742	1.0855
GO:0061371	determination of heart left/right asymmetry	1	258	7	21206	0.0821296	0.185144	11.742	1.0855
GO:0009629	response to gravity	1	258	7	21206	0.0821296	0.185144	11.742	1.0855
GO:0060055	angiogenesis involved in wound healing	1	258	7	21206	0.0821296	0.185144	11.742	1.0855
GO:0006029	proteoglycan metabolic process	1	258	7	21206	0.0821296	0.185144	11.742	1.0855
GO:0043497	regulation of protein heterodimerization activity	1	258	7	21206	0.0821296	0.185144	11.742	1.0855
GO:0043496	regulation of protein homodimerization activity	1	258	7	21206	0.0821296	0.185144	11.742	1.0855
GO:0008064	regulation of actin polymerization or depolymerization	1	258	7	21206	0.0821296	0.185144	11.742	1.0855
GO:2000778	positive regulation of interleukin-6 secretion	1	258	7	21206	0.0821296	0.185144	11.742	1.0855
GO:0050807	regulation of synapse organization	1	258	7	21206	0.0821296	0.185144	11.742	1.0855
GO:0034144	negative regulation of toll-like receptor 4 signaling pathway	1	258	7	21206	0.0821296	0.185144	11.742	1.0855
GO:0006927	transformed cell apoptotic process	1	258	7	21206	0.0821296	0.185144	11.742	1.0855
GO:0048732	gland development	1	258	7	21206	0.0821296	0.185144	11.742	1.0855
GO:0046324	regulation of glucose import	1	258	7	21206	0.0821296	0.185144	11.742	1.0855
GO:0008090	retrograde axon cargo transport	1	258	7	21206	0.0821296	0.185144	11.742	1.0855
GO:0048813	dendrite morphogenesis	2	258	40	21206	0.0850863	0.190176	4.10969	1.07014
GO:0001974	blood vessel remodeling	2	258	40	21206	0.0850863	0.190176	4.10969	1.07014
GO:0030433	ER-associated ubiquitin-dependent protein catabolic process	2	258	40	21206	0.0850863	0.190176	4.10969	1.07014
GO:0032855	positive regulation of Rac GTPase activity	2	258	40	21206	0.0850863	0.190176	4.10969	1.07014
GO:0048545	response to steroid hormone	2	258	40	21206	0.0850863	0.190176	4.10969	1.07014
GO:0060070	canonical Wnt signaling pathway	3	258	86	21206	0.087509	0.191266	2.86723	1.05795
GO:0097190	apoptotic signaling pathway	2	258	41	21206	0.0887574	0.191266	4.00945	1.0518
GO:0001569	patterning of blood vessels	2	258	41	21206	0.0887574	0.191266	4.00945	1.0518
GO:0042127	regulation of cell proliferation	5	258	196	21206	0.091783	0.191266	2.09678	1.03724
GO:0060048	cardiac muscle contraction	2	258	42	21206	0.0924747	0.191266	3.91399	1.03398
GO:0030705	cytoskeleton-dependent intracellular transport	1	258	8	21206	0.0933004	0.191266	10.2742	1.03012
GO:0060371	regulation of atrial cardiac muscle cell membrane depolarization	1	258	8	21206	0.0933004	0.191266	10.2742	1.03012
GO:0005980	glycogen catabolic process	1	258	8	21206	0.0933004	0.191266	10.2742	1.03012
GO:0000288	nuclear-transcribed mRNA catabolic process, deadenylation-dependent decay	1	258	8	21206	0.0933004	0.191266	10.2742	1.03012
GO:0050774	negative regulation of dendrite morphogenesis	1	258	8	21206	0.0933004	0.191266	10.2742	1.03012
GO:0006687	glycosphingolipid metabolic process	1	258	8	21206	0.0933004	0.191266	10.2742	1.03012
GO:0010941	regulation of cell death	1	258	8	21206	0.0933004	0.191266	10.2742	1.03012
GO:0051444	negative regulation of ubiquitin-protein transferase activity	1	258	8	21206	0.0933004	0.191266	10.2742	1.03012
GO:0071294	cellular response to zinc ion	1	258	8	21206	0.0933004	0.191266	10.2742	1.03012
GO:0042754	negative regulation of circadian rhythm	1	258	8	21206	0.0933004	0.191266	10.2742	1.03012
GO:0045762	positive regulation of adenylate cyclase activity	1	258	8	21206	0.0933004	0.191266	10.2742	1.03012
GO:0001956	positive regulation of neurotransmitter secretion	1	258	8	21206	0.0933004	0.191266	10.2742	1.03012
GO:0031102	neuron projection regeneration	1	258	8	21206	0.0933004	0.191266	10.2742	1.03012
GO:0019227	neuronal action potential propagation	1	258	8	21206	0.0933004	0.191266	10.2742	1.03012
GO:0032418	lysosome localization	1	258	8	21206	0.0933004	0.191266	10.2742	1.03012
GO:0007270	neuron-neuron synaptic transmission	1	258	8	21206	0.0933004	0.191266	10.2742	1.03012
GO:0032471	negative regulation of endoplasmic reticulum calcium ion concentration	1	258	8	21206	0.0933004	0.191266	10.2742	1.03012
GO:0045986	negative regulation of smooth muscle contraction	1	258	8	21206	0.0933004	0.191266	10.2742	1.03012
GO:0060907	positive regulation of macrophage cytokine production	1	258	8	21206	0.0933004	0.191266	10.2742	1.03012
GO:0032229	negative regulation of synaptic transmission, GABAergic	1	258	8	21206	0.0933004	0.191266	10.2742	1.03012
GO:0001776	leukocyte homeostasis	1	258	8	21206	0.0933004	0.191266	10.2742	1.03012
GO:0045348	positive regulation of MHC class II biosynthetic process	1	258	8	21206	0.0933004	0.191266	10.2742	1.03012
GO:0070307	lens fiber cell development	1	258	8	21206	0.0933004	0.191266	10.2742	1.03012
GO:0001101	response to acid chemical	1	258	8	21206	0.0933004	0.191266	10.2742	1.03012
GO:2000480	negative regulation of cAMP-dependent protein kinase activity	1	258	8	21206	0.0933004	0.191266	10.2742	1.03012
GO:0071372	cellular response to follicle-stimulating hormone stimulus	1	258	8	21206	0.0933004	0.191266	10.2742	1.03012
GO:1900029	positive regulation of ruffle assembly	1	258	8	21206	0.0933004	0.191266	10.2742	1.03012
GO:0006972	hyperosmotic response	1	258	8	21206	0.0933004	0.191266	10.2742	1.03012
GO:0050687	negative regulation of defense response to virus	1	258	8	21206	0.0933004	0.191266	10.2742	1.03012
GO:0000160	phosphorelay signal transduction system	1	258	8	21206	0.0933004	0.191266	10.2742	1.03012
GO:0006707	cholesterol catabolic process	1	258	8	21206	0.0933004	0.191266	10.2742	1.03012
GO:0030850	prostate gland development	1	258	8	21206	0.0933004	0.191266	10.2742	1.03012
GO:0097105	presynaptic membrane assembly	1	258	8	21206	0.0933004	0.191266	10.2742	1.03012
GO:0040020	regulation of meiosis	1	258	8	21206	0.0933004	0.191266	10.2742	1.03012
GO:0007217	tachykinin receptor signaling pathway	1	258	8	21206	0.0933004	0.191266	10.2742	1.03012
GO:0045647	negative regulation of erythrocyte differentiation	1	258	8	21206	0.0933004	0.191266	10.2742	1.03012
GO:0010591	regulation of lamellipodium assembly	1	258	8	21206	0.0933004	0.191266	10.2742	1.03012
GO:0001881	receptor recycling	1	258	8	21206	0.0933004	0.191266	10.2742	1.03012
GO:0042118	endothelial cell activation	1	258	8	21206	0.0933004	0.191266	10.2742	1.03012
GO:0042596	fear response	1	258	8	21206	0.0933004	0.191266	10.2742	1.03012
GO:2000737	negative regulation of stem cell differentiation	1	258	8	21206	0.0933004	0.191266	10.2742	1.03012
GO:0090051	negative regulation of cell migration involved in sprouting angiogenesis	1	258	8	21206	0.0933004	0.191266	10.2742	1.03012
GO:0043089	positive regulation of Cdc42 GTPase activity	1	258	8	21206	0.0933004	0.191266	10.2742	1.03012
GO:0071316	cellular response to nicotine	1	258	8	21206	0.0933004	0.191266	10.2742	1.03012
GO:0045446	endothelial cell differentiation	1	258	8	21206	0.0933004	0.191266	10.2742	1.03012
GO:0048729	tissue morphogenesis	1	258	8	21206	0.0933004	0.191266	10.2742	1.03012
GO:0001696	gastric acid secretion	1	258	8	21206	0.0933004	0.191266	10.2742	1.03012
GO:0034115	negative regulation of heterotypic cell-cell adhesion	1	258	8	21206	0.0933004	0.191266	10.2742	1.03012
GO:0051726	regulation of cell cycle	4	258	142	21206	0.0955138	0.195498	2.31532	1.01993
GO:0032091	negative regulation of protein binding	2	258	43	21206	0.0962367	0.196671	3.82297	1.01666
GO:0043410	positive regulation of MAPK cascade	3	258	91	21206	0.0995187	0.200423	2.70969	1.0021
GO:0000910	cytokinesis	2	258	44	21206	0.100042	0.200423	3.73608	0.999819
GO:0007507	heart development	5	258	203	21206	0.102617	0.200423	2.02448	0.988782
GO:0030948	negative regulation of vascular endothelial growth factor receptor signaling pathway	1	258	9	21206	0.104336	0.200423	9.13264	0.981566
GO:0060113	inner ear receptor cell differentiation	1	258	9	21206	0.104336	0.200423	9.13264	0.981566
GO:0034067	protein localization to Golgi apparatus	1	258	9	21206	0.104336	0.200423	9.13264	0.981566
GO:0009913	epidermal cell differentiation	1	258	9	21206	0.104336	0.200423	9.13264	0.981566
GO:0051489	regulation of filopodium assembly	1	258	9	21206	0.104336	0.200423	9.13264	0.981566
GO:0051001	negative regulation of nitric-oxide synthase activity	1	258	9	21206	0.104336	0.200423	9.13264	0.981566
GO:0045823	positive regulation of heart contraction	1	258	9	21206	0.104336	0.200423	9.13264	0.981566
GO:0016043	cellular component organization	1	258	9	21206	0.104336	0.200423	9.13264	0.981566
GO:0033603	positive regulation of dopamine secretion	1	258	9	21206	0.104336	0.200423	9.13264	0.981566
GO:0042511	positive regulation of tyrosine phosphorylation of Stat1 protein	1	258	9	21206	0.104336	0.200423	9.13264	0.981566
GO:0043551	regulation of phosphatidylinositol 3-kinase activity	1	258	9	21206	0.104336	0.200423	9.13264	0.981566
GO:0034405	response to fluid shear stress	1	258	9	21206	0.104336	0.200423	9.13264	0.981566
GO:0060996	dendritic spine development	1	258	9	21206	0.104336	0.200423	9.13264	0.981566
GO:0060997	dendritic spine morphogenesis	1	258	9	21206	0.104336	0.200423	9.13264	0.981566
GO:0060541	respiratory system development	1	258	9	21206	0.104336	0.200423	9.13264	0.981566
GO:0001771	immunological synapse formation	1	258	9	21206	0.104336	0.200423	9.13264	0.981566
GO:0048667	cell morphogenesis involved in neuron differentiation	1	258	9	21206	0.104336	0.200423	9.13264	0.981566
GO:0090141	positive regulation of mitochondrial fission	1	258	9	21206	0.104336	0.200423	9.13264	0.981566
GO:0090129	positive regulation of synapse maturation	1	258	9	21206	0.104336	0.200423	9.13264	0.981566
GO:0060736	prostate gland growth	1	258	9	21206	0.104336	0.200423	9.13264	0.981566
GO:0061337	cardiac conduction	1	258	9	21206	0.104336	0.200423	9.13264	0.981566
GO:0000185	activation of MAPKKK activity	1	258	9	21206	0.104336	0.200423	9.13264	0.981566
GO:0006983	ER overload response	1	258	9	21206	0.104336	0.200423	9.13264	0.981566
GO:0070257	positive regulation of mucus secretion	1	258	9	21206	0.104336	0.200423	9.13264	0.981566
GO:0040019	positive regulation of embryonic development	1	258	9	21206	0.104336	0.200423	9.13264	0.981566
GO:0032816	positive regulation of natural killer cell activation	1	258	9	21206	0.104336	0.200423	9.13264	0.981566
GO:0031960	response to corticosteroid	1	258	9	21206	0.104336	0.200423	9.13264	0.981566
GO:1901381	positive regulation of potassium ion transmembrane transport	1	258	9	21206	0.104336	0.200423	9.13264	0.981566
GO:0038180	nerve growth factor signaling pathway	1	258	9	21206	0.104336	0.200423	9.13264	0.981566
GO:0045906	negative regulation of vasoconstriction	1	258	9	21206	0.104336	0.200423	9.13264	0.981566
GO:0032319	regulation of Rho GTPase activity	1	258	9	21206	0.104336	0.200423	9.13264	0.981566
GO:0017158	regulation of calcium ion-dependent exocytosis	1	258	9	21206	0.104336	0.200423	9.13264	0.981566
GO:0031284	positive regulation of guanylate cyclase activity	1	258	9	21206	0.104336	0.200423	9.13264	0.981566
GO:0061099	negative regulation of protein tyrosine kinase activity	1	258	9	21206	0.104336	0.200423	9.13264	0.981566
GO:0031017	exocrine pancreas development	1	258	9	21206	0.104336	0.200423	9.13264	0.981566
GO:0000578	embryonic axis specification	1	258	9	21206	0.104336	0.200423	9.13264	0.981566
GO:2000773	negative regulation of cellular senescence	1	258	9	21206	0.104336	0.200423	9.13264	0.981566
GO:0035234	ectopic germ cell programmed cell death	1	258	9	21206	0.104336	0.200423	9.13264	0.981566
GO:0001558	regulation of cell growth	2	258	46	21206	0.107774	0.206122	3.57364	0.967485
GO:0035019	somatic stem cell maintenance	2	258	46	21206	0.107774	0.206122	3.57364	0.967485
GO:0034599	cellular response to oxidative stress	2	258	46	21206	0.107774	0.206122	3.57364	0.967485
GO:0010976	positive regulation of neuron projection development	3	258	95	21206	0.109576	0.209262	2.59559	0.960286
GO:0003151	outflow tract morphogenesis	2	258	47	21206	0.111699	0.210867	3.49761	0.951952
GO:0050765	negative regulation of phagocytosis	1	258	10	21206	0.115237	0.210867	8.21938	0.938406
GO:0002262	myeloid cell homeostasis	1	258	10	21206	0.115237	0.210867	8.21938	0.938406
GO:0002024	diet induced thermogenesis	1	258	10	21206	0.115237	0.210867	8.21938	0.938406
GO:0045806	negative regulation of endocytosis	1	258	10	21206	0.115237	0.210867	8.21938	0.938406
GO:0051024	positive regulation of immunoglobulin secretion	1	258	10	21206	0.115237	0.210867	8.21938	0.938406
GO:0045839	negative regulation of mitosis	1	258	10	21206	0.115237	0.210867	8.21938	0.938406
GO:0043653	mitochondrial fragmentation involved in apoptotic process	1	258	10	21206	0.115237	0.210867	8.21938	0.938406
GO:0061001	regulation of dendritic spine morphogenesis	1	258	10	21206	0.115237	0.210867	8.21938	0.938406
GO:0031669	cellular response to nutrient levels	1	258	10	21206	0.115237	0.210867	8.21938	0.938406
GO:0032434	regulation of proteasomal ubiquitin-dependent protein catabolic process	1	258	10	21206	0.115237	0.210867	8.21938	0.938406
GO:0045792	negative regulation of cell size	1	258	10	21206	0.115237	0.210867	8.21938	0.938406
GO:0032486	Rap protein signal transduction	1	258	10	21206	0.115237	0.210867	8.21938	0.938406
GO:0010226	response to lithium ion	1	258	10	21206	0.115237	0.210867	8.21938	0.938406
GO:0022010	central nervous system myelination	1	258	10	21206	0.115237	0.210867	8.21938	0.938406
GO:0001763	morphogenesis of a branching structure	1	258	10	21206	0.115237	0.210867	8.21938	0.938406
GO:0006809	nitric oxide biosynthetic process	1	258	10	21206	0.115237	0.210867	8.21938	0.938406
GO:0035584	calcium-mediated signaling using intracellular calcium source	1	258	10	21206	0.115237	0.210867	8.21938	0.938406
GO:0034497	protein localization to pre-autophagosomal structure	1	258	10	21206	0.115237	0.210867	8.21938	0.938406
GO:0071875	adrenergic receptor signaling pathway	1	258	10	21206	0.115237	0.210867	8.21938	0.938406
GO:0031953	negative regulation of protein autophosphorylation	1	258	10	21206	0.115237	0.210867	8.21938	0.938406
GO:0040011	locomotion	1	258	10	21206	0.115237	0.210867	8.21938	0.938406
GO:0043534	blood vessel endothelial cell migration	1	258	10	21206	0.115237	0.210867	8.21938	0.938406
GO:0006590	thyroid hormone generation	1	258	10	21206	0.115237	0.210867	8.21938	0.938406
GO:0030431	sleep	1	258	10	21206	0.115237	0.210867	8.21938	0.938406
GO:0048708	astrocyte differentiation	1	258	10	21206	0.115237	0.210867	8.21938	0.938406
GO:0060402	calcium ion transport into cytosol	1	258	10	21206	0.115237	0.210867	8.21938	0.938406
GO:0051926	negative regulation of calcium ion transport	1	258	10	21206	0.115237	0.210867	8.21938	0.938406
GO:0031065	positive regulation of histone deacetylation	1	258	10	21206	0.115237	0.210867	8.21938	0.938406
GO:0035646	endosome to melanosome transport	1	258	10	21206	0.115237	0.210867	8.21938	0.938406
GO:0001657	ureteric bud development	2	258	48	21206	0.11566	0.211345	3.42474	0.936817
GO:0007010	cytoskeleton organization	3	258	98	21206	0.117365	0.214163	2.51614	0.930461
GO:0032321	positive regulation of Rho GTPase activity	3	258	99	21206	0.120007	0.218679	2.49072	0.920795
GO:0045785	positive regulation of cell adhesion	2	258	50	21206	0.123687	0.222505	3.28775	0.907676
GO:0032092	positive regulation of protein binding	2	258	50	21206	0.123687	0.222505	3.28775	0.907676
GO:2001222	regulation of neuron migration	1	258	11	21206	0.126007	0.222505	7.47216	0.899606
GO:2000177	regulation of neural precursor cell proliferation	1	258	11	21206	0.126007	0.222505	7.47216	0.899606
GO:0016486	peptide hormone processing	1	258	11	21206	0.126007	0.222505	7.47216	0.899606
GO:0021819	layer formation in cerebral cortex	1	258	11	21206	0.126007	0.222505	7.47216	0.899606
GO:1902176	negative regulation of oxidative stress-induced intrinsic apoptotic signaling pathway	1	258	11	21206	0.126007	0.222505	7.47216	0.899606
GO:0032940	secretion by cell	1	258	11	21206	0.126007	0.222505	7.47216	0.899606
GO:0031115	negative regulation of microtubule polymerization	1	258	11	21206	0.126007	0.222505	7.47216	0.899606
GO:0001935	endothelial cell proliferation	1	258	11	21206	0.126007	0.222505	7.47216	0.899606
GO:0032461	positive regulation of protein oligomerization	1	258	11	21206	0.126007	0.222505	7.47216	0.899606
GO:0030033	microvillus assembly	1	258	11	21206	0.126007	0.222505	7.47216	0.899606
GO:0002639	positive regulation of immunoglobulin production	1	258	11	21206	0.126007	0.222505	7.47216	0.899606
GO:0034698	response to gonadotropin	1	258	11	21206	0.126007	0.222505	7.47216	0.899606
GO:0048853	forebrain morphogenesis	1	258	11	21206	0.126007	0.222505	7.47216	0.899606
GO:0051967	negative regulation of synaptic transmission, glutamatergic	1	258	11	21206	0.126007	0.222505	7.47216	0.899606
GO:0030857	negative regulation of epithelial cell differentiation	1	258	11	21206	0.126007	0.222505	7.47216	0.899606
GO:0048103	somatic stem cell division	1	258	11	21206	0.126007	0.222505	7.47216	0.899606
GO:0043517	positive regulation of DNA damage response, signal transduction by p53 class mediator	1	258	11	21206	0.126007	0.222505	7.47216	0.899606
GO:0060068	vagina development	1	258	11	21206	0.126007	0.222505	7.47216	0.899606
GO:0006596	polyamine biosynthetic process	1	258	11	21206	0.126007	0.222505	7.47216	0.899606
GO:0010759	positive regulation of macrophage chemotaxis	1	258	11	21206	0.126007	0.222505	7.47216	0.899606
GO:0018298	protein-chromophore linkage	1	258	11	21206	0.126007	0.222505	7.47216	0.899606
GO:0010923	negative regulation of phosphatase activity	2	258	51	21206	0.12775	0.224675	3.22329	0.893639
GO:0050727	regulation of inflammatory response	2	258	51	21206	0.12775	0.224675	3.22329	0.893639
GO:0007368	determination of left/right symmetry	2	258	51	21206	0.12775	0.224675	3.22329	0.893639
GO:0055085	transmembrane transport	9	258	478	21206	0.130587	0.228091	1.54758	0.884101
GO:0007566	embryo implantation	2	258	52	21206	0.131844	0.228091	3.1613	0.87994
GO:0031398	positive regulation of protein ubiquitination	2	258	52	21206	0.131844	0.228091	3.1613	0.87994
GO:0071333	cellular response to glucose stimulus	2	258	52	21206	0.131844	0.228091	3.1613	0.87994
GO:0001501	skeletal system development	3	258	104	21206	0.133535	0.228091	2.37097	0.874405
GO:0048246	macrophage chemotaxis	1	258	12	21206	0.136646	0.228091	6.84948	0.864404
GO:0050771	negative regulation of axonogenesis	1	258	12	21206	0.136646	0.228091	6.84948	0.864404
GO:0045197	establishment or maintenance of epithelial cell apical/basal polarity	1	258	12	21206	0.136646	0.228091	6.84948	0.864404
GO:2000178	negative regulation of neural precursor cell proliferation	1	258	12	21206	0.136646	0.228091	6.84948	0.864404
GO:0042789	mRNA transcription from RNA polymerase II promoter	1	258	12	21206	0.136646	0.228091	6.84948	0.864404
GO:0051272	positive regulation of cellular component movement	1	258	12	21206	0.136646	0.228091	6.84948	0.864404
GO:0016051	carbohydrate biosynthetic process	1	258	12	21206	0.136646	0.228091	6.84948	0.864404
GO:0060394	negative regulation of pathway-restricted SMAD protein phosphorylation	1	258	12	21206	0.136646	0.228091	6.84948	0.864404
GO:0051481	negative regulation of cytosolic calcium ion concentration	1	258	12	21206	0.136646	0.228091	6.84948	0.864404
GO:0001945	lymph vessel development	1	258	12	21206	0.136646	0.228091	6.84948	0.864404
GO:0007020	microtubule nucleation	1	258	12	21206	0.136646	0.228091	6.84948	0.864404
GO:0046621	negative regulation of organ growth	1	258	12	21206	0.136646	0.228091	6.84948	0.864404
GO:0033762	response to glucagon	1	258	12	21206	0.136646	0.228091	6.84948	0.864404
GO:0022617	extracellular matrix disassembly	1	258	12	21206	0.136646	0.228091	6.84948	0.864404
GO:0040037	negative regulation of fibroblast growth factor receptor signaling pathway	1	258	12	21206	0.136646	0.228091	6.84948	0.864404
GO:0090303	positive regulation of wound healing	1	258	12	21206	0.136646	0.228091	6.84948	0.864404
GO:0033555	multicellular organismal response to stress	1	258	12	21206	0.136646	0.228091	6.84948	0.864404
GO:0060999	positive regulation of dendritic spine development	1	258	12	21206	0.136646	0.228091	6.84948	0.864404
GO:0060306	regulation of membrane repolarization	1	258	12	21206	0.136646	0.228091	6.84948	0.864404
GO:0030903	notochord development	1	258	12	21206	0.136646	0.228091	6.84948	0.864404
GO:0034260	negative regulation of GTPase activity	1	258	12	21206	0.136646	0.228091	6.84948	0.864404
GO:0048608	reproductive structure development	1	258	12	21206	0.136646	0.228091	6.84948	0.864404
GO:0050709	negative regulation of protein secretion	1	258	12	21206	0.136646	0.228091	6.84948	0.864404
GO:0071625	vocalization behavior	1	258	12	21206	0.136646	0.228091	6.84948	0.864404
GO:0045956	positive regulation of calcium ion-dependent exocytosis	1	258	12	21206	0.136646	0.228091	6.84948	0.864404
GO:0048172	regulation of short-term neuronal synaptic plasticity	1	258	12	21206	0.136646	0.228091	6.84948	0.864404
GO:0010832	negative regulation of myotube differentiation	1	258	12	21206	0.136646	0.228091	6.84948	0.864404
GO:0042640	anagen	1	258	12	21206	0.136646	0.228091	6.84948	0.864404
GO:0010763	positive regulation of fibroblast migration	1	258	12	21206	0.136646	0.228091	6.84948	0.864404
GO:0035640	exploration behavior	1	258	12	21206	0.136646	0.228091	6.84948	0.864404
GO:0030194	positive regulation of blood coagulation	1	258	12	21206	0.136646	0.228091	6.84948	0.864404
GO:0051932	synaptic transmission, GABAergic	1	258	12	21206	0.136646	0.228091	6.84948	0.864404
GO:0001886	endothelial cell morphogenesis	1	258	12	21206	0.136646	0.228091	6.84948	0.864404
GO:0055089	fatty acid homeostasis	1	258	12	21206	0.136646	0.228091	6.84948	0.864404
GO:0008053	mitochondrial fusion	1	258	12	21206	0.136646	0.228091	6.84948	0.864404
GO:0060326	cell chemotaxis	2	258	54	21206	0.14012	0.233593	3.04421	0.853499
GO:0051056	regulation of small GTPase mediated signal transduction	2	258	55	21206	0.1443	0.236313	2.98887	0.840735
GO:0016337	single organismal cell-cell adhesion	3	258	108	21206	0.14472	0.236313	2.28316	0.839471
GO:0051642	centrosome localization	1	258	13	21206	0.147156	0.236313	6.3226	0.832223
GO:0071257	cellular response to electrical stimulus	1	258	13	21206	0.147156	0.236313	6.3226	0.832223
GO:0060134	prepulse inhibition	1	258	13	21206	0.147156	0.236313	6.3226	0.832223
GO:0060576	intestinal epithelial cell development	1	258	13	21206	0.147156	0.236313	6.3226	0.832223
GO:0036092	phosphatidylinositol-3-phosphate biosynthetic process	1	258	13	21206	0.147156	0.236313	6.3226	0.832223
GO:0002087	regulation of respiratory gaseous exchange by neurological system process	1	258	13	21206	0.147156	0.236313	6.3226	0.832223
GO:0016239	positive regulation of macroautophagy	1	258	13	21206	0.147156	0.236313	6.3226	0.832223
GO:0022904	respiratory electron transport chain	1	258	13	21206	0.147156	0.236313	6.3226	0.832223
GO:0061036	positive regulation of cartilage development	1	258	13	21206	0.147156	0.236313	6.3226	0.832223
GO:0043616	keratinocyte proliferation	1	258	13	21206	0.147156	0.236313	6.3226	0.832223
GO:0031649	heat generation	1	258	13	21206	0.147156	0.236313	6.3226	0.832223
GO:0007252	I-kappaB phosphorylation	1	258	13	21206	0.147156	0.236313	6.3226	0.832223
GO:0046855	inositol phosphate dephosphorylation	1	258	13	21206	0.147156	0.236313	6.3226	0.832223
GO:2000649	regulation of sodium ion transmembrane transporter activity	1	258	13	21206	0.147156	0.236313	6.3226	0.832223
GO:0060307	regulation of ventricular cardiac muscle cell membrane repolarization	1	258	13	21206	0.147156	0.236313	6.3226	0.832223
GO:0001783	B cell apoptotic process	1	258	13	21206	0.147156	0.236313	6.3226	0.832223
GO:0071396	cellular response to lipid	1	258	13	21206	0.147156	0.236313	6.3226	0.832223
GO:0071383	cellular response to steroid hormone stimulus	1	258	13	21206	0.147156	0.236313	6.3226	0.832223
GO:0060444	branching involved in mammary gland duct morphogenesis	1	258	13	21206	0.147156	0.236313	6.3226	0.832223
GO:2000060	positive regulation of protein ubiquitination involved in ubiquitin-dependent protein catabolic process	1	258	13	21206	0.147156	0.236313	6.3226	0.832223
GO:0047496	vesicle transport along microtubule	1	258	13	21206	0.147156	0.236313	6.3226	0.832223
GO:0070498	interleukin-1-mediated signaling pathway	1	258	13	21206	0.147156	0.236313	6.3226	0.832223
GO:0010812	negative regulation of cell-substrate adhesion	1	258	13	21206	0.147156	0.236313	6.3226	0.832223
GO:0006536	glutamate metabolic process	1	258	13	21206	0.147156	0.236313	6.3226	0.832223
GO:0006779	porphyrin-containing compound biosynthetic process	1	258	13	21206	0.147156	0.236313	6.3226	0.832223
GO:0010524	positive regulation of calcium ion transport into cytosol	1	258	13	21206	0.147156	0.236313	6.3226	0.832223
GO:0043069	negative regulation of programmed cell death	1	258	13	21206	0.147156	0.236313	6.3226	0.832223
GO:0043281	regulation of cysteine-type endopeptidase activity involved in apoptotic process	1	258	13	21206	0.147156	0.236313	6.3226	0.832223
GO:0001947	heart looping	2	258	56	21206	0.148505	0.238189	2.93549	0.828259
GO:0007264	small GTPase mediated signal transduction	5	258	230	21206	0.14987	0.240085	1.78682	0.824285
GO:0045766	positive regulation of angiogenesis	3	258	110	21206	0.150425	0.240681	2.24165	0.822679
GO:0006915	apoptotic process	10	258	565	21206	0.15285	0.242594	1.45476	0.815735
GO:0042733	embryonic digit morphogenesis	2	258	58	21206	0.156988	0.242594	2.83427	0.804133
GO:0048812	neuron projection morphogenesis	2	258	58	21206	0.156988	0.242594	2.83427	0.804133
GO:0071498	cellular response to fluid shear stress	1	258	14	21206	0.157538	0.242594	5.87099	0.802615
GO:2000353	positive regulation of endothelial cell apoptotic process	1	258	14	21206	0.157538	0.242594	5.87099	0.802615
GO:0048011	neurotrophin TRK receptor signaling pathway	1	258	14	21206	0.157538	0.242594	5.87099	0.802615
GO:1900153	positive regulation of nuclear-transcribed mRNA catabolic process, deadenylation-dependent decay	1	258	14	21206	0.157538	0.242594	5.87099	0.802615
GO:0042711	maternal behavior	1	258	14	21206	0.157538	0.242594	5.87099	0.802615
GO:0035137	hindlimb morphogenesis	1	258	14	21206	0.157538	0.242594	5.87099	0.802615
GO:0048699	generation of neurons	1	258	14	21206	0.157538	0.242594	5.87099	0.802615
GO:0021854	hypothalamus development	1	258	14	21206	0.157538	0.242594	5.87099	0.802615
GO:0042993	positive regulation of transcription factor import into nucleus	1	258	14	21206	0.157538	0.242594	5.87099	0.802615
GO:0007263	nitric oxide mediated signal transduction	1	258	14	21206	0.157538	0.242594	5.87099	0.802615
GO:0032438	melanosome organization	1	258	14	21206	0.157538	0.242594	5.87099	0.802615
GO:0001953	negative regulation of cell-matrix adhesion	1	258	14	21206	0.157538	0.242594	5.87099	0.802615
GO:0009651	response to salt stress	1	258	14	21206	0.157538	0.242594	5.87099	0.802615
GO:0032270	positive regulation of cellular protein metabolic process	1	258	14	21206	0.157538	0.242594	5.87099	0.802615
GO:0042059	negative regulation of epidermal growth factor receptor signaling pathway	1	258	14	21206	0.157538	0.242594	5.87099	0.802615
GO:0030818	negative regulation of cAMP biosynthetic process	1	258	14	21206	0.157538	0.242594	5.87099	0.802615
GO:0048148	behavioral response to cocaine	1	258	14	21206	0.157538	0.242594	5.87099	0.802615
GO:0060216	definitive hemopoiesis	1	258	14	21206	0.157538	0.242594	5.87099	0.802615
GO:0042417	dopamine metabolic process	1	258	14	21206	0.157538	0.242594	5.87099	0.802615
GO:0060081	membrane hyperpolarization	1	258	14	21206	0.157538	0.242594	5.87099	0.802615
GO:0006790	sulfur compound metabolic process	1	258	14	21206	0.157538	0.242594	5.87099	0.802615
GO:0043950	positive regulation of cAMP-mediated signaling	1	258	14	21206	0.157538	0.242594	5.87099	0.802615
GO:0001823	mesonephros development	1	258	14	21206	0.157538	0.242594	5.87099	0.802615
GO:0018279	protein N-linked glycosylation via asparagine	1	258	14	21206	0.157538	0.242594	5.87099	0.802615
GO:0006024	glycosaminoglycan biosynthetic process	1	258	14	21206	0.157538	0.242594	5.87099	0.802615
GO:0019395	fatty acid oxidation	1	258	14	21206	0.157538	0.242594	5.87099	0.802615
GO:0051298	centrosome duplication	1	258	14	21206	0.157538	0.242594	5.87099	0.802615
GO:0031076	embryonic camera-type eye development	1	258	14	21206	0.157538	0.242594	5.87099	0.802615
GO:0043267	negative regulation of potassium ion transport	1	258	14	21206	0.157538	0.242594	5.87099	0.802615
GO:0009966	regulation of signal transduction	2	258	59	21206	0.161264	0.24804	2.78623	0.792463
GO:0030182	neuron differentiation	3	258	115	21206	0.164993	0.249034	2.14419	0.782535
GO:0032922	circadian regulation of gene expression	2	258	60	21206	0.16556	0.249034	2.73979	0.781044
GO:0006950	response to stress	2	258	60	21206	0.16556	0.249034	2.73979	0.781044
GO:0008277	regulation of G-protein coupled receptor protein signaling pathway	2	258	60	21206	0.16556	0.249034	2.73979	0.781044
GO:0090263	positive regulation of canonical Wnt signaling pathway	2	258	60	21206	0.16556	0.249034	2.73979	0.781044
GO:0048490	anterograde synaptic vesicle transport	1	258	15	21206	0.167794	0.249034	5.47959	0.775222
GO:0006825	copper ion transport	1	258	15	21206	0.167794	0.249034	5.47959	0.775222
GO:2000179	positive regulation of neural precursor cell proliferation	1	258	15	21206	0.167794	0.249034	5.47959	0.775222
GO:0006672	ceramide metabolic process	1	258	15	21206	0.167794	0.249034	5.47959	0.775222
GO:0010971	positive regulation of G2/M transition of mitotic cell cycle	1	258	15	21206	0.167794	0.249034	5.47959	0.775222
GO:0001946	lymphangiogenesis	1	258	15	21206	0.167794	0.249034	5.47959	0.775222
GO:0010633	negative regulation of epithelial cell migration	1	258	15	21206	0.167794	0.249034	5.47959	0.775222
GO:0050901	leukocyte tethering or rolling	1	258	15	21206	0.167794	0.249034	5.47959	0.775222
GO:0050710	negative regulation of cytokine secretion	1	258	15	21206	0.167794	0.249034	5.47959	0.775222
GO:0050732	negative regulation of peptidyl-tyrosine phosphorylation	1	258	15	21206	0.167794	0.249034	5.47959	0.775222
GO:0045333	cellular respiration	1	258	15	21206	0.167794	0.249034	5.47959	0.775222
GO:0045579	positive regulation of B cell differentiation	1	258	15	21206	0.167794	0.249034	5.47959	0.775222
GO:0044257	cellular protein catabolic process	1	258	15	21206	0.167794	0.249034	5.47959	0.775222
GO:0046685	response to arsenic-containing substance	1	258	15	21206	0.167794	0.249034	5.47959	0.775222
GO:0071371	cellular response to gonadotropin stimulus	1	258	15	21206	0.167794	0.249034	5.47959	0.775222
GO:0050678	regulation of epithelial cell proliferation	1	258	15	21206	0.167794	0.249034	5.47959	0.775222
GO:0016578	histone deubiquitination	1	258	15	21206	0.167794	0.249034	5.47959	0.775222
GO:0015693	magnesium ion transport	1	258	15	21206	0.167794	0.249034	5.47959	0.775222
GO:0007413	axonal fasciculation	1	258	15	21206	0.167794	0.249034	5.47959	0.775222
GO:0040015	negative regulation of multicellular organism growth	1	258	15	21206	0.167794	0.249034	5.47959	0.775222
GO:0001833	inner cell mass cell proliferation	1	258	15	21206	0.167794	0.249034	5.47959	0.775222
GO:0051290	protein heterotetramerization	1	258	15	21206	0.167794	0.249034	5.47959	0.775222
GO:0014912	negative regulation of smooth muscle cell migration	1	258	15	21206	0.167794	0.249034	5.47959	0.775222
GO:0045022	early endosome to late endosome transport	1	258	15	21206	0.167794	0.249034	5.47959	0.775222
GO:0007194	negative regulation of adenylate cyclase activity	1	258	15	21206	0.167794	0.249034	5.47959	0.775222
GO:0048712	negative regulation of astrocyte differentiation	1	258	15	21206	0.167794	0.249034	5.47959	0.775222
GO:0006461	protein complex assembly	2	258	61	21206	0.169877	0.251272	2.69488	0.769865
GO:0007030	Golgi organization	2	258	61	21206	0.169877	0.251272	2.69488	0.769865
GO:0023014	signal transduction by phosphorylation	2	258	61	21206	0.169877	0.251272	2.69488	0.769865
GO:0045454	cell redox homeostasis	2	258	62	21206	0.174212	0.257395	2.65141	0.758921
GO:0006897	endocytosis	4	258	180	21206	0.177006	0.259377	1.82653	0.752011
GO:2001241	positive regulation of extrinsic apoptotic signaling pathway in absence of ligand	1	258	16	21206	0.177927	0.259377	5.13711	0.749759
GO:0071285	cellular response to lithium ion	1	258	16	21206	0.177927	0.259377	5.13711	0.749759
GO:0048066	developmental pigmentation	1	258	16	21206	0.177927	0.259377	5.13711	0.749759
GO:0043122	regulation of I-kappaB kinase/NF-kappaB signaling	1	258	16	21206	0.177927	0.259377	5.13711	0.749759
GO:0032230	positive regulation of synaptic transmission, GABAergic	1	258	16	21206	0.177927	0.259377	5.13711	0.749759
GO:2000648	positive regulation of stem cell proliferation	1	258	16	21206	0.177927	0.259377	5.13711	0.749759
GO:0010035	response to inorganic substance	1	258	16	21206	0.177927	0.259377	5.13711	0.749759
GO:0035024	negative regulation of Rho protein signal transduction	1	258	16	21206	0.177927	0.259377	5.13711	0.749759
GO:0043488	regulation of mRNA stability	1	258	16	21206	0.177927	0.259377	5.13711	0.749759
GO:0006071	glycerol metabolic process	1	258	16	21206	0.177927	0.259377	5.13711	0.749759
GO:0043277	apoptotic cell clearance	1	258	16	21206	0.177927	0.259377	5.13711	0.749759
GO:0048839	inner ear development	2	258	63	21206	0.178565	0.259444	2.60933	0.748203
GO:0019827	stem cell maintenance	2	258	63	21206	0.178565	0.259444	2.60933	0.748203
GO:0043085	positive regulation of catalytic activity	2	258	63	21206	0.178565	0.259444	2.60933	0.748203
GO:0001570	vasculogenesis	2	258	64	21206	0.182935	0.265291	2.56856	0.737703
GO:0070588	calcium ion transmembrane transport	3	258	121	21206	0.182994	0.265291	2.03786	0.737563
GO:0071407	cellular response to organic cyclic compound	2	258	65	21206	0.187321	0.268597	2.52904	0.727414
GO:0032088	negative regulation of NF-kappaB transcription factor activity	2	258	65	21206	0.187321	0.268597	2.52904	0.727414
GO:0071356	cellular response to tumor necrosis factor	2	258	65	21206	0.187321	0.268597	2.52904	0.727414
GO:0051289	protein homotetramerization	2	258	65	21206	0.187321	0.268597	2.52904	0.727414
GO:1901216	positive regulation of neuron death	1	258	17	21206	0.187936	0.268597	4.83493	0.725991
GO:0019226	transmission of nerve impulse	1	258	17	21206	0.187936	0.268597	4.83493	0.725991
GO:0007274	neuromuscular synaptic transmission	1	258	17	21206	0.187936	0.268597	4.83493	0.725991
GO:0006995	cellular response to nitrogen starvation	1	258	17	21206	0.187936	0.268597	4.83493	0.725991
GO:0021954	central nervous system neuron development	1	258	17	21206	0.187936	0.268597	4.83493	0.725991
GO:0015012	heparan sulfate proteoglycan biosynthetic process	1	258	17	21206	0.187936	0.268597	4.83493	0.725991
GO:0032402	melanosome transport	1	258	17	21206	0.187936	0.268597	4.83493	0.725991
GO:0010596	negative regulation of endothelial cell migration	1	258	17	21206	0.187936	0.268597	4.83493	0.725991
GO:0048546	digestive tract morphogenesis	1	258	17	21206	0.187936	0.268597	4.83493	0.725991
GO:0032868	response to insulin	2	258	66	21206	0.191721	0.273708	2.49072	0.717331
GO:0030324	lung development	3	258	124	21206	0.192185	0.274072	1.98856	0.716281
GO:0033138	positive regulation of peptidyl-serine phosphorylation	2	258	67	21206	0.196134	0.275818	2.45355	0.707447
GO:0071363	cellular response to growth factor stimulus	2	258	67	21206	0.196134	0.275818	2.45355	0.707447
GO:0032870	cellular response to hormone stimulus	2	258	67	21206	0.196134	0.275818	2.45355	0.707447
GO:1990090	cellular response to nerve growth factor stimulus	1	258	18	21206	0.197824	0.275818	4.56632	0.703722
GO:0048278	vesicle docking	1	258	18	21206	0.197824	0.275818	4.56632	0.703722
GO:0033189	response to vitamin A	1	258	18	21206	0.197824	0.275818	4.56632	0.703722
GO:0002089	lens morphogenesis in camera-type eye	1	258	18	21206	0.197824	0.275818	4.56632	0.703722
GO:0030539	male genitalia development	1	258	18	21206	0.197824	0.275818	4.56632	0.703722
GO:0046928	regulation of neurotransmitter secretion	1	258	18	21206	0.197824	0.275818	4.56632	0.703722
GO:0002076	osteoblast development	1	258	18	21206	0.197824	0.275818	4.56632	0.703722
GO:0051693	actin filament capping	1	258	18	21206	0.197824	0.275818	4.56632	0.703722
GO:0010507	negative regulation of autophagy	1	258	18	21206	0.197824	0.275818	4.56632	0.703722
GO:0046856	phosphatidylinositol dephosphorylation	1	258	18	21206	0.197824	0.275818	4.56632	0.703722
GO:0031589	cell-substrate adhesion	1	258	18	21206	0.197824	0.275818	4.56632	0.703722
GO:0090314	positive regulation of protein targeting to membrane	1	258	18	21206	0.197824	0.275818	4.56632	0.703722
GO:0007052	mitotic spindle organization	1	258	18	21206	0.197824	0.275818	4.56632	0.703722
GO:0015908	fatty acid transport	1	258	18	21206	0.197824	0.275818	4.56632	0.703722
GO:0032465	regulation of cytokinesis	1	258	18	21206	0.197824	0.275818	4.56632	0.703722
GO:0001774	microglial cell activation	1	258	18	21206	0.197824	0.275818	4.56632	0.703722
GO:0045598	regulation of fat cell differentiation	1	258	18	21206	0.197824	0.275818	4.56632	0.703722
GO:0031032	actomyosin structure organization	1	258	18	21206	0.197824	0.275818	4.56632	0.703722
GO:0040008	regulation of growth	2	258	68	21206	0.20056	0.279337	2.41746	0.697755
GO:0001666	response to hypoxia	4	258	191	21206	0.204008	0.283838	1.72134	0.690352
GO:0007018	microtubule-based movement	2	258	69	21206	0.204998	0.284913	2.38243	0.68825
GO:0000070	mitotic sister chromatid segregation	1	258	19	21206	0.207591	0.285194	4.32599	0.682791
GO:0048266	behavioral response to pain	1	258	19	21206	0.207591	0.285194	4.32599	0.682791
GO:0007548	sex differentiation	1	258	19	21206	0.207591	0.285194	4.32599	0.682791
GO:0010460	positive regulation of heart rate	1	258	19	21206	0.207591	0.285194	4.32599	0.682791
GO:0045582	positive regulation of T cell differentiation	1	258	19	21206	0.207591	0.285194	4.32599	0.682791
GO:0030866	cortical actin cytoskeleton organization	1	258	19	21206	0.207591	0.285194	4.32599	0.682791
GO:0061178	regulation of insulin secretion involved in cellular response to glucose stimulus	1	258	19	21206	0.207591	0.285194	4.32599	0.682791
GO:0003281	ventricular septum development	1	258	19	21206	0.207591	0.285194	4.32599	0.682791
GO:0032318	regulation of Ras GTPase activity	1	258	19	21206	0.207591	0.285194	4.32599	0.682791
GO:0032332	positive regulation of chondrocyte differentiation	1	258	19	21206	0.207591	0.285194	4.32599	0.682791
GO:0055088	lipid homeostasis	1	258	19	21206	0.207591	0.285194	4.32599	0.682791
GO:0030521	androgen receptor signaling pathway	1	258	20	21206	0.217241	0.295357	4.10969	0.663059
GO:0045778	positive regulation of ossification	1	258	20	21206	0.217241	0.295357	4.10969	0.663059
GO:0097193	intrinsic apoptotic signaling pathway	1	258	20	21206	0.217241	0.295357	4.10969	0.663059
GO:0030041	actin filament polymerization	1	258	20	21206	0.217241	0.295357	4.10969	0.663059
GO:0035307	positive regulation of protein dephosphorylation	1	258	20	21206	0.217241	0.295357	4.10969	0.663059
GO:0033365	protein localization to organelle	1	258	20	21206	0.217241	0.295357	4.10969	0.663059
GO:0043153	entrainment of circadian clock by photoperiod	1	258	20	21206	0.217241	0.295357	4.10969	0.663059
GO:0006807	nitrogen compound metabolic process	1	258	20	21206	0.217241	0.295357	4.10969	0.663059
GO:0044804	nucleophagy	1	258	20	21206	0.217241	0.295357	4.10969	0.663059
GO:0045638	negative regulation of myeloid cell differentiation	1	258	20	21206	0.217241	0.295357	4.10969	0.663059
GO:0032851	positive regulation of Rab GTPase activity	2	258	72	21206	0.218372	0.296588	2.28316	0.660803
GO:0007155	cell adhesion	9	258	545	21206	0.220927	0.299748	1.35733	0.655752
GO:0007179	transforming growth factor beta receptor signaling pathway	2	258	73	21206	0.222848	0.302041	2.25188	0.651992
GO:0070371	ERK1 and ERK2 cascade	1	258	21	21206	0.226773	0.303598	3.91399	0.644409
GO:0019933	cAMP-mediated signaling	1	258	21	21206	0.226773	0.303598	3.91399	0.644409
GO:0030010	establishment of cell polarity	1	258	21	21206	0.226773	0.303598	3.91399	0.644409
GO:0032008	positive regulation of TOR signaling	1	258	21	21206	0.226773	0.303598	3.91399	0.644409
GO:0046697	decidualization	1	258	21	21206	0.226773	0.303598	3.91399	0.644409
GO:0030902	hindbrain development	1	258	21	21206	0.226773	0.303598	3.91399	0.644409
GO:0000188	inactivation of MAPK activity	1	258	21	21206	0.226773	0.303598	3.91399	0.644409
GO:0050880	regulation of blood vessel size	1	258	21	21206	0.226773	0.303598	3.91399	0.644409
GO:0046513	ceramide biosynthetic process	1	258	21	21206	0.226773	0.303598	3.91399	0.644409
GO:0045879	negative regulation of smoothened signaling pathway	1	258	21	21206	0.226773	0.303598	3.91399	0.644409
GO:0071526	semaphorin-plexin signaling pathway	1	258	21	21206	0.226773	0.303598	3.91399	0.644409
GO:0008089	anterograde axon cargo transport	1	258	21	21206	0.226773	0.303598	3.91399	0.644409
GO:0001933	negative regulation of protein phosphorylation	2	258	74	21206	0.22733	0.303724	2.22145	0.643343
GO:0007596	blood coagulation	2	258	74	21206	0.22733	0.303724	2.22145	0.643343
GO:0008283	cell proliferation	4	258	202	21206	0.232125	0.309815	1.6276	0.634278
GO:0000060	protein import into nucleus, translocation	1	258	22	21206	0.23619	0.312065	3.73608	0.626739
GO:0048010	vascular endothelial growth factor receptor signaling pathway	1	258	22	21206	0.23619	0.312065	3.73608	0.626739
GO:0002026	regulation of the force of heart contraction	1	258	22	21206	0.23619	0.312065	3.73608	0.626739
GO:0014065	phosphatidylinositol 3-kinase signaling	1	258	22	21206	0.23619	0.312065	3.73608	0.626739
GO:0042311	vasodilation	1	258	22	21206	0.23619	0.312065	3.73608	0.626739
GO:0042517	positive regulation of tyrosine phosphorylation of Stat3 protein	1	258	22	21206	0.23619	0.312065	3.73608	0.626739
GO:0007026	negative regulation of microtubule depolymerization	1	258	22	21206	0.23619	0.312065	3.73608	0.626739
GO:0031572	G2 DNA damage checkpoint	1	258	22	21206	0.23619	0.312065	3.73608	0.626739
GO:0071158	positive regulation of cell cycle arrest	1	258	22	21206	0.23619	0.312065	3.73608	0.626739
GO:0050806	positive regulation of synaptic transmission	1	258	22	21206	0.23619	0.312065	3.73608	0.626739
GO:0006816	calcium ion transport	3	258	140	21206	0.242888	0.319847	1.7613	0.614594
GO:0000226	microtubule cytoskeleton organization	2	258	78	21206	0.245316	0.319847	2.10753	0.610275
GO:0060021	palate development	2	258	78	21206	0.245316	0.319847	2.10753	0.610275
GO:0006402	mRNA catabolic process	1	258	23	21206	0.245492	0.319847	3.57364	0.609962
GO:0007585	respiratory gaseous exchange	1	258	23	21206	0.245492	0.319847	3.57364	0.609962
GO:0045765	regulation of angiogenesis	1	258	23	21206	0.245492	0.319847	3.57364	0.609962
GO:0031146	SCF-dependent proteasomal ubiquitin-dependent protein catabolic process	1	258	23	21206	0.245492	0.319847	3.57364	0.609962
GO:0048844	artery morphogenesis	1	258	23	21206	0.245492	0.319847	3.57364	0.609962
GO:0036342	post-anal tail morphogenesis	1	258	23	21206	0.245492	0.319847	3.57364	0.609962
GO:0045662	negative regulation of myoblast differentiation	1	258	23	21206	0.245492	0.319847	3.57364	0.609962
GO:0001836	release of cytochrome c from mitochondria	1	258	23	21206	0.245492	0.319847	3.57364	0.609962
GO:0010765	positive regulation of sodium ion transport	1	258	23	21206	0.245492	0.319847	3.57364	0.609962
GO:0006094	gluconeogenesis	1	258	23	21206	0.245492	0.319847	3.57364	0.609962
GO:0045475	locomotor rhythm	1	258	23	21206	0.245492	0.319847	3.57364	0.609962
GO:0007568	aging	3	258	141	21206	0.246132	0.320362	1.7488	0.608832
GO:0034220	ion transmembrane transport	4	258	208	21206	0.247847	0.322275	1.58065	0.605816
GO:0007417	central nervous system development	2	258	79	21206	0.249822	0.324521	2.08086	0.602369
GO:0019915	lipid storage	1	258	24	21206	0.254682	0.32663	3.42474	0.594002
GO:0006611	protein export from nucleus	1	258	24	21206	0.254682	0.32663	3.42474	0.594002
GO:2000377	regulation of reactive oxygen species metabolic process	1	258	24	21206	0.254682	0.32663	3.42474	0.594002
GO:2001234	negative regulation of apoptotic signaling pathway	1	258	24	21206	0.254682	0.32663	3.42474	0.594002
GO:0014003	oligodendrocyte development	1	258	24	21206	0.254682	0.32663	3.42474	0.594002
GO:0032967	positive regulation of collagen biosynthetic process	1	258	24	21206	0.254682	0.32663	3.42474	0.594002
GO:0009987	cellular process	1	258	24	21206	0.254682	0.32663	3.42474	0.594002
GO:0009416	response to light stimulus	1	258	24	21206	0.254682	0.32663	3.42474	0.594002
GO:0001578	microtubule bundle formation	1	258	24	21206	0.254682	0.32663	3.42474	0.594002
GO:0016338	calcium-independent cell-cell adhesion via plasma membrane cell-adhesion molecules	1	258	24	21206	0.254682	0.32663	3.42474	0.594002
GO:0007178	transmembrane receptor protein serine/threonine kinase signaling pathway	1	258	24	21206	0.254682	0.32663	3.42474	0.594002
GO:0043278	response to morphine	1	258	24	21206	0.254682	0.32663	3.42474	0.594002
GO:0048738	cardiac muscle tissue development	1	258	24	21206	0.254682	0.32663	3.42474	0.594002
GO:0007420	brain development	4	258	212	21206	0.258455	0.331146	1.55083	0.587615
GO:0032869	cellular response to insulin stimulus	2	258	81	21206	0.258841	0.331317	2.02948	0.586966
GO:0006954	inflammatory response	5	258	283	21206	0.262487	0.334028	1.45219	0.580893
GO:0010628	positive regulation of gene expression	5	258	283	21206	0.262487	0.334028	1.45219	0.580893
GO:0030097	hemopoiesis	2	258	82	21206	0.263353	0.334028	2.00473	0.579462
GO:0051412	response to corticosterone	1	258	25	21206	0.26376	0.334028	3.28775	0.578791
GO:0072332	intrinsic apoptotic signaling pathway by p53 class mediator	1	258	25	21206	0.26376	0.334028	3.28775	0.578791
GO:2000378	negative regulation of reactive oxygen species metabolic process	1	258	25	21206	0.26376	0.334028	3.28775	0.578791
GO:0051491	positive regulation of filopodium assembly	1	258	25	21206	0.26376	0.334028	3.28775	0.578791
GO:0008637	apoptotic mitochondrial changes	1	258	25	21206	0.26376	0.334028	3.28775	0.578791
GO:0021537	telencephalon development	1	258	25	21206	0.26376	0.334028	3.28775	0.578791
GO:0043552	positive regulation of phosphatidylinositol 3-kinase activity	1	258	25	21206	0.26376	0.334028	3.28775	0.578791
GO:0035235	ionotropic glutamate receptor signaling pathway	1	258	25	21206	0.26376	0.334028	3.28775	0.578791
GO:0014070	response to organic cyclic compound	3	258	147	21206	0.265728	0.336196	1.67742	0.575563
GO:0050731	positive regulation of peptidyl-tyrosine phosphorylation	2	258	84	21206	0.272376	0.344057	1.957	0.56483
GO:0071364	cellular response to epidermal growth factor stimulus	1	258	26	21206	0.272728	0.344057	3.1613	0.564271
GO:0061098	positive regulation of protein tyrosine kinase activity	1	258	26	21206	0.272728	0.344057	3.1613	0.564271
GO:0002009	morphogenesis of an epithelium	1	258	27	21206	0.281587	0.354211	3.04421	0.550387
GO:0031648	protein destabilization	1	258	27	21206	0.281587	0.354211	3.04421	0.550387
GO:0071375	cellular response to peptide hormone stimulus	1	258	27	21206	0.281587	0.354211	3.04421	0.550387
GO:0001934	positive regulation of protein phosphorylation	3	258	152	21206	0.282198	0.354639	1.62225	0.549446
GO:0048015	phosphatidylinositol-mediated signaling	1	258	28	21206	0.290339	0.363477	2.93549	0.537095
GO:0006493	protein O-linked glycosylation	1	258	28	21206	0.290339	0.363477	2.93549	0.537095
GO:0001937	negative regulation of endothelial cell proliferation	1	258	28	21206	0.290339	0.363477	2.93549	0.537095
GO:0051965	positive regulation of synapse assembly	1	258	28	21206	0.290339	0.363477	2.93549	0.537095
GO:2000134	negative regulation of G1/S transition of mitotic cell cycle	1	258	29	21206	0.298984	0.370763	2.83427	0.524352
GO:0007569	cell aging	1	258	29	21206	0.298984	0.370763	2.83427	0.524352
GO:0007257	activation of JUN kinase activity	1	258	29	21206	0.298984	0.370763	2.83427	0.524352
GO:0021522	spinal cord motor neuron differentiation	1	258	29	21206	0.298984	0.370763	2.83427	0.524352
GO:0050714	positive regulation of protein secretion	1	258	29	21206	0.298984	0.370763	2.83427	0.524352
GO:0070584	mitochondrion morphogenesis	1	258	29	21206	0.298984	0.370763	2.83427	0.524352
GO:0048873	homeostasis of number of cells within a tissue	1	258	29	21206	0.298984	0.370763	2.83427	0.524352
GO:0043200	response to amino acid	1	258	29	21206	0.298984	0.370763	2.83427	0.524352
GO:0042113	B cell activation	1	258	29	21206	0.298984	0.370763	2.83427	0.524352
GO:0032147	activation of protein kinase activity	1	258	29	21206	0.298984	0.370763	2.83427	0.524352
GO:0000165	MAPK cascade	2	258	91	21206	0.303895	0.376497	1.80646	0.517276
GO:2001244	positive regulation of intrinsic apoptotic signaling pathway	1	258	30	21206	0.307524	0.377077	2.73979	0.51212
GO:0031663	lipopolysaccharide-mediated signaling pathway	1	258	30	21206	0.307524	0.377077	2.73979	0.51212
GO:0061025	membrane fusion	1	258	30	21206	0.307524	0.377077	2.73979	0.51212
GO:0070509	calcium ion import	1	258	30	21206	0.307524	0.377077	2.73979	0.51212
GO:0001975	response to amphetamine	1	258	30	21206	0.307524	0.377077	2.73979	0.51212
GO:0048663	neuron fate commitment	1	258	30	21206	0.307524	0.377077	2.73979	0.51212
GO:0010043	response to zinc ion	1	258	30	21206	0.307524	0.377077	2.73979	0.51212
GO:0016575	histone deacetylation	1	258	30	21206	0.307524	0.377077	2.73979	0.51212
GO:0086010	membrane depolarization during action potential	1	258	30	21206	0.307524	0.377077	2.73979	0.51212
GO:0048709	oligodendrocyte differentiation	1	258	30	21206	0.307524	0.377077	2.73979	0.51212
GO:0014911	positive regulation of smooth muscle cell migration	1	258	30	21206	0.307524	0.377077	2.73979	0.51212
GO:0030336	negative regulation of cell migration	2	258	92	21206	0.308382	0.377775	1.78682	0.510911
GO:0060349	bone morphogenesis	1	258	31	21206	0.315961	0.384547	2.65141	0.500366
GO:0048477	oogenesis	1	258	31	21206	0.315961	0.384547	2.65141	0.500366
GO:0030534	adult behavior	1	258	31	21206	0.315961	0.384547	2.65141	0.500366
GO:0046854	phosphatidylinositol phosphorylation	1	258	31	21206	0.315961	0.384547	2.65141	0.500366
GO:0032467	positive regulation of cytokinesis	1	258	31	21206	0.315961	0.384547	2.65141	0.500366
GO:0032570	response to progesterone	1	258	31	21206	0.315961	0.384547	2.65141	0.500366
GO:0060412	ventricular septum morphogenesis	1	258	31	21206	0.315961	0.384547	2.65141	0.500366
GO:2001240	negative regulation of extrinsic apoptotic signaling pathway in absence of ligand	1	258	32	21206	0.324296	0.393231	2.56856	0.489059
GO:0008333	endosome to lysosome transport	1	258	32	21206	0.324296	0.393231	2.56856	0.489059
GO:0031069	hair follicle morphogenesis	1	258	32	21206	0.324296	0.393231	2.56856	0.489059
GO:0050808	synapse organization	1	258	32	21206	0.324296	0.393231	2.56856	0.489059
GO:0051281	positive regulation of release of sequestered calcium ion into cytosol	1	258	33	21206	0.332529	0.399888	2.49072	0.47817
GO:0030513	positive regulation of BMP signaling pathway	1	258	33	21206	0.332529	0.399888	2.49072	0.47817
GO:0007346	regulation of mitotic cell cycle	1	258	33	21206	0.332529	0.399888	2.49072	0.47817
GO:0045776	negative regulation of blood pressure	1	258	33	21206	0.332529	0.399888	2.49072	0.47817
GO:0046676	negative regulation of insulin secretion	1	258	33	21206	0.332529	0.399888	2.49072	0.47817
GO:0045595	regulation of cell differentiation	1	258	33	21206	0.332529	0.399888	2.49072	0.47817
GO:0007205	protein kinase C-activating G-protein coupled receptor signaling pathway	1	258	33	21206	0.332529	0.399888	2.49072	0.47817
GO:0009306	protein secretion	1	258	33	21206	0.332529	0.399888	2.49072	0.47817
GO:0010332	response to gamma radiation	1	258	33	21206	0.332529	0.399888	2.49072	0.47817
GO:0009791	post-embryonic development	2	258	98	21206	0.335164	0.40232	1.67742	0.474742
GO:0001889	liver development	2	258	98	21206	0.335164	0.40232	1.67742	0.474742
GO:0035335	peptidyl-tyrosine dephosphorylation	2	258	99	21206	0.339601	0.404845	1.66048	0.469031
GO:0048013	ephrin receptor signaling pathway	1	258	34	21206	0.340662	0.404845	2.41746	0.467676
GO:0019228	neuronal action potential	1	258	34	21206	0.340662	0.404845	2.41746	0.467676
GO:0031397	negative regulation of protein ubiquitination	1	258	34	21206	0.340662	0.404845	2.41746	0.467676
GO:0034644	cellular response to UV	1	258	34	21206	0.340662	0.404845	2.41746	0.467676
GO:0030282	bone mineralization	1	258	34	21206	0.340662	0.404845	2.41746	0.467676
GO:0035115	embryonic forelimb morphogenesis	1	258	34	21206	0.340662	0.404845	2.41746	0.467676
GO:0050873	brown fat cell differentiation	1	258	34	21206	0.340662	0.404845	2.41746	0.467676
GO:0043507	positive regulation of JUN kinase activity	1	258	34	21206	0.340662	0.404845	2.41746	0.467676
GO:0017157	regulation of exocytosis	1	258	34	21206	0.340662	0.404845	2.41746	0.467676
GO:0001654	eye development	1	258	34	21206	0.340662	0.404845	2.41746	0.467676
GO:0009887	organ morphogenesis	2	258	101	21206	0.348445	0.410674	1.6276	0.457865
GO:0051091	positive regulation of sequence-specific DNA binding transcription factor activity	2	258	101	21206	0.348445	0.410674	1.6276	0.457865
GO:0051603	proteolysis involved in cellular protein catabolic process	1	258	35	21206	0.348697	0.410674	2.34839	0.457552
GO:0043124	negative regulation of I-kappaB kinase/NF-kappaB signaling	1	258	35	21206	0.348697	0.410674	2.34839	0.457552
GO:0030073	insulin secretion	1	258	35	21206	0.348697	0.410674	2.34839	0.457552
GO:0006096	glycolytic process	1	258	35	21206	0.348697	0.410674	2.34839	0.457552
GO:0007188	adenylate cyclase-modulating G-protein coupled receptor signaling pathway	1	258	35	21206	0.348697	0.410674	2.34839	0.457552
GO:0007162	negative regulation of cell adhesion	1	258	35	21206	0.348697	0.410674	2.34839	0.457552
GO:0051924	regulation of calcium ion transport	1	258	35	21206	0.348697	0.410674	2.34839	0.457552
GO:0006904	vesicle docking involved in exocytosis	1	258	35	21206	0.348697	0.410674	2.34839	0.457552
GO:0042981	regulation of apoptotic process	3	258	173	21206	0.351932	0.414112	1.42533	0.453541
GO:0000278	mitotic cell cycle	1	258	36	21206	0.356634	0.417027	2.28316	0.447777
GO:0006635	fatty acid beta-oxidation	1	258	36	21206	0.356634	0.417027	2.28316	0.447777
GO:0032956	regulation of actin cytoskeleton organization	1	258	36	21206	0.356634	0.417027	2.28316	0.447777
GO:0001944	vasculature development	1	258	36	21206	0.356634	0.417027	2.28316	0.447777
GO:0043491	protein kinase B signaling	1	258	36	21206	0.356634	0.417027	2.28316	0.447777
GO:0048754	branching morphogenesis of an epithelial tube	1	258	36	21206	0.356634	0.417027	2.28316	0.447777
GO:0001662	behavioral fear response	1	258	36	21206	0.356634	0.417027	2.28316	0.447777
GO:0030968	endoplasmic reticulum unfolded protein response	1	258	37	21206	0.364475	0.424304	2.22145	0.438332
GO:0038032	termination of G-protein coupled receptor signaling pathway	1	258	37	21206	0.364475	0.424304	2.22145	0.438332
GO:0007265	Ras protein signal transduction	1	258	37	21206	0.364475	0.424304	2.22145	0.438332
GO:0014823	response to activity	1	258	37	21206	0.364475	0.424304	2.22145	0.438332
GO:0051930	regulation of sensory perception of pain	1	258	37	21206	0.364475	0.424304	2.22145	0.438332
GO:0045471	response to ethanol	2	258	106	21206	0.370376	0.428756	1.55083	0.431357
GO:0071277	cellular response to calcium ion	1	258	38	21206	0.37222	0.428756	2.16299	0.4292
GO:0050766	positive regulation of phagocytosis	1	258	38	21206	0.37222	0.428756	2.16299	0.4292
GO:0021549	cerebellum development	1	258	38	21206	0.37222	0.428756	2.16299	0.4292
GO:0000413	protein peptidyl-prolyl isomerization	1	258	38	21206	0.37222	0.428756	2.16299	0.4292
GO:0007281	germ cell development	1	258	38	21206	0.37222	0.428756	2.16299	0.4292
GO:0048167	regulation of synaptic plasticity	1	258	38	21206	0.37222	0.428756	2.16299	0.4292
GO:0030217	T cell differentiation	1	258	38	21206	0.37222	0.428756	2.16299	0.4292
GO:0043473	pigmentation	1	258	38	21206	0.37222	0.428756	2.16299	0.4292
GO:0045429	positive regulation of nitric oxide biosynthetic process	1	258	38	21206	0.37222	0.428756	2.16299	0.4292
GO:0045859	regulation of protein kinase activity	1	258	38	21206	0.37222	0.428756	2.16299	0.4292
GO:0042594	response to starvation	1	258	38	21206	0.37222	0.428756	2.16299	0.4292
GO:0050790	regulation of catalytic activity	2	258	107	21206	0.374728	0.430888	1.53633	0.426283
GO:0006869	lipid transport	2	258	107	21206	0.374728	0.430888	1.53633	0.426283
GO:0051496	positive regulation of stress fiber assembly	1	258	39	21206	0.379872	0.434518	2.10753	0.420363
GO:0010942	positive regulation of cell death	1	258	39	21206	0.379872	0.434518	2.10753	0.420363
GO:0097192	extrinsic apoptotic signaling pathway in absence of ligand	1	258	39	21206	0.379872	0.434518	2.10753	0.420363
GO:0010811	positive regulation of cell-substrate adhesion	1	258	39	21206	0.379872	0.434518	2.10753	0.420363
GO:0030890	positive regulation of B cell proliferation	1	258	39	21206	0.379872	0.434518	2.10753	0.420363
GO:0030199	collagen fibril organization	1	258	39	21206	0.379872	0.434518	2.10753	0.420363
GO:0034446	substrate adhesion-dependent cell spreading	1	258	40	21206	0.387431	0.441624	2.05484	0.411806
GO:0045599	negative regulation of fat cell differentiation	1	258	40	21206	0.387431	0.441624	2.05484	0.411806
GO:0008543	fibroblast growth factor receptor signaling pathway	1	258	40	21206	0.387431	0.441624	2.05484	0.411806
GO:0038083	peptidyl-tyrosine autophosphorylation	1	258	40	21206	0.387431	0.441624	2.05484	0.411806
GO:0051402	neuron apoptotic process	1	258	41	21206	0.394897	0.447028	2.00473	0.403516
GO:0009967	positive regulation of signal transduction	1	258	41	21206	0.394897	0.447028	2.00473	0.403516
GO:0097191	extrinsic apoptotic signaling pathway	1	258	41	21206	0.394897	0.447028	2.00473	0.403516
GO:0032313	regulation of Rab GTPase activity	1	258	41	21206	0.394897	0.447028	2.00473	0.403516
GO:0030593	neutrophil chemotaxis	1	258	41	21206	0.394897	0.447028	2.00473	0.403516
GO:1901998	toxin transport	1	258	41	21206	0.394897	0.447028	2.00473	0.403516
GO:0055072	iron ion homeostasis	1	258	41	21206	0.394897	0.447028	2.00473	0.403516
GO:0001656	metanephros development	1	258	41	21206	0.394897	0.447028	2.00473	0.403516
GO:0006865	amino acid transport	1	258	43	21206	0.40956	0.461635	1.91148	0.387682
GO:0048469	cell maturation	1	258	43	21206	0.40956	0.461635	1.91148	0.387682
GO:0022008	neurogenesis	1	258	43	21206	0.40956	0.461635	1.91148	0.387682
GO:0050729	positive regulation of inflammatory response	1	258	43	21206	0.40956	0.461635	1.91148	0.387682
GO:0010862	positive regulation of pathway-restricted SMAD protein phosphorylation	1	258	43	21206	0.40956	0.461635	1.91148	0.387682
GO:0031667	response to nutrient levels	1	258	44	21206	0.416758	0.467739	1.86804	0.380116
GO:0045740	positive regulation of DNA replication	1	258	44	21206	0.416758	0.467739	1.86804	0.380116
GO:0070936	protein K48-linked ubiquitination	1	258	44	21206	0.416758	0.467739	1.86804	0.380116
GO:0021915	neural tube development	1	258	44	21206	0.416758	0.467739	1.86804	0.380116
GO:0071347	cellular response to interleukin-1	1	258	44	21206	0.416758	0.467739	1.86804	0.380116
GO:0001822	kidney development	2	258	118	21206	0.421721	0.472904	1.39312	0.374975
GO:0045597	positive regulation of cell differentiation	1	258	45	21206	0.423869	0.474502	1.82653	0.372768
GO:0030819	positive regulation of cAMP biosynthetic process	1	258	45	21206	0.423869	0.474502	1.82653	0.372768
GO:0042593	glucose homeostasis	2	258	120	21206	0.430074	0.481038	1.3699	0.366457
GO:0009411	response to UV	1	258	46	21206	0.430893	0.481134	1.78682	0.36563
GO:0048538	thymus development	1	258	46	21206	0.430893	0.481134	1.78682	0.36563
GO:0003333	amino acid transmembrane transport	1	258	47	21206	0.437832	0.487223	1.7488	0.358692
GO:0070301	cellular response to hydrogen peroxide	1	258	47	21206	0.437832	0.487223	1.7488	0.358692
GO:0007599	hemostasis	1	258	47	21206	0.437832	0.487223	1.7488	0.358692
GO:0001890	placenta development	1	258	47	21206	0.437832	0.487223	1.7488	0.358692
GO:0006935	chemotaxis	2	258	123	21206	0.442483	0.49193	1.33648	0.354103
GO:0016049	cell growth	1	258	48	21206	0.444687	0.49193	1.71237	0.351946
GO:0001942	hair follicle development	1	258	48	21206	0.444687	0.49193	1.71237	0.351946
GO:0032436	positive regulation of proteasomal ubiquitin-dependent protein catabolic process	1	258	48	21206	0.444687	0.49193	1.71237	0.351946
GO:0001932	regulation of protein phosphorylation	1	258	48	21206	0.444687	0.49193	1.71237	0.351946
GO:0009267	cellular response to starvation	1	258	48	21206	0.444687	0.49193	1.71237	0.351946
GO:0009566	fertilization	1	258	48	21206	0.444687	0.49193	1.71237	0.351946
GO:0060348	bone development	1	258	49	21206	0.451458	0.498161	1.67742	0.345382
GO:0009953	dorsal/ventral pattern formation	1	258	49	21206	0.451458	0.498161	1.67742	0.345382
GO:0048387	negative regulation of retinoic acid receptor signaling pathway	1	258	49	21206	0.451458	0.498161	1.67742	0.345382
GO:0007283	spermatogenesis	5	258	363	21206	0.453115	0.499568	1.13215	0.343792
GO:0016567	protein ubiquitination	6	258	444	21206	0.45533	0.501589	1.11073	0.341674
GO:0010212	response to ionizing radiation	1	258	50	21206	0.458148	0.503425	1.64388	0.338995
GO:0048666	neuron development	1	258	50	21206	0.458148	0.503425	1.64388	0.338995
GO:0071560	cellular response to transforming growth factor beta stimulus	1	258	50	21206	0.458148	0.503425	1.64388	0.338995
GO:0006814	sodium ion transport	2	258	127	21206	0.458794	0.503714	1.29439	0.338382
GO:0045727	positive regulation of translation	1	258	51	21206	0.464756	0.509406	1.61164	0.332775
GO:0048146	positive regulation of fibroblast proliferation	1	258	51	21206	0.464756	0.509406	1.61164	0.332775
GO:0016055	Wnt signaling pathway	3	258	208	21206	0.465496	0.509792	1.18549	0.332084
GO:0007605	sensory perception of sound	2	258	130	21206	0.470845	0.514412	1.26452	0.327122
GO:0009408	response to heat	1	258	52	21206	0.471283	0.514412	1.58065	0.326718
GO:0001541	ovarian follicle development	1	258	52	21206	0.471283	0.514412	1.58065	0.326718
GO:0009611	response to wounding	1	258	52	21206	0.471283	0.514412	1.58065	0.326718
GO:0016311	dephosphorylation	3	258	210	21206	0.47175	0.514494	1.1742	0.326288
GO:0006979	response to oxidative stress	2	258	131	21206	0.474826	0.517419	1.25487	0.323465
GO:0014068	positive regulation of phosphatidylinositol 3-kinase signaling	1	258	53	21206	0.477732	0.519721	1.55083	0.320816
GO:0045732	positive regulation of protein catabolic process	1	258	53	21206	0.477732	0.519721	1.55083	0.320816
GO:0006629	lipid metabolic process	6	258	457	21206	0.482948	0.524961	1.07913	0.3161
GO:0007005	mitochondrion organization	1	258	54	21206	0.484102	0.525779	1.52211	0.315063
GO:0034613	cellular protein localization	1	258	55	21206	0.490394	0.531045	1.49443	0.309455
GO:0042632	cholesterol homeostasis	1	258	55	21206	0.490394	0.531045	1.49443	0.309455
GO:0048704	embryonic skeletal system morphogenesis	1	258	55	21206	0.490394	0.531045	1.49443	0.309455
GO:0006470	protein dephosphorylation	2	258	135	21206	0.490569	0.531045	1.21769	0.3093
GO:0043161	proteasome-mediated ubiquitin-dependent protein catabolic process	2	258	136	21206	0.494458	0.534813	1.20873	0.305871
GO:0008630	intrinsic apoptotic signaling pathway in response to DNA damage	1	258	56	21206	0.496611	0.536258	1.46775	0.303984
GO:0030317	sperm motility	1	258	56	21206	0.496611	0.536258	1.46775	0.303984
GO:0018108	peptidyl-tyrosine phosphorylation	2	258	138	21206	0.50218	0.541826	1.19121	0.299141
GO:0042552	myelination	1	258	57	21206	0.502751	0.541996	1.442	0.298647
GO:0006888	ER to Golgi vesicle-mediated transport	1	258	58	21206	0.508817	0.546291	1.41713	0.293438
GO:0032526	response to retinoic acid	1	258	58	21206	0.508817	0.546291	1.41713	0.293438
GO:0003007	heart morphogenesis	1	258	58	21206	0.508817	0.546291	1.41713	0.293438
GO:0032880	regulation of protein localization	1	258	58	21206	0.508817	0.546291	1.41713	0.293438
GO:0051591	response to cAMP	1	258	58	21206	0.508817	0.546291	1.41713	0.293438
GO:0008654	phospholipid biosynthetic process	1	258	59	21206	0.514809	0.551822	1.39312	0.288353
GO:0016525	negative regulation of angiogenesis	1	258	59	21206	0.514809	0.551822	1.39312	0.288353
GO:0035690	cellular response to drug	1	258	60	21206	0.520729	0.557711	1.3699	0.283388
GO:0006006	glucose metabolic process	1	258	61	21206	0.526576	0.561682	1.34744	0.278539
GO:0017148	negative regulation of translation	1	258	61	21206	0.526576	0.561682	1.34744	0.278539
GO:0008344	adult locomotory behavior	1	258	61	21206	0.526576	0.561682	1.34744	0.278539
GO:0001938	positive regulation of endothelial cell proliferation	1	258	61	21206	0.526576	0.561682	1.34744	0.278539
GO:0042475	odontogenesis of dentin-containing tooth	1	258	61	21206	0.526576	0.561682	1.34744	0.278539
GO:0030326	embryonic limb morphogenesis	1	258	62	21206	0.532353	0.566462	1.32571	0.2738
GO:0031100	organ regeneration	1	258	62	21206	0.532353	0.566462	1.32571	0.2738
GO:0045444	fat cell differentiation	1	258	62	21206	0.532353	0.566462	1.32571	0.2738
GO:0045087	innate immune response	4	258	316	21206	0.537914	0.571144	1.04043	0.269287
GO:0007517	muscle organ development	1	258	63	21206	0.538059	0.571144	1.30466	0.26917
GO:0046330	positive regulation of JNK cascade	1	258	63	21206	0.538059	0.571144	1.30466	0.26917
GO:0006511	ubiquitin-dependent protein catabolic process	2	258	149	21206	0.54327	0.576209	1.10327	0.264984
GO:0045165	cell fate commitment	1	258	65	21206	0.549264	0.581626	1.26452	0.260219
GO:0006805	xenobiotic metabolic process	1	258	65	21206	0.549264	0.581626	1.26452	0.260219
GO:0009612	response to mechanical stimulus	1	258	66	21206	0.554765	0.586977	1.24536	0.255891
GO:0006486	protein glycosylation	2	258	153	21206	0.557619	0.589521	1.07443	0.253663
GO:0048661	positive regulation of smooth muscle cell proliferation	1	258	67	21206	0.560199	0.591772	1.22677	0.251658
GO:0072659	protein localization to plasma membrane	1	258	68	21206	0.565567	0.596962	1.20873	0.247516
GO:0060395	SMAD protein signal transduction	1	258	69	21206	0.570869	0.602074	1.19121	0.243463
GO:0030855	epithelial cell differentiation	1	258	70	21206	0.576107	0.606137	1.1742	0.239497
GO:1903506	regulation of nucleic acid-templated transcription	1	258	70	21206	0.576107	0.606137	1.1742	0.239497
GO:0030183	B cell differentiation	1	258	70	21206	0.576107	0.606137	1.1742	0.239497
GO:0030335	positive regulation of cell migration	2	258	159	21206	0.578537	0.608205	1.03388	0.237669
GO:0008544	epidermis development	1	258	71	21206	0.581281	0.610602	1.15766	0.235614
GO:0019233	sensory perception of pain	1	258	72	21206	0.586393	0.615478	1.14158	0.231811
GO:0043627	response to estrogen	1	258	74	21206	0.59643	0.624514	1.11073	0.224441
GO:0000902	cell morphogenesis	1	258	74	21206	0.59643	0.624514	1.11073	0.224441
GO:0050728	negative regulation of inflammatory response	1	258	74	21206	0.59643	0.624514	1.11073	0.224441
GO:0007015	actin filament organization	1	258	75	21206	0.601357	0.628169	1.09592	0.220868
GO:0043154	negative regulation of cysteine-type endopeptidase activity involved in apoptotic process	1	258	75	21206	0.601357	0.628169	1.09592	0.220868
GO:0006919	activation of cysteine-type endopeptidase activity involved in apoptotic process	1	258	75	21206	0.601357	0.628169	1.09592	0.220868
GO:0006200	ATP catabolic process	3	258	257	21206	0.607546	0.634129	0.959461	0.216421
GO:0006469	negative regulation of protein kinase activity	1	258	77	21206	0.611032	0.636755	1.06745	0.213936
GO:0000187	activation of MAPK activity	1	258	77	21206	0.611032	0.636755	1.06745	0.213936
GO:0006886	intracellular protein transport	3	258	260	21206	0.615393	0.639672	0.94839	0.210848
GO:0007565	female pregnancy	1	258	78	21206	0.615782	0.639672	1.05377	0.210573
GO:0007059	chromosome segregation	1	258	78	21206	0.615782	0.639672	1.05377	0.210573
GO:0060041	retina development in camera-type eye	1	258	78	21206	0.615782	0.639672	1.05377	0.210573
GO:0030509	BMP signaling pathway	1	258	79	21206	0.620474	0.644036	1.04043	0.207277
GO:0045596	negative regulation of cell differentiation	1	258	80	21206	0.625109	0.647822	1.02742	0.204045
GO:0008202	steroid metabolic process	1	258	80	21206	0.625109	0.647822	1.02742	0.204045
GO:0007584	response to nutrient	1	258	81	21206	0.629687	0.652051	1.01474	0.200875
GO:0006338	chromatin remodeling	1	258	82	21206	0.634209	0.656217	1.00236	0.197767
GO:0016568	chromatin modification	3	258	269	21206	0.638296	0.658244	0.916659	0.194978
GO:0009636	response to toxic substance	1	258	83	21206	0.638677	0.658244	0.990287	0.194719
GO:0051321	meiotic cell cycle	1	258	83	21206	0.638677	0.658244	0.990287	0.194719
GO:0007389	pattern specification process	1	258	83	21206	0.638677	0.658244	0.990287	0.194719
GO:0008203	cholesterol metabolic process	1	258	83	21206	0.638677	0.658244	0.990287	0.194719
GO:0071222	cellular response to lipopolysaccharide	2	258	181	21206	0.648984	0.668341	0.908219	0.187766
GO:0001843	neural tube closure	1	258	86	21206	0.651756	0.670347	0.955742	0.185915
GO:0010629	negative regulation of gene expression	2	258	182	21206	0.651954	0.670347	0.903229	0.185783
GO:0051897	positive regulation of protein kinase B signaling	1	258	87	21206	0.656011	0.673463	0.944756	0.183089
GO:0007050	cell cycle arrest	1	258	87	21206	0.656011	0.673463	0.944756	0.183089
GO:0006874	cellular calcium ion homeostasis	1	258	88	21206	0.660213	0.677247	0.93402	0.180316
GO:0007229	integrin-mediated signaling pathway	1	258	93	21206	0.68047	0.697482	0.883804	0.167191
GO:0030198	extracellular matrix organization	1	258	95	21206	0.688232	0.704887	0.865198	0.162265
GO:0008584	male gonad development	1	258	98	21206	0.699523	0.715893	0.838712	0.155198
GO:0035264	multicellular organism growth	1	258	99	21206	0.703196	0.718531	0.83024	0.152924
GO:0007169	transmembrane receptor protein tyrosine kinase signaling pathway	1	258	99	21206	0.703196	0.718531	0.83024	0.152924
GO:0006974	cellular response to DNA damage stimulus	4	258	392	21206	0.705261	0.72008	0.838712	0.15165
GO:0035725	sodium ion transmembrane transport	1	258	100	21206	0.706824	0.721114	0.821938	0.150689
GO:0009790	embryo development	1	258	107	21206	0.731012	0.744634	0.768166	0.136075
GO:0001649	osteoblast differentiation	1	258	107	21206	0.731012	0.744634	0.768166	0.136075
GO:0009952	anterior/posterior pattern specification	1	258	110	21206	0.74076	0.753978	0.747216	0.130322
GO:0016192	vesicle-mediated transport	2	258	216	21206	0.741427	0.754071	0.761054	0.129932
GO:0007166	cell surface receptor signaling pathway	1	258	111	21206	0.743931	0.756032	0.740485	0.128467
GO:0007204	positive regulation of cytosolic calcium ion concentration	1	258	118	21206	0.765068	0.776911	0.696558	0.1163
GO:0006260	DNA replication	1	258	121	21206	0.773586	0.784954	0.679288	0.111491
GO:0071230	cellular response to amino acid stimulus	1	258	126	21206	0.787105	0.798054	0.652332	0.103967
GO:0098655	cation transmembrane transport	1	258	131	21206	0.799819	0.810319	0.627434	0.0970081
GO:0002376	immune system process	3	258	354	21206	0.807683	0.817654	0.696558	0.0927591
GO:0043123	positive regulation of I-kappaB kinase/NF-kappaB signaling	1	258	145	21206	0.831536	0.841153	0.566854	0.0801189
GO:0019221	cytokine-mediated signaling pathway	1	258	149	21206	0.839641	0.848697	0.551636	0.0759063
GO:0007049	cell cycle	5	258	605	21206	0.862782	0.871417	0.679288	0.0640988
GO:0015031	protein transport	5	258	606	21206	0.863721	0.871694	0.678167	0.0636265
GO:0005975	carbohydrate metabolic process	1	258	211	21206	0.925414	0.933238	0.389544	0.033664
GO:0051301	cell division	2	258	357	21206	0.9333	0.940468	0.460469	0.0299787
GO:0055114	oxidation-reduction process	5	258	762	21206	0.957147	0.963759	0.539329	0.0190212
GO:0006955	immune response	1	258	263	21206	0.960819	0.966458	0.312524	0.0173585
GO:0007067	mitotic nuclear division	1	258	264	21206	0.961301	0.966458	0.31134	0.0171404
GO:0006281	DNA repair	1	258	305	21206	0.976732	0.98122	0.269488	0.0102245
GO:0007165	signal transduction	18	258	2388	21206	0.992279	0.996075	0.619551	0.00336606
GO:0008152	metabolic process	9	258	1512	21206	0.995764	0.998809	0.489249	0.0018436
GO:0006508	proteolysis	2	258	662	21206	0.997498	0.999784	0.24832	0.00108804
GO:0007186	G-protein coupled receptor signaling pathway	6	258	1974	21206	0.999999	1	0.249829	5.64624e-07
GO:0050896	response to stimulus	1	258	1223	21206	1	1	0.0672067	8.68861e-08
GO:0008150	biological_process	46	258	6679	21206	1	1	0.56609	8.58887e-08
