# Supplementary material for: Cognitive impairment and transcriptomic profile in hippocampus of young mice after multiple neonatal exposures to sevoflurane
Source: Aging (Albany NY). 2019 Oct 3;11(19):8386–417. doi: 10.18632/aging.102326 (PMC6814607; doi:10.18632/aging.102326)
Supplement: Supplementary Table 6 [file aging-11-102326-s004.xlsx]

## Sheet: UpGO_Result
Supplementary Table 6. All GO terms of cellular component associated with up-regulated DEGs.
GOID	GOTerm	DifGene	AllDifGene	GeneInGO	AllGene	P-Value	FDR	Enrichment	(-log10P)
GO:0005581	collagen trimer	3	47	87	21052	0.000969302	0.0668818	15.4453	3.01354
GO:0070195	growth hormone receptor complex	1	47	1	21052	0.00223257	0.0768554	447.915	2.6512
GO:0048269	methionine adenosyltransferase complex	1	47	2	21052	0.00446026	0.0768554	223.957	2.35064
GO:0005578	proteinaceous extracellular matrix	4	47	301	21052	0.0045067	0.0768554	5.95236	2.34614
GO:0097543	ciliary inversin compartment	1	47	3	21052	0.00668308	0.0768554	149.305	2.17502
GO:0016035	zeta DNA polymerase complex	1	47	3	21052	0.00668308	0.0768554	149.305	2.17502
GO:0042382	paraspeckles	1	47	7	21052	0.0155259	0.135888	63.9878	1.80894
GO:0031012	extracellular matrix	3	47	240	21052	0.0164113	0.135888	5.59894	1.78486
GO:0032584	growth cone membrane	1	47	8	21052	0.0177245	0.135888	55.9894	1.75143
GO:0000788	nuclear nucleosome	1	47	9	21052	0.0199183	0.137437	49.7683	1.70075
GO:0001527	microfibril	1	47	11	21052	0.0242916	0.152043	40.7195	1.61454
GO:0005916	fascia adherens	1	47	13	21052	0.0286458	0.152043	34.455	1.54294
GO:0097038	perinuclear endoplasmic reticulum	1	47	13	21052	0.0286458	0.152043	34.455	1.54294
GO:0097546	ciliary base	1	47	15	21052	0.032981	0.162549	29.861	1.48174
GO:0043292	contractile fiber	1	47	19	21052	0.0415946	0.186191	23.5745	1.38096
GO:0005773	vacuole	1	47	21	21052	0.0458732	0.186191	21.3293	1.33844
GO:0035327	transcriptionally active chromatin	1	47	21	21052	0.0458732	0.186191	21.3293	1.33844
GO:0030057	desmosome	1	47	25	21052	0.0543743	0.20216	17.9166	1.26461
GO:0005615	extracellular space	6	47	1239	21052	0.056244	0.20216	2.16908	1.24992
GO:0001533	cornified envelope	1	47	27	21052	0.0585971	0.20216	16.5894	1.23212
GO:0005719	nuclear euchromatin	1	47	29	21052	0.0628014	0.206347	15.4453	1.20203
GO:0005622	intracellular	7	47	1643	21052	0.0706017	0.219695	1.90834	1.15118
GO:0008180	COP9 signalosome	1	47	34	21052	0.0732318	0.219695	13.174	1.1353
GO:0005929	cilium	2	47	233	21052	0.0953836	0.269938	3.84476	1.02053
GO:0014704	intercalated disc	1	47	46	21052	0.0978036	0.269938	9.73728	1.00965
GO:0000228	nuclear chromosome	1	47	48	21052	0.101836	0.270258	9.33156	0.992097
GO:0072372	primary cilium	1	47	50	21052	0.105852	0.27051	8.9583	0.975302
GO:0030315	T-tubule	1	47	54	21052	0.113829	0.280508	8.29472	0.943746
GO:0005575	cellular_component	17	47	5822	21052	0.127598	0.303595	1.30789	0.894156
GO:0042995	cell projection	3	47	604	21052	0.151734	0.34148	2.22474	0.818917
GO:0000786	nucleosome	1	47	77	21052	0.158367	0.34148	5.81708	0.800334
GO:0044297	cell body	1	47	77	21052	0.158367	0.34148	5.81708	0.800334
GO:0005623	cell	3	47	631	21052	0.166228	0.344766	2.12955	0.779297
GO:0019898	extrinsic component of membrane	1	47	84	21052	0.171482	0.344766	5.33232	0.765781
GO:0005694	chromosome	2	47	343	21052	0.178161	0.344766	2.61175	0.749187
GO:0005576	extracellular region	6	47	1736	21052	0.188001	0.344766	1.54809	0.725839
GO:0001669	acrosomal vesicle	1	47	94	21052	0.189871	0.344766	4.76505	0.721541
GO:0005604	basement membrane	1	47	94	21052	0.189871	0.344766	4.76505	0.721541
GO:0008021	synaptic vesicle	1	47	122	21052	0.239261	0.415433	3.67143	0.621128
GO:0005777	peroxisome	1	47	126	21052	0.246072	0.415433	3.55488	0.608938
GO:0043025	neuronal cell body	2	47	427	21052	0.246852	0.415433	2.09796	0.607564
GO:0043235	receptor complex	1	47	132	21052	0.256176	0.420861	3.39329	0.591461
GO:0005739	mitochondrion	5	47	1611	21052	0.289575	0.458072	1.39018	0.538239
GO:0005882	intermediate filament	1	47	154	21052	0.292104	0.458072	2.90854	0.534463
GO:0005829	cytosol	5	47	1640	21052	0.302438	0.463738	1.36559	0.519364
GO:0005911	cell-cell junction	1	47	171	21052	0.318698	0.478046	2.61939	0.496621
GO:0016323	basolateral plasma membrane	1	47	184	21052	0.338372	0.496759	2.43432	0.470606
GO:0043234	protein complex	2	47	569	21052	0.36404	0.515571	1.57439	0.438851
GO:0031965	nuclear membrane	1	47	203	21052	0.36613	0.515571	2.20648	0.436365
GO:0045121	membrane raft	1	47	224	21052	0.395484	0.545768	1.99962	0.402871
GO:0005634	nucleus	14	47	5813	21052	0.423098	0.572426	1.07876	0.373559
GO:0005887	integral component of plasma membrane	2	47	676	21052	0.448205	0.594733	1.32519	0.348523
GO:0016324	apical plasma membrane	1	47	294	21052	0.484042	0.619105	1.52352	0.315117
GO:0005794	Golgi apparatus	3	47	1162	21052	0.484517	0.619105	1.15641	0.314691
GO:0030424	axon	1	47	305	21052	0.496751	0.623196	1.46857	0.303861
GO:0070062	extracellular vesicular exosome	6	47	2646	21052	0.549485	0.667947	1.01568	0.260044
GO:0043005	neuron projection	1	47	356	21052	0.551782	0.667947	1.25819	0.258233
GO:0005730	nucleolus	2	47	843	21052	0.566572	0.674025	1.06267	0.246745
GO:0005813	centrosome	1	47	392	21052	0.587035	0.686533	1.14264	0.231336
GO:0005856	cytoskeleton	2	47	1055	21052	0.689811	0.793283	0.849128	0.16127
GO:0009986	cell surface	1	47	552	21052	0.713554	0.807135	0.81144	0.146573
GO:0048471	perinuclear region of cytoplasm	1	47	613	21052	0.751031	0.835825	0.730693	0.124342
GO:0005783	endoplasmic reticulum	2	47	1229	21052	0.768712	0.841922	0.72891	0.114236
GO:0030054	cell junction	1	47	677	21052	0.785188	0.846531	0.661617	0.105026
GO:0005886	plasma membrane	8	47	4542	21052	0.824825	0.863308	0.78893	0.083638
GO:0005654	nucleoplasm	3	47	1959	21052	0.825773	0.863308	0.685934	0.0831392
GO:0005737	cytoplasm	11	47	6109	21052	0.843993	0.869187	0.806525	0.0736612
GO:0016021	integral component of membrane	9	47	5906	21052	0.941023	0.954861	0.682566	0.0263999
GO:0016020	membrane	11	47	8219	21052	0.992373	0.992373	0.599472	0.00332517
