# Supplementary material for: Cognitive impairment and transcriptomic profile in hippocampus of young mice after multiple neonatal exposures to sevoflurane
Source: Aging (Albany NY). 2019 Oct 3;11(19):8386–417. doi: 10.18632/aging.102326 (PMC6814607; doi:10.18632/aging.102326)
Supplement: Supplementary Table 7 [file aging-11-102326-s006.xlsx]

## Sheet: DownGO_Result
Supplementary Table 7. All GO terms of cellular component associated with down-regulated DEGs.
GOID	GOTerm	DifGene	AllDifGene	GeneInGO	AllGene	P-Value	FDR	Enrichment	(-log10P)
GO:0045202	synapse	28	263	444	21052	2.28459e-12	6.14553e-10	5.04792	11.6412
GO:0043025	neuronal cell body	23	263	427	21052	4.83881e-09	6.5082e-07	4.31159	8.31526
GO:0030425	dendrite	21	263	381	21052	1.558e-08	1.39701e-06	4.41196	7.80743
GO:0043005	neuron projection	20	263	356	21052	2.52905e-08	1.70078e-06	4.49695	7.59704
GO:0030054	cell junction	28	263	677	21052	3.19683e-08	1.71989e-06	3.3106	7.49528
GO:0034663	endoplasmic reticulum chaperone complex	5	263	11	21052	1.27296e-07	5.70709e-06	36.3844	6.89519
GO:0030424	axon	17	263	305	21052	3.24383e-07	1.24656e-05	4.46156	6.48894
GO:0005790	smooth endoplasmic reticulum	6	263	27	21052	8.52823e-07	2.86762e-05	17.7879	6.06914
GO:0045211	postsynaptic membrane	13	263	212	21052	2.85297e-06	8.5272e-05	4.90846	5.5447
GO:0043197	dendritic spine	10	263	127	21052	4.52965e-06	0.000121848	6.30281	5.34394
GO:0042995	cell projection	22	263	604	21052	7.96029e-06	0.000194665	2.91557	5.09907
GO:0005737	cytoplasm	109	263	6109	21052	9.99677e-06	0.000224094	1.42822	5.00014
GO:0008076	voltage-gated potassium channel complex	7	263	70	21052	2.68719e-05	0.000556042	8.00456	4.5707
GO:0005883	neurofilament	3	263	8	21052	0.000103058	0.00198018	30.0171	3.98692
GO:0030133	transport vesicle	6	263	63	21052	0.000134402	0.00241028	7.62339	3.87159
GO:0030426	growth cone	8	263	126	21052	0.000188183	0.00316382	5.08226	3.72542
GO:0005794	Golgi apparatus	29	263	1162	21052	0.000312307	0.0049418	1.9977	3.50542
GO:0005856	cytoskeleton	26	263	1055	21052	0.000774546	0.0111107	1.97269	3.11095
GO:0030673	axolemma	3	263	15	21052	0.000784772	0.0111107	16.0091	3.10526
GO:0030672	synaptic vesicle membrane	5	263	59	21052	0.000845946	0.011378	6.78353	3.07266
GO:0070032	synaptobrevin 2-SNAP-25-syntaxin-1a-complexin I complex	2	263	4	21052	0.000917564	0.0117536	40.0228	3.03736
GO:0043679	axon terminus	5	263	65	21052	0.00131357	0.0160613	6.15736	2.88155
GO:0030175	filopodium	5	263	66	21052	0.00140696	0.0164553	6.06406	2.85172
GO:0005783	endoplasmic reticulum	28	263	1229	21052	0.00159482	0.0173313	1.82366	2.79729
GO:0044295	axonal growth cone	3	263	19	21052	0.00161071	0.0173313	12.6388	2.79298
GO:0043195	terminal bouton	6	263	101	21052	0.00169083	0.0174936	4.75519	2.7719
GO:0005788	endoplasmic reticulum lumen	6	263	103	21052	0.00186868	0.0177009	4.66285	2.72847
GO:0032809	neuronal cell body membrane	3	263	20	21052	0.00187757	0.0177009	12.0068	2.7264
GO:0048471	perinuclear region of cytoplasm	17	263	613	21052	0.00190828	0.0177009	2.21986	2.71936
GO:0014731	spectrin-associated cytoskeleton	2	263	6	21052	0.00225624	0.0202309	26.6819	2.64662
GO:0032590	dendrite membrane	3	263	22	21052	0.00249007	0.0216074	10.9153	2.60379
GO:0016020	membrane	125	263	8219	21052	0.00296582	0.0249314	1.21739	2.52786
GO:0000407	pre-autophagosomal structure	3	263	24	21052	0.00321301	0.0261909	10.0057	2.49309
GO:0015629	actin cytoskeleton	8	263	196	21052	0.00332611	0.0263154	3.26717	2.47806
GO:0008021	synaptic vesicle	6	263	122	21052	0.00434446	0.0333903	3.93667	2.36206
GO:0030315	T-tubule	4	263	54	21052	0.00461419	0.0344783	5.92931	2.3359
GO:0032281	alpha-amino-3-hydroxy-5-methyl-4-isoxazolepropionic acid selective glutamate receptor complex	3	263	28	21052	0.00501299	0.0364458	8.57632	2.2999
GO:0030867	rough endoplasmic reticulum membrane	2	263	9	21052	0.00528246	0.0373943	17.7879	2.27716
GO:0005793	endoplasmic reticulum-Golgi intermediate compartment	4	263	58	21052	0.00595491	0.0407155	5.52039	2.22512
GO:0005623	cell	16	263	631	21052	0.00605435	0.0407155	2.02968	2.21793
GO:0016327	apicolateral plasma membrane	2	263	11	21052	0.00793857	0.0505675	14.5538	2.10026
GO:0042641	actomyosin	2	263	11	21052	0.00793857	0.0505675	14.5538	2.10026
GO:0042470	melanosome	5	263	99	21052	0.00808327	0.0505675	4.04271	2.09241
GO:0008328	ionotropic glutamate receptor complex	2	263	12	21052	0.00944825	0.0577632	13.3409	2.02465
GO:0005769	early endosome	7	263	191	21052	0.0103621	0.0619424	2.93361	1.98455
GO:0005634	nucleus	90	263	5813	21052	0.010639	0.0622152	1.23931	1.9731
GO:0005776	autophagic vacuole	3	263	38	21052	0.0117813	0.0650419	6.31939	1.92881
GO:0097144	BAX complex	1	263	1	21052	0.0124929	0.0650419	80.0456	1.90334
GO:0044301	climbing fiber	1	263	1	21052	0.0124929	0.0650419	80.0456	1.90334
GO:1990005	granular vesicle	1	263	1	21052	0.0124929	0.0650419	80.0456	1.90334
GO:1990032	parallel fiber	1	263	1	21052	0.0124929	0.0650419	80.0456	1.90334
GO:0043220	Schmidt-Lanterman incisure	2	263	14	21052	0.0128149	0.0650419	11.4351	1.89228
GO:0060077	inhibitory synapse	2	263	14	21052	0.0128149	0.0650419	11.4351	1.89228
GO:0005874	microtubule	9	263	302	21052	0.0140362	0.0699211	2.38547	1.85275
GO:0044798	nuclear transcription factor complex	2	263	15	21052	0.0146657	0.0717288	10.6728	1.8337
GO:0031410	cytoplasmic vesicle	13	263	526	21052	0.0154527	0.074228	1.97831	1.811
GO:0015630	microtubule cytoskeleton	6	263	162	21052	0.0163289	0.0770609	2.96465	1.78704
GO:0014704	intercalated disc	3	263	46	21052	0.0197133	0.0914287	5.22037	1.70524
GO:0000421	autophagic vacuole membrane	2	263	18	21052	0.0208519	0.0936065	8.89396	1.68085
GO:0005789	endoplasmic reticulum membrane	16	263	727	21052	0.0208788	0.0936065	1.76166	1.68029
GO:0071819	DUBm complex	1	263	2	21052	0.0248303	0.096802	40.0228	1.60502
GO:0031595	nuclear proteasome complex	1	263	2	21052	0.0248303	0.096802	40.0228	1.60502
GO:0005757	mitochondrial permeability transition pore complex	1	263	2	21052	0.0248303	0.096802	40.0228	1.60502
GO:0097632	extrinsic component of pre-autophagosomal structure membrane	1	263	2	21052	0.0248303	0.096802	40.0228	1.60502
GO:0097635	extrinsic component of autophagic vacuole membrane	1	263	2	21052	0.0248303	0.096802	40.0228	1.60502
GO:0072563	endothelial microparticle	1	263	2	21052	0.0248303	0.096802	40.0228	1.60502
GO:0014802	terminal cisterna	1	263	2	21052	0.0248303	0.096802	40.0228	1.60502
GO:0070436	Grb2-EGFR complex	1	263	2	21052	0.0248303	0.096802	40.0228	1.60502
GO:0031095	platelet dense tubular network membrane	1	263	2	21052	0.0248303	0.096802	40.0228	1.60502
GO:0043209	myelin sheath	6	263	182	21052	0.0270896	0.102915	2.63887	1.5672
GO:0005871	kinesin complex	3	263	52	21052	0.0271838	0.102915	4.61802	1.56569
GO:0005875	microtubule associated complex	2	263	21	21052	0.0279285	0.102915	7.62339	1.55395
GO:0097060	synaptic membrane	2	263	21	21052	0.0279285	0.102915	7.62339	1.55395
GO:0005886	plasma membrane	70	263	4542	21052	0.0293113	0.106551	1.23364	1.53296
GO:0005912	adherens junction	3	263	55	21052	0.0314087	0.112653	4.36613	1.50295
GO:0031594	neuromuscular junction	3	263	56	21052	0.0328891	0.114446	4.28816	1.48295
GO:0005891	voltage-gated calcium channel complex	2	263	23	21052	0.0331043	0.114446	6.96049	1.48012
GO:0000139	Golgi membrane	10	263	410	21052	0.0340177	0.114446	1.95233	1.46829
GO:0000790	nuclear chromatin	5	263	144	21052	0.0347977	0.114446	2.77936	1.45845
GO:0005829	cytosol	29	263	1640	21052	0.0366925	0.114446	1.41544	1.43542
GO:0042824	MHC class I peptide loading complex	1	263	3	21052	0.0370141	0.114446	26.6819	1.43163
GO:0097629	extrinsic component of omegasome membrane	1	263	3	21052	0.0370141	0.114446	26.6819	1.43163
GO:0097136	Bcl-2 family protein complex	1	263	3	21052	0.0370141	0.114446	26.6819	1.43163
GO:0008282	ATP-sensitive potassium channel complex	1	263	3	21052	0.0370141	0.114446	26.6819	1.43163
GO:0048787	presynaptic active zone membrane	1	263	3	21052	0.0370141	0.114446	26.6819	1.43163
GO:0097427	microtubule bundle	1	263	3	21052	0.0370141	0.114446	26.6819	1.43163
GO:0060053	neurofilament cytoskeleton	1	263	3	21052	0.0370141	0.114446	26.6819	1.43163
GO:0001750	photoreceptor outer segment	3	263	59	21052	0.0375444	0.114766	4.07012	1.42545
GO:0031234	extrinsic component of cytoplasmic side of plasma membrane	3	263	63	21052	0.0442454	0.13373	3.8117	1.35413
GO:0070969	ULK1-ATG13-FIP200 complex	1	263	4	21052	0.0490463	0.136015	20.0114	1.30939
GO:0070033	synaptobrevin 2-SNAP-25-syntaxin-1a-complexin II complex	1	263	4	21052	0.0490463	0.136015	20.0114	1.30939
GO:0008278	cohesin complex	1	263	4	21052	0.0490463	0.136015	20.0114	1.30939
GO:0005686	U2 snRNP	1	263	4	21052	0.0490463	0.136015	20.0114	1.30939
GO:0097386	glial cell projection	1	263	4	21052	0.0490463	0.136015	20.0114	1.30939
GO:0044299	C-fiber	1	263	4	21052	0.0490463	0.136015	20.0114	1.30939
GO:0071437	invadopodium	1	263	4	21052	0.0490463	0.136015	20.0114	1.30939
GO:0097458	neuron part	1	263	4	21052	0.0490463	0.136015	20.0114	1.30939
GO:0014069	postsynaptic density	5	263	159	21052	0.0496307	0.136231	2.51716	1.30425
GO:0097481	neuronal postsynaptic density	3	263	68	21052	0.0533967	0.143244	3.53142	1.27249
GO:0012505	endomembrane system	4	263	113	21052	0.0534238	0.143244	2.83347	1.27227
GO:0030863	cortical cytoskeleton	2	263	30	21052	0.0537829	0.143244	5.33638	1.26936
GO:0019005	SCF ubiquitin ligase complex	2	263	31	21052	0.0570306	0.146338	5.16423	1.24389
GO:0000118	histone deacetylase complex	2	263	31	21052	0.0570306	0.146338	5.16423	1.24389
GO:0005768	endosome	11	263	512	21052	0.0577146	0.146338	1.71973	1.23871
GO:0005813	centrosome	9	263	392	21052	0.0586249	0.146338	1.83778	1.23192
GO:0045098	type III intermediate filament	1	263	5	21052	0.0609287	0.146338	16.0091	1.21518
GO:0070044	synaptobrevin 2-SNAP-25-syntaxin-1a complex	1	263	5	21052	0.0609287	0.146338	16.0091	1.21518
GO:0035749	myelin sheath adaxonal region	1	263	5	21052	0.0609287	0.146338	16.0091	1.21518
GO:0044309	neuron spine	1	263	5	21052	0.0609287	0.146338	16.0091	1.21518
GO:0033018	sarcoplasmic reticulum lumen	1	263	5	21052	0.0609287	0.146338	16.0091	1.21518
GO:0044294	dendritic growth cone	1	263	5	21052	0.0609287	0.146338	16.0091	1.21518
GO:0034273	ATG1/UKL1 signaling complex	1	263	5	21052	0.0609287	0.146338	16.0091	1.21518
GO:0005654	nucleoplasm	32	263	1959	21052	0.0706673	0.168226	1.30753	1.15078
GO:0044297	cell body	3	263	77	21052	0.07194	0.168503	3.11866	1.14303
GO:0042584	chromaffin granule membrane	1	263	6	21052	0.0726632	0.168503	13.3409	1.13869
GO:0097449	astrocyte projection	1	263	6	21052	0.0726632	0.168503	13.3409	1.13869
GO:0005901	caveola	3	263	81	21052	0.0809881	0.186203	2.96465	1.09158
GO:0031597	cytosolic proteasome complex	1	263	7	21052	0.0842516	0.188864	11.4351	1.07442
GO:0072357	PTW/PP1 phosphatase complex	1	263	7	21052	0.0842516	0.188864	11.4351	1.07442
GO:0044300	cerebellar mossy fiber	1	263	7	21052	0.0842516	0.188864	11.4351	1.07442
GO:0043203	axon hillock	1	263	8	21052	0.0956957	0.209286	10.0057	1.01911
GO:0034706	sodium channel complex	1	263	8	21052	0.0956957	0.209286	10.0057	1.01911
GO:0000124	SAGA complex	1	263	8	21052	0.0956957	0.209286	10.0057	1.01911
GO:0043231	intracellular membrane-bounded organelle	13	263	698	21052	0.0998075	0.216518	1.49082	1.00084
GO:0005925	focal adhesion	8	263	380	21052	0.105089	0.222932	1.68517	0.978444
GO:0043596	nuclear replication fork	1	263	9	21052	0.106997	0.222932	8.89396	0.970627
GO:0032591	dendritic spine membrane	1	263	9	21052	0.106997	0.222932	8.89396	0.970627
GO:0031932	TORC2 complex	1	263	9	21052	0.106997	0.222932	8.89396	0.970627
GO:0005952	cAMP-dependent protein kinase complex	1	263	9	21052	0.106997	0.222932	8.89396	0.970627
GO:0009898	cytoplasmic side of plasma membrane	2	263	45	21052	0.108565	0.222932	3.55758	0.96431
GO:0031201	SNARE complex	2	263	45	21052	0.108565	0.222932	3.55758	0.96431
GO:0001726	ruffle	3	263	95	21052	0.116161	0.233389	2.52776	0.934941
GO:0070852	cell body fiber	1	263	10	21052	0.118158	0.233389	8.00456	0.927536
GO:0031253	cell projection membrane	1	263	10	21052	0.118158	0.233389	8.00456	0.927536
GO:0046581	intercellular canaliculus	1	263	10	21052	0.118158	0.233389	8.00456	0.927536
GO:0042622	photoreceptor outer segment membrane	1	263	10	21052	0.118158	0.233389	8.00456	0.927536
GO:0043204	perikaryon	3	263	96	21052	0.118863	0.233389	2.50143	0.924952
GO:0055037	recycling endosome	3	263	99	21052	0.127109	0.247771	2.42563	0.895823
GO:0031227	intrinsic component of endoplasmic reticulum membrane	1	263	11	21052	0.12918	0.247828	7.27688	0.888804
GO:0035253	ciliary rootlet	1	263	11	21052	0.12918	0.247828	7.27688	0.888804
GO:0031090	organelle membrane	3	263	100	21052	0.129903	0.247828	2.40137	0.886382
GO:0000785	chromatin	3	263	101	21052	0.132717	0.251415	2.37759	0.877072
GO:0043198	dendritic shaft	2	263	52	21052	0.13759	0.256119	3.07868	0.861415
GO:0031235	intrinsic component of the cytoplasmic side of the plasma membrane	1	263	12	21052	0.140065	0.256119	6.67047	0.85367
GO:0031224	intrinsic component of membrane	1	263	12	21052	0.140065	0.256119	6.67047	0.85367
GO:0031045	dense core granule	1	263	12	21052	0.140065	0.256119	6.67047	0.85367
GO:0017146	N-methyl-D-aspartate selective glutamate receptor complex	1	263	12	21052	0.140065	0.256119	6.67047	0.85367
GO:0016529	sarcoplasmic reticulum	2	263	53	21052	0.141865	0.256119	3.02059	0.848124
GO:0017053	transcriptional repressor complex	2	263	53	21052	0.141865	0.256119	3.02059	0.848124
GO:0030139	endocytic vesicle	2	263	54	21052	0.146169	0.26213	2.96465	0.835144
GO:0005884	actin filament	2	263	55	21052	0.1505	0.265157	2.91075	0.822464
GO:0005942	phosphatidylinositol 3-kinase complex	1	263	13	21052	0.150814	0.265157	6.15736	0.821558
GO:0033270	paranode region of axon	1	263	13	21052	0.150814	0.265157	6.15736	0.821558
GO:0016023	cytoplasmic membrane-bounded vesicle	4	263	165	21052	0.152308	0.266044	1.9405	0.817277
GO:0042383	sarcolemma	3	263	110	21052	0.158958	0.27311	2.18306	0.798718
GO:0005791	rough endoplasmic reticulum	2	263	57	21052	0.159236	0.27311	2.80862	0.797959
GO:0046930	pore complex	1	263	14	21052	0.16143	0.27311	5.71754	0.792017
GO:0001518	voltage-gated sodium channel complex	1	263	14	21052	0.16143	0.27311	5.71754	0.792017
GO:0031985	Golgi cisterna	1	263	14	21052	0.16143	0.27311	5.71754	0.792017
GO:0043229	intracellular organelle	1	263	15	21052	0.171913	0.281979	5.33638	0.764692
GO:0034045	pre-autophagosomal structure membrane	1	263	15	21052	0.171913	0.281979	5.33638	0.764692
GO:0031083	BLOC-1 complex	1	263	15	21052	0.171913	0.281979	5.33638	0.764692
GO:0000145	exocyst	1	263	15	21052	0.171913	0.281979	5.33638	0.764692
GO:0031091	platelet alpha granule	1	263	15	21052	0.171913	0.281979	5.33638	0.764692
GO:0005902	microvillus	2	263	61	21052	0.176971	0.288517	2.62445	0.752097
GO:0030496	midbody	3	263	117	21052	0.180366	0.290114	2.05245	0.743844
GO:0030176	integral component of endoplasmic reticulum membrane	2	263	62	21052	0.181453	0.290114	2.58212	0.741235
GO:0031672	A band	1	263	16	21052	0.182265	0.290114	5.00285	0.739296
GO:0033268	node of Ranvier	1	263	16	21052	0.182265	0.290114	5.00285	0.739296
GO:0005770	late endosome	3	263	119	21052	0.186622	0.295302	2.01796	0.729037
GO:0045111	intermediate filament cytoskeleton	2	263	64	21052	0.190466	0.298271	2.50143	0.720182
GO:0005614	interstitial matrix	1	263	17	21052	0.192489	0.298271	4.70857	0.715594
GO:0031307	integral component of mitochondrial outer membrane	1	263	17	21052	0.192489	0.298271	4.70857	0.715594
GO:0030659	cytoplasmic vesicle membrane	3	263	121	21052	0.192934	0.298271	1.9846	0.714592
GO:0042734	presynaptic membrane	2	263	65	21052	0.194995	0.299735	2.46294	0.709976
GO:0016581	NuRD complex	1	263	18	21052	0.202585	0.307884	4.44698	0.693392
GO:0031527	filopodium membrane	1	263	18	21052	0.202585	0.307884	4.44698	0.693392
GO:0005635	nuclear envelope	3	263	126	21052	0.208937	0.315168	1.90585	0.679985
GO:0005667	transcription factor complex	5	263	253	21052	0.210572	0.315168	1.58193	0.6766
GO:0005657	replication fork	1	263	19	21052	0.212556	0.315168	4.21293	0.672527
GO:0031430	M band	1	263	19	21052	0.212556	0.315168	4.21293	0.672527
GO:0032587	ruffle membrane	2	263	69	21052	0.213236	0.315168	2.32016	0.671139
GO:0016234	inclusion body	1	263	20	21052	0.222402	0.326919	4.00228	0.652861
GO:0005887	integral component of plasma membrane	11	263	676	21052	0.22671	0.331441	1.30252	0.644529
GO:0005773	vacuole	1	263	21	21052	0.232126	0.337523	3.8117	0.634277
GO:0005938	cell cortex	3	263	137	21052	0.245074	0.354435	1.75282	0.610703
GO:0036464	cytoplasmic ribonucleoprotein granule	1	263	23	21052	0.251211	0.361368	3.48024	0.599961
GO:0048786	presynaptic active zone	1	263	24	21052	0.260576	0.372645	3.33523	0.584066
GO:0030027	lamellipodium	3	263	142	21052	0.261821	0.372645	1.6911	0.581995
GO:0019898	extrinsic component of membrane	2	263	84	21052	0.282544	0.400023	1.90585	0.548913
GO:0030864	cortical actin cytoskeleton	1	263	27	21052	0.287976	0.401376	2.96465	0.540644
GO:0030667	secretory granule membrane	1	263	27	21052	0.287976	0.401376	2.96465	0.540644
GO:0016235	aggresome	1	263	27	21052	0.287976	0.401376	2.96465	0.540644
GO:0005802	trans-Golgi network	3	263	151	21052	0.292294	0.405295	1.59031	0.53418
GO:0005882	intermediate filament	3	263	154	21052	0.302513	0.417313	1.55933	0.519256
GO:0012506	vesicle membrane	1	263	29	21052	0.305678	0.417398	2.76019	0.514736
GO:0005719	nuclear euchromatin	1	263	29	21052	0.305678	0.417398	2.76019	0.514736
GO:0005844	polysome	1	263	30	21052	0.314364	0.42585	2.66819	0.502567
GO:0005622	intracellular	23	263	1643	21052	0.315034	0.42585	1.12054	0.501642
GO:0005604	basement membrane	2	263	94	21052	0.328602	0.439771	1.7031	0.483329
GO:0016605	PML body	2	263	94	21052	0.328602	0.439771	1.7031	0.483329
GO:0008180	COP9 signalosome	1	263	34	21052	0.348039	0.458934	2.35428	0.458372
GO:0033116	endoplasmic reticulum-Golgi intermediate compartment membrane	1	263	34	21052	0.348039	0.458934	2.35428	0.458372
GO:0005801	cis-Golgi network	1	263	34	21052	0.348039	0.458934	2.35428	0.458372
GO:0031012	extracellular matrix	4	263	240	21052	0.352359	0.462363	1.33409	0.453015
GO:0016592	mediator complex	1	263	35	21052	0.356197	0.465131	2.28702	0.44831
GO:0005739	mitochondrion	22	263	1611	21052	0.363401	0.471078	1.09311	0.439614
GO:0060170	ciliary membrane	1	263	36	21052	0.364254	0.471078	2.22349	0.438596
GO:0001917	photoreceptor inner segment	1	263	38	21052	0.380066	0.489176	2.10646	0.420141
GO:0031252	cell leading edge	1	263	41	21052	0.403053	0.510777	1.95233	0.394637
GO:0016604	nuclear body	1	263	41	21052	0.403053	0.510777	1.95233	0.394637
GO:0045335	phagocytic vesicle	1	263	41	21052	0.403053	0.510777	1.95233	0.394637
GO:0016323	basolateral plasma membrane	3	263	184	21052	0.404445	0.510777	1.30509	0.393141
GO:0055038	recycling endosome membrane	1	263	42	21052	0.410526	0.516034	1.90585	0.38666
GO:0043234	protein complex	8	263	569	21052	0.41773	0.522648	1.12542	0.379105
GO:0032154	cleavage furrow	1	263	44	21052	0.425191	0.529521	1.81922	0.371415
GO:0045171	intercellular bridge	1	263	45	21052	0.432387	0.536001	1.77879	0.364127
GO:0000151	ubiquitin ligase complex	1	263	46	21052	0.439494	0.542311	1.74012	0.357047
GO:0031966	mitochondrial membrane	2	263	120	21052	0.443407	0.544642	1.33409	0.353197
GO:0016328	lateral plasma membrane	1	263	48	21052	0.453442	0.554435	1.66762	0.343479
GO:0010008	endosome membrane	2	263	125	21052	0.464275	0.563384	1.28073	0.333225
GO:0005881	cytoplasmic microtubule	1	263	50	21052	0.467044	0.563384	1.60091	0.330643
GO:0072372	primary cilium	1	263	50	21052	0.467044	0.563384	1.60091	0.330643
GO:0030136	clathrin-coated vesicle	1	263	52	21052	0.480308	0.574235	1.53934	0.31848
GO:0016459	myosin complex	1	263	52	21052	0.480308	0.574235	1.53934	0.31848
GO:0005741	mitochondrial outer membrane	2	263	133	21052	0.496685	0.591187	1.20369	0.303919
GO:0005764	lysosome	4	263	294	21052	0.502045	0.592325	1.08906	0.299257
GO:0016324	apical plasma membrane	4	263	294	21052	0.502045	0.592325	1.08906	0.299257
GO:0031225	anchored component of membrane	2	263	136	21052	0.508515	0.597338	1.17714	0.293696
GO:0016021	integral component of membrane	74	263	5906	21052	0.511648	0.598406	1.00294	0.291028
GO:0031526	brush border membrane	1	263	58	21052	0.518161	0.6034	1.3801	0.285535
GO:0005905	coated pit	1	263	59	21052	0.524198	0.607798	1.35671	0.280505
GO:0005815	microtubule organizing center	4	263	304	21052	0.528276	0.609396	1.05323	0.277139
GO:0005930	axoneme	1	263	60	21052	0.530158	0.609396	1.33409	0.275594
GO:0045121	membrane raft	3	263	224	21052	0.532372	0.609396	1.07204	0.273785
GO:0000932	cytoplasmic mRNA processing body	1	263	61	21052	0.536045	0.609881	1.31222	0.270799
GO:0009986	cell surface	7	263	552	21052	0.53733	0.609881	1.01507	0.269759
GO:0001725	stress fiber	1	263	65	21052	0.558865	0.629015	1.23147	0.252693
GO:0031514	motile cilium	1	263	65	21052	0.558865	0.629015	1.23147	0.252693
GO:0005758	mitochondrial intermembrane space	1	263	67	21052	0.569852	0.638709	1.19471	0.244238
GO:0005615	extracellular space	15	263	1239	21052	0.587847	0.656145	0.969075	0.230736
GO:0005576	extracellular region	21	263	1736	21052	0.594449	0.660772	0.968294	0.225885
GO:0009897	external side of plasma membrane	3	263	253	21052	0.614858	0.679133	0.949158	0.211225
GO:0031901	early endosome membrane	1	263	76	21052	0.616017	0.679133	1.05323	0.210408
GO:0005911	cell-cell junction	2	263	171	21052	0.632591	0.694559	0.936206	0.198877
GO:0031902	late endosome membrane	1	263	83	21052	0.648481	0.709111	0.964405	0.188103
GO:0000777	condensed chromosome kinetochore	1	263	85	21052	0.657243	0.715783	0.941713	0.182274
GO:0005581	collagen trimer	1	263	87	21052	0.665788	0.722166	0.920065	0.176664
GO:0001669	acrosomal vesicle	1	263	94	21052	0.694059	0.746807	0.851549	0.158604
GO:0016363	nuclear matrix	1	263	94	21052	0.694059	0.746807	0.851549	0.158604
GO:0031965	nuclear membrane	2	263	203	21052	0.723446	0.775326	0.788627	0.140594
GO:0005578	proteinaceous extracellular matrix	3	263	301	21052	0.728538	0.777685	0.797797	0.137548
GO:0000922	spindle pole	1	263	106	21052	0.737089	0.783704	0.755147	0.13248
GO:0000776	kinetochore	1	263	107	21052	0.740391	0.783849	0.74809	0.130539
GO:0070062	extracellular vesicular exosome	30	263	2646	21052	0.743053	0.783849	0.907547	0.12898
GO:0045177	apical part of cell	1	263	109	21052	0.74687	0.784796	0.734364	0.126755
GO:0030018	Z disc	1	263	115	21052	0.765356	0.801092	0.696049	0.116137
GO:0005923	tight junction	1	263	118	21052	0.774088	0.807092	0.678353	0.11121
GO:0030141	secretory granule	1	263	123	21052	0.787928	0.81835	0.650777	0.103513
GO:0000775	chromosome, centromeric region	1	263	127	21052	0.798389	0.826026	0.630281	0.0977853
GO:0043235	receptor complex	1	263	132	21052	0.810746	0.835596	0.606406	0.0911153
GO:0005819	spindle	1	263	158	21052	0.863823	0.886902	0.506618	0.0635753
GO:0016607	nuclear speck	1	263	182	21052	0.899539	0.92006	0.439811	0.0459802
GO:0005730	nucleolus	7	263	843	21052	0.906002	0.923161	0.664673	0.0428707
GO:0005929	cilium	1	263	233	21052	0.947426	0.961727	0.343543	0.0234546
GO:0030529	ribonucleoprotein complex	1	263	334	21052	0.985487	0.992009	0.239658	0.00634929
GO:0005694	chromosome	1	263	343	21052	0.987063	0.992009	0.233369	0.00565501
GO:0005743	mitochondrial inner membrane	1	263	351	21052	0.988321	0.992009	0.22805	0.00510204
GO:0005575	cellular_component	43	263	5822	21052	0.999995	0.999995	0.591199	2.2113e-06
