# Supplementary material for: Cognitive impairment and transcriptomic profile in hippocampus of young mice after multiple neonatal exposures to sevoflurane
Source: Aging (Albany NY). 2019 Oct 3;11(19):8386–417. doi: 10.18632/aging.102326 (PMC6814607; doi:10.18632/aging.102326)
Supplement: Supplementary Table 8 [file aging-11-102326-s007.xlsx]

## Sheet: UpGO_Result
Supplementary Table 8. All GO terms of molecular function associated with up-regulated DEGs.
GOID	GOTerm	DifGene	AllDifGene	GeneInGO	AllGene	P-Value	FDR	Enrichment	(-log10P)
GO:0008324	cation transmembrane transporter activity	2	47	21	20728	0.00102812	0.0684018	42.002	2.98796
GO:1990244	histone kinase activity (H2A-T120 specific)	1	47	1	20728	0.00226746	0.0684018	441.021	2.64446
GO:0008445	D-aspartate oxidase activity	1	47	1	20728	0.00226746	0.0684018	441.021	2.64446
GO:0015491	cation:cation antiporter activity	1	47	1	20728	0.00226746	0.0684018	441.021	2.64446
GO:0004489	methylenetetrahydrofolate reductase (NAD(P)H) activity	1	47	1	20728	0.00226746	0.0684018	441.021	2.64446
GO:0004903	growth hormone receptor activity	1	47	1	20728	0.00226746	0.0684018	441.021	2.64446
GO:0004478	methionine adenosyltransferase activity	1	47	2	20728	0.0045299	0.0819911	220.511	2.34391
GO:0004692	cGMP-dependent protein kinase activity	1	47	2	20728	0.0045299	0.0819911	220.511	2.34391
GO:0003884	D-amino-acid oxidase activity	1	47	2	20728	0.0045299	0.0819911	220.511	2.34391
GO:0030156	benzodiazepine receptor binding	1	47	2	20728	0.0045299	0.0819911	220.511	2.34391
GO:0036042	long-chain fatty acyl-CoA binding	1	47	3	20728	0.00678731	0.111682	147.007	2.1683
GO:0015226	carnitine transmembrane transporter activity	1	47	4	20728	0.00903971	0.125861	110.255	2.04385
GO:0005042	netrin receptor activity	1	47	4	20728	0.00903971	0.125861	110.255	2.04385
GO:0048273	mitogen-activated protein kinase p38 binding	1	47	5	20728	0.0112871	0.136047	88.2043	1.94742
GO:0015651	quaternary ammonium group transmembrane transporter activity	1	47	6	20728	0.0135295	0.136047	73.5035	1.86872
GO:0005166	neurotrophin p75 receptor binding	1	47	6	20728	0.0135295	0.136047	73.5035	1.86872
GO:0004565	beta-galactosidase activity	1	47	6	20728	0.0135295	0.136047	73.5035	1.86872
GO:0015101	organic cation transmembrane transporter activity	1	47	6	20728	0.0135295	0.136047	73.5035	1.86872
GO:0072341	modified amino acid binding	1	47	7	20728	0.015767	0.139007	63.003	1.80225
GO:0016641	oxidoreductase activity, acting on the CH-NH2 group of donors, oxygen as acceptor	1	47	7	20728	0.015767	0.139007	63.003	1.80225
GO:0003676	nucleic acid binding	7	47	1205	20728	0.018075	0.139007	2.56195	1.74292
GO:0019855	calcium channel inhibitor activity	1	47	9	20728	0.0202269	0.139007	49.0024	1.69407
GO:0008061	chitin binding	1	47	11	20728	0.0246671	0.139007	40.0928	1.60788
GO:0052859	glucan endo-1,4-beta-glucosidase activity	1	47	11	20728	0.0246671	0.139007	40.0928	1.60788
GO:0052736	beta-glucanase activity	1	47	11	20728	0.0246671	0.139007	40.0928	1.60788
GO:0015927	trehalase activity	1	47	11	20728	0.0246671	0.139007	40.0928	1.60788
GO:0015925	galactosidase activity	1	47	11	20728	0.0246671	0.139007	40.0928	1.60788
GO:0015924	mannosyl-oligosaccharide mannosidase activity	1	47	11	20728	0.0246671	0.139007	40.0928	1.60788
GO:0052769	beta-6-sulfate-N-acetylglucosaminidase activity	1	47	11	20728	0.0246671	0.139007	40.0928	1.60788
GO:0044654	starch alpha-glucosidase activity	1	47	11	20728	0.0246671	0.139007	40.0928	1.60788
GO:0044653	dextrin alpha-glucosidase activity	1	47	11	20728	0.0246671	0.139007	40.0928	1.60788
GO:0008933	lytic transglycosylase activity	1	47	11	20728	0.0246671	0.139007	40.0928	1.60788
GO:0015929	hexosaminidase activity	1	47	12	20728	0.0268798	0.139007	36.7518	1.57057
GO:0015928	fucosidase activity	1	47	12	20728	0.0268798	0.139007	36.7518	1.57057
GO:0015926	glucosidase activity	1	47	12	20728	0.0268798	0.139007	36.7518	1.57057
GO:0016160	amylase activity	1	47	14	20728	0.0312905	0.157322	31.5015	1.50459
GO:0005385	zinc ion transmembrane transporter activity	1	47	15	20728	0.0334885	0.161459	29.4014	1.4751
GO:0005246	calcium channel regulator activity	1	47	16	20728	0.0356816	0.161459	27.5638	1.44756
GO:0015923	mannosidase activity	1	47	16	20728	0.0356816	0.161459	27.5638	1.44756
GO:0030553	cGMP binding	1	47	16	20728	0.0356816	0.161459	27.5638	1.44756
GO:0048037	cofactor binding	1	47	17	20728	0.0378699	0.167182	25.9424	1.42171
GO:0015075	ion transmembrane transporter activity	1	47	18	20728	0.0400533	0.172611	24.5012	1.39736
GO:0000062	fatty-acyl-CoA binding	1	47	23	20728	0.0508977	0.214244	19.1748	1.2933
GO:0005504	fatty acid binding	1	47	24	20728	0.0530521	0.218237	18.3759	1.2753
GO:0019706	protein-cysteine S-palmitoyltransferase activity	1	47	25	20728	0.0552018	0.220139	17.6409	1.25805
GO:0031492	nucleosomal DNA binding	1	47	27	20728	0.0594868	0.220139	16.3341	1.22558
GO:0016597	amino acid binding	1	47	29	20728	0.0637528	0.220139	15.2076	1.1955
GO:0001540	beta-amyloid binding	1	47	29	20728	0.0637528	0.220139	15.2076	1.1955
GO:0003887	DNA-directed DNA polymerase activity	1	47	29	20728	0.0637528	0.220139	15.2076	1.1955
GO:0052771	coenzyme F390-G hydrolase activity	1	47	31	20728	0.0679998	0.220139	14.2265	1.16749
GO:0052770	coenzyme F390-A hydrolase activity	1	47	31	20728	0.0679998	0.220139	14.2265	1.16749
GO:0042169	SH2 domain binding	1	47	32	20728	0.0701162	0.220139	13.7819	1.15418
GO:0003923	GPI-anchor transamidase activity	1	47	35	20728	0.0764374	0.220139	12.6006	1.11669
GO:0051539	4 iron, 4 sulfur cluster binding	1	47	36	20728	0.0785351	0.220139	12.2506	1.10494
GO:0017046	peptide hormone binding	1	47	36	20728	0.0785351	0.220139	12.2506	1.10494
GO:0005201	extracellular matrix structural constituent	1	47	36	20728	0.0785351	0.220139	12.2506	1.10494
GO:0019838	growth factor binding	1	47	37	20728	0.0806281	0.220139	11.9195	1.09351
GO:0001046	core promoter sequence-specific DNA binding	1	47	38	20728	0.0827165	0.220139	11.6058	1.08241
GO:0050661	NADP binding	1	47	39	20728	0.0848002	0.220139	11.3082	1.0716
GO:0022857	transmembrane transporter activity	1	47	41	20728	0.0889538	0.220139	10.7566	1.05084
GO:0004553	hydrolase activity, hydrolyzing O-glycosyl compounds	1	47	44	20728	0.0951495	0.220139	10.0232	1.02159
GO:0004896	cytokine receptor activity	1	47	44	20728	0.0951495	0.220139	10.0232	1.02159
GO:0005215	transporter activity	2	47	231	20728	0.0964931	0.220139	3.81837	1.0155
GO:0005097	Rab GTPase activator activity	1	47	45	20728	0.0972056	0.220139	9.80047	1.01231
GO:0097110	scaffold protein binding	1	47	47	20728	0.101304	0.220139	9.38343	0.994373
GO:0043130	ubiquitin binding	1	47	50	20728	0.107418	0.220139	8.82043	0.968924
GO:0000979	RNA polymerase II core promoter sequence-specific DNA binding	1	47	51	20728	0.109446	0.220139	8.64748	0.960798
GO:0050839	cell adhesion molecule binding	1	47	51	20728	0.109446	0.220139	8.64748	0.960798
GO:0031490	chromatin DNA binding	1	47	51	20728	0.109446	0.220139	8.64748	0.960798
GO:0016409	palmitoyltransferase activity	1	47	52	20728	0.111471	0.220139	8.48118	0.952839
GO:0030674	protein binding, bridging	1	47	52	20728	0.111471	0.220139	8.48118	0.952839
GO:0008289	lipid binding	2	47	254	20728	0.113026	0.220139	3.47261	0.946821
GO:0005080	protein kinase C binding	1	47	53	20728	0.11349	0.220139	8.32116	0.945041
GO:0005518	collagen binding	1	47	55	20728	0.117517	0.220139	8.01857	0.929901
GO:0046872	metal ion binding	11	47	3374	20728	0.131357	0.220139	1.43783	0.881548
GO:0051536	iron-sulfur cluster binding	1	47	63	20728	0.133443	0.220139	7.00034	0.874705
GO:0016740	transferase activity	6	47	1553	20728	0.137139	0.220139	1.70388	0.862838
GO:0000980	RNA polymerase II distal enhancer sequence-specific DNA binding	1	47	67	20728	0.1413	0.220139	6.58241	0.849858
GO:0050660	flavin adenine dinucleotide binding	1	47	72	20728	0.151023	0.220139	6.1253	0.820956
GO:0004175	endopeptidase activity	1	47	78	20728	0.162549	0.220139	5.65412	0.789014
GO:0018707	1-phenanthrol methyltransferase activity	1	47	81	20728	0.168255	0.220139	5.44471	0.774032
GO:0080012	trihydroxyferuloyl spermidine O-methyltransferase activity	1	47	81	20728	0.168255	0.220139	5.44471	0.774032
GO:0008988	rRNA (adenine-N6-)-methyltransferase activity	1	47	81	20728	0.168255	0.220139	5.44471	0.774032
GO:0052735	tRNA (cytosine-3-)-methyltransferase activity	1	47	81	20728	0.168255	0.220139	5.44471	0.774032
GO:0019903	protein phosphatase binding	1	47	81	20728	0.168255	0.220139	5.44471	0.774032
GO:0070677	rRNA (cytosine-2'-O-)-methyltransferase activity	1	47	81	20728	0.168255	0.220139	5.44471	0.774032
GO:0018423	protein C-terminal leucine carboxyl O-methyltransferase activity	1	47	81	20728	0.168255	0.220139	5.44471	0.774032
GO:0052624	2-phytyl-1,4-naphthoquinone methyltransferase activity	1	47	81	20728	0.168255	0.220139	5.44471	0.774032
GO:0043803	hydroxyneurosporene-O-methyltransferase activity	1	47	81	20728	0.168255	0.220139	5.44471	0.774032
GO:0008169	C-methyltransferase activity	1	47	81	20728	0.168255	0.220139	5.44471	0.774032
GO:0043770	demethylmenaquinone methyltransferase activity	1	47	81	20728	0.168255	0.220139	5.44471	0.774032
GO:0009383	rRNA (cytosine-C5-)-methyltransferase activity	1	47	81	20728	0.168255	0.220139	5.44471	0.774032
GO:0008172	S-methyltransferase activity	1	47	81	20728	0.168255	0.220139	5.44471	0.774032
GO:0008174	mRNA methyltransferase activity	1	47	81	20728	0.168255	0.220139	5.44471	0.774032
GO:0043776	cobalt-precorrin-6B C5-methyltransferase activity	1	47	81	20728	0.168255	0.220139	5.44471	0.774032
GO:0043777	cobalt-precorrin-7 C15-methyltransferase activity	1	47	81	20728	0.168255	0.220139	5.44471	0.774032
GO:0043780	cobalt-precorrin-5B C1-methyltransferase activity	1	47	81	20728	0.168255	0.220139	5.44471	0.774032
GO:0071424	rRNA (cytosine-N4-)-methyltransferase activity	1	47	81	20728	0.168255	0.220139	5.44471	0.774032
GO:0016205	selenocysteine methyltransferase activity	1	47	81	20728	0.168255	0.220139	5.44471	0.774032
GO:0043827	tRNA (adenine-57, 58-N(1)-) methyltransferase activity	1	47	81	20728	0.168255	0.220139	5.44471	0.774032
GO:0043782	cobalt-precorrin-3 C17-methyltransferase activity	1	47	81	20728	0.168255	0.220139	5.44471	0.774032
GO:0043791	dimethylamine methyltransferase activity	1	47	81	20728	0.168255	0.220139	5.44471	0.774032
GO:0016436	rRNA (uridine) methyltransferase activity	1	47	81	20728	0.168255	0.220139	5.44471	0.774032
GO:0043834	trimethylamine methyltransferase activity	1	47	81	20728	0.168255	0.220139	5.44471	0.774032
GO:0034541	dimethylarsinite methyltransferase activity	1	47	81	20728	0.168255	0.220139	5.44471	0.774032
GO:0043833	methylamine-specific methylcobalamin:coenzyme M methyltransferase activity	1	47	81	20728	0.168255	0.220139	5.44471	0.774032
GO:0052665	tRNA (uracil-2'-O-)-methyltransferase activity	1	47	81	20728	0.168255	0.220139	5.44471	0.774032
GO:0052666	tRNA (cytosine-2'-O-)-methyltransferase activity	1	47	81	20728	0.168255	0.220139	5.44471	0.774032
GO:0034933	1-hydroxy-6-methoxypyrene methyltransferase activity	1	47	81	20728	0.168255	0.220139	5.44471	0.774032
GO:0052667	phosphomethylethanolamine N-methyltransferase activity	1	47	81	20728	0.168255	0.220139	5.44471	0.774032
GO:0034931	1-hydroxypyrene methyltransferase activity	1	47	81	20728	0.168255	0.220139	5.44471	0.774032
GO:0016426	tRNA (adenine) methyltransferase activity	1	47	81	20728	0.168255	0.220139	5.44471	0.774032
GO:0016427	tRNA (cytosine) methyltransferase activity	1	47	81	20728	0.168255	0.220139	5.44471	0.774032
GO:0016273	arginine N-methyltransferase activity	1	47	81	20728	0.168255	0.220139	5.44471	0.774032
GO:0034807	4,5-dihydroxybenzo(a)pyrene methyltransferase activity	1	47	81	20728	0.168255	0.220139	5.44471	0.774032
GO:0016278	lysine N-methyltransferase activity	1	47	81	20728	0.168255	0.220139	5.44471	0.774032
GO:0016433	rRNA (adenine) methyltransferase activity	1	47	81	20728	0.168255	0.220139	5.44471	0.774032
GO:0016434	rRNA (cytosine) methyltransferase activity	1	47	81	20728	0.168255	0.220139	5.44471	0.774032
GO:0019702	protein-arginine N5-methyltransferase activity	1	47	81	20728	0.168255	0.220139	5.44471	0.774032
GO:0016435	rRNA (guanine) methyltransferase activity	1	47	81	20728	0.168255	0.220139	5.44471	0.774032
GO:0008650	rRNA (uridine-2'-O-)-methyltransferase activity	1	47	81	20728	0.168255	0.220139	5.44471	0.774032
GO:0043851	methanol-specific methylcobalamin:coenzyme M methyltransferase activity	1	47	81	20728	0.168255	0.220139	5.44471	0.774032
GO:0043852	monomethylamine methyltransferase activity	1	47	81	20728	0.168255	0.220139	5.44471	0.774032
GO:0051994	P-methyltransferase activity	1	47	81	20728	0.168255	0.220139	5.44471	0.774032
GO:0051995	Se-methyltransferase activity	1	47	81	20728	0.168255	0.220139	5.44471	0.774032
GO:0016300	tRNA (uracil) methyltransferase activity	1	47	81	20728	0.168255	0.220139	5.44471	0.774032
GO:0016423	tRNA (guanine) methyltransferase activity	1	47	81	20728	0.168255	0.220139	5.44471	0.774032
GO:0000179	rRNA (adenine-N6,N6-)-dimethyltransferase activity	1	47	82	20728	0.170148	0.220139	5.37831	0.769172
GO:0009019	tRNA (guanine-N1-)-methyltransferase activity	1	47	82	20728	0.170148	0.220139	5.37831	0.769172
GO:0004809	tRNA (guanine-N2-)-methyltransferase activity	1	47	82	20728	0.170148	0.220139	5.37831	0.769172
GO:0008425	2-polyprenyl-6-methoxy-1,4-benzoquinone methyltransferase activity	1	47	82	20728	0.170148	0.220139	5.37831	0.769172
GO:0009008	DNA-methyltransferase activity	1	47	82	20728	0.170148	0.220139	5.37831	0.769172
GO:0016428	tRNA (cytosine-5-)-methyltransferase activity	1	47	82	20728	0.170148	0.220139	5.37831	0.769172
GO:0016429	tRNA (adenine-N1-)-methyltransferase activity	1	47	82	20728	0.170148	0.220139	5.37831	0.769172
GO:0016274	protein-arginine N-methyltransferase activity	1	47	82	20728	0.170148	0.220139	5.37831	0.769172
GO:0008649	rRNA methyltransferase activity	1	47	82	20728	0.170148	0.220139	5.37831	0.769172
GO:0030792	methylarsonite methyltransferase activity	1	47	82	20728	0.170148	0.220139	5.37831	0.769172
GO:0008170	N-methyltransferase activity	1	47	83	20728	0.172037	0.220139	5.31351	0.764377
GO:0003880	protein C-terminal carboxyl O-methyltransferase activity	1	47	83	20728	0.172037	0.220139	5.31351	0.764377
GO:0008173	RNA methyltransferase activity	1	47	84	20728	0.173922	0.220139	5.25025	0.759645
GO:0008175	tRNA methyltransferase activity	1	47	84	20728	0.173922	0.220139	5.25025	0.759645
GO:0016279	protein-lysine N-methyltransferase activity	1	47	84	20728	0.173922	0.220139	5.25025	0.759645
GO:0016779	nucleotidyltransferase activity	1	47	84	20728	0.173922	0.220139	5.25025	0.759645
GO:0008171	O-methyltransferase activity	1	47	86	20728	0.17768	0.223333	5.12815	0.750362
GO:0008276	protein methyltransferase activity	1	47	87	20728	0.179552	0.22413	5.06921	0.74581
GO:0016798	hydrolase activity, acting on glycosyl bonds	1	47	92	20728	0.188851	0.234124	4.79371	0.72388
GO:0002020	protease binding	1	47	100	20728	0.203516	0.250588	4.41021	0.691401
GO:0003677	DNA binding	6	47	1802	20728	0.221363	0.270721	1.46844	0.654894
GO:0015293	symporter activity	1	47	112	20728	0.225028	0.273356	3.93769	0.647764
GO:0030165	PDZ domain binding	1	47	119	20728	0.237313	0.286358	3.70606	0.624679
GO:0004222	metalloendopeptidase activity	1	47	120	20728	0.239052	0.286503	3.67518	0.621507
GO:0004674	protein serine/threonine kinase activity	2	47	413	20728	0.240599	0.286503	2.1357	0.618706
GO:0008201	heparin binding	1	47	130	20728	0.256234	0.303126	3.39247	0.591364
GO:0003674	molecular_function	18	47	6820	20728	0.260177	0.305793	1.16399	0.584731
GO:0003700	sequence-specific DNA binding transcription factor activity	3	47	794	20728	0.268311	0.312927	1.66633	0.571361
GO:0000981	sequence-specific DNA binding RNA polymerase II transcription factor activity	1	47	138	20728	0.269705	0.312927	3.19581	0.569111
GO:0003713	transcription coactivator activity	1	47	162	20728	0.308702	0.355892	2.72235	0.510461
GO:0016746	transferase activity, transferring acyl groups	1	47	173	20728	0.325887	0.373326	2.54926	0.486933
GO:0008168	methyltransferase activity	1	47	176	20728	0.330501	0.375611	2.5058	0.480828
GO:0008237	metallopeptidase activity	1	47	177	20728	0.332032	0.375611	2.49165	0.478821
GO:0005198	structural molecule activity	1	47	183	20728	0.341146	0.383525	2.40995	0.467059
GO:0046983	protein dimerization activity	1	47	188	20728	0.348649	0.388437	2.34586	0.457612
GO:0016772	transferase activity, transferring phosphorus-containing groups	2	47	543	20728	0.349808	0.388437	1.62439	0.45617
GO:0005524	ATP binding	4	47	1465	20728	0.427103	0.471375	1.20415	0.369468
GO:0016491	oxidoreductase activity	2	47	647	20728	0.433758	0.475819	1.36328	0.362753
GO:0005509	calcium ion binding	2	47	657	20728	0.441552	0.481452	1.34253	0.355018
GO:0044822	poly(A) RNA binding	3	47	1117	20728	0.468456	0.50511	1.18448	0.329331
GO:0008270	zinc ion binding	3	47	1124	20728	0.472623	0.50511	1.1771	0.325486
GO:0000166	nucleotide binding	5	47	1986	20728	0.473371	0.50511	1.11033	0.324798
GO:0016301	kinase activity	2	47	700	20728	0.474413	0.50511	1.26006	0.323843
GO:0042803	protein homodimerization activity	2	47	717	20728	0.487096	0.514919	1.23018	0.312386
GO:0003824	catalytic activity	2	47	720	20728	0.489315	0.514919	1.22506	0.310412
GO:0005515	protein binding	10	47	4232	20728	0.499437	0.522533	1.04211	0.301519
GO:0005102	receptor binding	1	47	379	20728	0.580334	0.60368	1.16364	0.236322
GO:0019901	protein kinase binding	1	47	399	20728	0.599309	0.619857	1.10532	0.222349
GO:0004672	protein kinase activity	1	47	524	20728	0.700243	0.720136	0.841644	0.154751
GO:0008233	peptidase activity	1	47	548	20728	0.716547	0.73274	0.804783	0.144755
GO:0016787	hydrolase activity	3	47	1640	20728	0.729872	0.742173	0.806746	0.136753
GO:0043565	sequence-specific DNA binding	1	47	581	20728	0.737556	0.745797	0.759073	0.132205
GO:0042802	identical protein binding	1	47	588	20728	0.741813	0.745934	0.750036	0.129706
GO:0003723	RNA binding	1	47	711	20728	0.80647	0.80647	0.620283	0.0934119
