# Supplementary material for: Cognitive impairment and transcriptomic profile in hippocampus of young mice after multiple neonatal exposures to sevoflurane
Source: Aging (Albany NY). 2019 Oct 3;11(19):8386–417. doi: 10.18632/aging.102326 (PMC6814607; doi:10.18632/aging.102326)
Supplement: Supplementary Table 9 [file aging-11-102326-s005.xlsx]

## Sheet: DownGO_Result
Supplementary Table 9. All GO terms of molecular function associated with down-regulated DEGs.
GOID	GOTerm	DifGene	AllDifGene	GeneInGO	AllGene	P-Value	FDR	Enrichment	(-log10P)
GO:0005244	voltage-gated ion channel activity	16	258	143	20728	3.11638e-11	1.41484e-08	8.98921	10.5063
GO:0005515	protein binding	95	258	4232	20728	7.06318e-10	1.60334e-07	1.8035	9.151
GO:0005249	voltage-gated potassium channel activity	8	258	68	20728	2.00486e-06	0.000303403	9.45189	5.69792
GO:0043565	sequence-specific DNA binding	22	258	581	20728	4.03165e-06	0.000457592	3.04218	5.39452
GO:0005267	potassium channel activity	8	258	85	20728	1.088e-05	0.000987906	7.56151	4.96337
GO:0004674	protein serine/threonine kinase activity	17	258	413	20728	1.8101e-05	0.00136965	3.30702	4.7423
GO:0016772	transferase activity, transferring phosphorus-containing groups	19	258	543	20728	5.44518e-05	0.00326173	2.8112	4.26399
GO:0003700	sequence-specific DNA binding transcription factor activity	24	258	794	20728	5.97971e-05	0.00326173	2.42845	4.22332
GO:0016301	kinase activity	22	258	700	20728	6.97085e-05	0.00326173	2.52501	4.15671
GO:0005242	inward rectifier potassium channel activity	4	258	19	20728	7.84501e-05	0.00326173	16.9139	4.10541
GO:0005251	delayed rectifier potassium channel activity	5	258	36	20728	7.90287e-05	0.00326173	11.1585	4.10222
GO:0005216	ion channel activity	10	258	182	20728	9.84499e-05	0.00372469	4.41435	4.00678
GO:0004672	protein kinase activity	18	258	524	20728	0.000108007	0.00377194	2.75981	3.96655
GO:0004016	adenylate cyclase activity	3	258	10	20728	0.000214403	0.00695278	24.1023	3.66877
GO:0001540	beta-amyloid binding	4	258	29	20728	0.000435932	0.0131942	11.0815	3.36058
GO:0030165	PDZ domain binding	7	258	119	20728	0.000731668	0.0207611	4.72595	3.13569
GO:0003677	DNA binding	38	258	1802	20728	0.000922765	0.0246433	1.69421	3.03491
GO:0003690	double-stranded DNA binding	7	258	125	20728	0.00097809	0.0246696	4.4991	3.00962
GO:0001077	RNA polymerase II core promoter proximal region sequence-specific DNA binding transcription factor activity involved in positive regulation of transcription	10	258	254	20728	0.00136406	0.0325938	3.16303	2.86517
GO:0008017	microtubule binding	8	258	178	20728	0.00179161	0.0401608	3.61084	2.74676
GO:0003785	actin monomer binding	3	258	20	20728	0.00185766	0.0401608	12.0512	2.73103
GO:0015467	G-protein activated inward rectifier potassium channel activity	2	258	6	20728	0.00223979	0.0442116	26.7804	2.64979
GO:0008294	calcium- and calmodulin-responsive adenylate cyclase activity	2	258	6	20728	0.00223979	0.0442116	26.7804	2.64979
GO:0000977	RNA polymerase II regulatory region sequence-specific DNA binding	7	258	146	20728	0.002388	0.0451731	3.85197	2.62197
GO:0031072	heat shock protein binding	4	258	46	20728	0.00253867	0.0461022	6.98618	2.59539
GO:0005524	ATP binding	31	258	1465	20728	0.00265896	0.0464295	1.70005	2.57529
GO:0016849	phosphorus-oxygen lyase activity	3	258	23	20728	0.00280757	0.0472088	10.4793	2.55167
GO:0036312	phosphatidylinositol 3-kinase regulatory subunit binding	2	258	7	20728	0.00310999	0.049774	22.9546	2.50724
GO:0043014	alpha-tubulin binding	3	258	24	20728	0.0031794	0.049774	10.0426	2.49766
GO:0015271	outward rectifier potassium channel activity	2	258	8	20728	0.00411269	0.0622386	20.0853	2.38587
GO:0003707	steroid hormone receptor activity	4	258	53	20728	0.00425708	0.0623457	6.06348	2.37089
GO:0051117	ATPase binding	4	258	55	20728	0.00486338	0.0689993	5.84299	2.31306
GO:0001206	RNA polymerase II distal enhancer sequence-specific DNA binding transcription factor activity involved in negative regulation of transcription	2	258	9	20728	0.00524446	0.0721511	17.8536	2.2803
GO:0019904	protein domain specific binding	9	258	264	20728	0.00600787	0.0802228	2.7389	2.22128
GO:0000981	sequence-specific DNA binding RNA polymerase II transcription factor activity	6	258	138	20728	0.00770083	0.0856198	3.49309	2.11346
GO:0051787	misfolded protein binding	2	258	11	20728	0.00788195	0.0856198	14.6075	2.10337
GO:0001948	glycoprotein binding	4	258	65	20728	0.00876775	0.0856198	4.94407	2.05711
GO:0001047	core promoter binding	4	258	66	20728	0.00924414	0.0856198	4.86916	2.03413
GO:0004879	ligand-activated sequence-specific DNA binding RNA polymerase II transcription factor activity	3	258	35	20728	0.00929927	0.0856198	6.88638	2.03155
GO:0047485	protein N-terminus binding	5	258	106	20728	0.0105203	0.0856198	3.78967	1.97797
GO:0000287	magnesium ion binding	7	258	193	20728	0.0107204	0.0856198	2.91393	1.96979
GO:0019901	protein kinase binding	11	258	399	20728	0.0117308	0.0856198	2.21492	1.93067
GO:0001010	sequence-specific DNA binding transcription factor recruiting transcription factor activity	1	258	1	20728	0.0124469	0.0856198	80.3411	1.90494
GO:0016501	prostacyclin receptor activity	1	258	1	20728	0.0124469	0.0856198	80.3411	1.90494
GO:0016314	phosphatidylinositol-3,4,5-trisphosphate 3-phosphatase activity	1	258	1	20728	0.0124469	0.0856198	80.3411	1.90494
GO:0070012	oligopeptidase activity	1	258	1	20728	0.0124469	0.0856198	80.3411	1.90494
GO:0031741	type B gastrin/cholecystokinin receptor binding	1	258	1	20728	0.0124469	0.0856198	80.3411	1.90494
GO:0010857	calcium-dependent protein kinase activity	1	258	1	20728	0.0124469	0.0856198	80.3411	1.90494
GO:0042988	X11-like protein binding	1	258	1	20728	0.0124469	0.0856198	80.3411	1.90494
GO:0008792	arginine decarboxylase activity	1	258	1	20728	0.0124469	0.0856198	80.3411	1.90494
GO:0005252	open rectifier potassium channel activity	1	258	1	20728	0.0124469	0.0856198	80.3411	1.90494
GO:0098632	protein binding involved in cell-cell adhesion	1	258	1	20728	0.0124469	0.0856198	80.3411	1.90494
GO:0033823	procollagen glucosyltransferase activity	1	258	1	20728	0.0124469	0.0856198	80.3411	1.90494
GO:0033781	cholesterol 24-hydroxylase activity	1	258	1	20728	0.0124469	0.0856198	80.3411	1.90494
GO:0005072	transforming growth factor beta receptor, cytoplasmic mediator activity	1	258	1	20728	0.0124469	0.0856198	80.3411	1.90494
GO:0017188	aspartate N-acetyltransferase activity	1	258	1	20728	0.0124469	0.0856198	80.3411	1.90494
GO:0043492	ATPase activity, coupled to movement of substances	1	258	1	20728	0.0124469	0.0856198	80.3411	1.90494
GO:0086062	voltage-gated sodium channel activity involved in Purkinje myocyte action potential	1	258	1	20728	0.0124469	0.0856198	80.3411	1.90494
GO:0070853	myosin VI binding	1	258	1	20728	0.0124469	0.0856198	80.3411	1.90494
GO:0045503	dynein light chain binding	1	258	1	20728	0.0124469	0.0856198	80.3411	1.90494
GO:0004940	beta1-adrenergic receptor activity	1	258	1	20728	0.0124469	0.0856198	80.3411	1.90494
GO:0051800	phosphatidylinositol-3,4-bisphosphate 3-phosphatase activity	1	258	1	20728	0.0124469	0.0856198	80.3411	1.90494
GO:0032028	myosin head/neck binding	1	258	1	20728	0.0124469	0.0856198	80.3411	1.90494
GO:0051717	inositol-1,3,4,5-tetrakisphosphate 3-phosphatase activity	1	258	1	20728	0.0124469	0.0856198	80.3411	1.90494
GO:0055131	C3HC4-type RING finger domain binding	1	258	1	20728	0.0124469	0.0856198	80.3411	1.90494
GO:0070539	linoleic acid binding	1	258	1	20728	0.0124469	0.0856198	80.3411	1.90494
GO:0019900	kinase binding	4	258	75	20728	0.0143007	0.0969031	4.28486	1.84464
GO:0005516	calmodulin binding	6	258	159	20728	0.0147705	0.0986146	3.03174	1.83061
GO:0001085	RNA polymerase II transcription factor binding	3	258	43	20728	0.0163071	0.107067	5.60519	1.78762
GO:0050811	GABA receptor binding	2	258	16	20728	0.0165081	0.107067	10.0426	1.7823
GO:0019902	phosphatase binding	3	258	45	20728	0.0184143	0.117748	5.35607	1.73484
GO:0051015	actin filament binding	5	258	124	20728	0.0195585	0.123327	3.23956	1.70866
GO:0000978	RNA polymerase II core promoter proximal region sequence-specific DNA binding	9	258	324	20728	0.0206656	0.128523	2.2317	1.68475
GO:0003756	protein disulfide isomerase activity	2	258	19	20728	0.0229564	0.129101	8.45696	1.6391
GO:0004586	ornithine decarboxylase activity	1	258	2	20728	0.0247395	0.129101	40.1705	1.60661
GO:0015489	putrescine transmembrane transporter activity	1	258	2	20728	0.0247395	0.129101	40.1705	1.60661
GO:0004356	glutamate-ammonia ligase activity	1	258	2	20728	0.0247395	0.129101	40.1705	1.60661
GO:0031755	Edg-2 lysophosphatidic acid receptor binding	1	258	2	20728	0.0247395	0.129101	40.1705	1.60661
GO:0005326	neurotransmitter transporter activity	1	258	2	20728	0.0247395	0.129101	40.1705	1.60661
GO:0042978	ornithine decarboxylase activator activity	1	258	2	20728	0.0247395	0.129101	40.1705	1.60661
GO:0008427	calcium-dependent protein kinase inhibitor activity	1	258	2	20728	0.0247395	0.129101	40.1705	1.60661
GO:0022841	potassium ion leak channel activity	1	258	2	20728	0.0247395	0.129101	40.1705	1.60661
GO:0015054	gastrin receptor activity	1	258	2	20728	0.0247395	0.129101	40.1705	1.60661
GO:0001729	ceramide kinase activity	1	258	2	20728	0.0247395	0.129101	40.1705	1.60661
GO:0003913	DNA photolyase activity	1	258	2	20728	0.0247395	0.129101	40.1705	1.60661
GO:0001641	group II metabotropic glutamate receptor activity	1	258	2	20728	0.0247395	0.129101	40.1705	1.60661
GO:0047696	beta-adrenergic receptor kinase activity	1	258	2	20728	0.0247395	0.129101	40.1705	1.60661
GO:0017075	syntaxin-1 binding	2	258	20	20728	0.0253007	0.130529	8.03411	1.59687
GO:0000149	SNARE binding	3	258	52	20728	0.0269255	0.13735	4.63506	1.56984
GO:0003779	actin binding	9	258	342	20728	0.0279976	0.140701	2.11424	1.55288
GO:0051879	Hsp90 protein binding	2	258	22	20728	0.0302653	0.140701	7.30374	1.51905
GO:0051018	protein kinase A binding	2	258	22	20728	0.0302653	0.140701	7.30374	1.51905
GO:0019905	syntaxin binding	3	258	56	20728	0.0325809	0.140701	4.30399	1.48704
GO:0005096	GTPase activator activity	6	258	191	20728	0.0326642	0.140701	2.5238	1.48593
GO:0005520	insulin-like growth factor binding	2	258	23	20728	0.0328804	0.140701	6.98618	1.48306
GO:0017022	myosin binding	2	258	23	20728	0.0328804	0.140701	6.98618	1.48306
GO:0071837	HMG box domain binding	2	258	23	20728	0.0328804	0.140701	6.98618	1.48306
GO:0008060	ARF GTPase activator activity	2	258	23	20728	0.0328804	0.140701	6.98618	1.48306
GO:0000166	nucleotide binding	34	258	1986	20728	0.0351453	0.140701	1.37543	1.45413
GO:0035255	ionotropic glutamate receptor binding	2	258	24	20728	0.0355805	0.140701	6.69509	1.44879
GO:0042562	hormone binding	2	258	24	20728	0.0355805	0.140701	6.69509	1.44879
GO:0005083	small GTPase regulator activity	2	258	24	20728	0.0355805	0.140701	6.69509	1.44879
GO:0016829	lyase activity	5	258	146	20728	0.0360978	0.140701	2.75141	1.44252
GO:0001161	intronic transcription regulatory region sequence-specific DNA binding	1	258	3	20728	0.0368797	0.140701	26.7804	1.43321
GO:0004517	nitric-oxide synthase activity	1	258	3	20728	0.0368797	0.140701	26.7804	1.43321
GO:0004351	glutamate decarboxylase activity	1	258	3	20728	0.0368797	0.140701	26.7804	1.43321
GO:0016015	morphogen activity	1	258	3	20728	0.0368797	0.140701	26.7804	1.43321
GO:0086008	voltage-gated potassium channel activity involved in cardiac muscle cell action potential repolarization	1	258	3	20728	0.0368797	0.140701	26.7804	1.43321
GO:0032767	copper-dependent protein binding	1	258	3	20728	0.0368797	0.140701	26.7804	1.43321
GO:0008475	procollagen-lysine 5-dioxygenase activity	1	258	3	20728	0.0368797	0.140701	26.7804	1.43321
GO:0034618	arginine binding	1	258	3	20728	0.0368797	0.140701	26.7804	1.43321
GO:0034617	tetrahydrobiopterin binding	1	258	3	20728	0.0368797	0.140701	26.7804	1.43321
GO:0042392	sphingosine-1-phosphate phosphatase activity	1	258	3	20728	0.0368797	0.140701	26.7804	1.43321
GO:0010997	anaphase-promoting complex binding	1	258	3	20728	0.0368797	0.140701	26.7804	1.43321
GO:0008332	low voltage-gated calcium channel activity	1	258	3	20728	0.0368797	0.140701	26.7804	1.43321
GO:0005094	Rho GDP-dissociation inhibitor activity	1	258	3	20728	0.0368797	0.140701	26.7804	1.43321
GO:0003829	beta-1,3-galactosyl-O-glycosyl-glycoprotein beta-1,6-N-acetylglucosaminyltransferase activity	1	258	3	20728	0.0368797	0.140701	26.7804	1.43321
GO:0050508	glucuronosyl-N-acetylglucosaminyl-proteoglycan 4-alpha-N-acetylglucosaminyltransferase activity	1	258	3	20728	0.0368797	0.140701	26.7804	1.43321
GO:0004800	thyroxine 5'-deiodinase activity	1	258	3	20728	0.0368797	0.140701	26.7804	1.43321
GO:0046872	metal ion binding	53	258	3374	20728	0.0403196	0.151768	1.26203	1.39448
GO:0008138	protein tyrosine/serine/threonine phosphatase activity	3	258	61	20728	0.0404493	0.151768	3.9512	1.39309
GO:0030507	spectrin binding	2	258	27	20728	0.0441663	0.164357	5.95119	1.35491
GO:0051434	BH3 domain binding	1	258	4	20728	0.0488693	0.169364	20.0853	1.31096
GO:0004647	phosphoserine phosphatase activity	1	258	4	20728	0.0488693	0.169364	20.0853	1.31096
GO:0015272	ATP-activated inward rectifier potassium channel activity	1	258	4	20728	0.0488693	0.169364	20.0853	1.31096
GO:0031750	D3 dopamine receptor binding	1	258	4	20728	0.0488693	0.169364	20.0853	1.31096
GO:0051380	norepinephrine binding	1	258	4	20728	0.0488693	0.169364	20.0853	1.31096
GO:0005173	stem cell factor receptor binding	1	258	4	20728	0.0488693	0.169364	20.0853	1.31096
GO:0031694	alpha-2A adrenergic receptor binding	1	258	4	20728	0.0488693	0.169364	20.0853	1.31096
GO:0030291	protein serine/threonine kinase inhibitor activity	1	258	4	20728	0.0488693	0.169364	20.0853	1.31096
GO:0046582	Rap GTPase activator activity	1	258	4	20728	0.0488693	0.169364	20.0853	1.31096
GO:0046982	protein heterodimerization activity	11	258	501	20728	0.0498386	0.171414	1.76398	1.30243
GO:0019894	kinesin binding	2	258	29	20728	0.0502708	0.171601	5.54076	1.29868
GO:0005544	calcium-dependent phospholipid binding	2	258	30	20728	0.0534304	0.179684	5.35607	1.27221
GO:0004864	protein phosphatase inhibitor activity	2	258	30	20728	0.0534304	0.179684	5.35607	1.27221
GO:0031625	ubiquitin protein ligase binding	6	258	218	20728	0.0556774	0.18375	2.21122	1.25432
GO:0005085	guanyl-nucleotide exchange factor activity	5	258	166	20728	0.0569126	0.18375	2.41991	1.24479
GO:0051427	hormone receptor binding	1	258	5	20728	0.0607103	0.18375	16.0682	1.21674
GO:0005534	galactose binding	1	258	5	20728	0.0607103	0.18375	16.0682	1.21674
GO:0004332	fructose-bisphosphate aldolase activity	1	258	5	20728	0.0607103	0.18375	16.0682	1.21674
GO:0086006	voltage-gated sodium channel activity involved in cardiac muscle cell action potential	1	258	5	20728	0.0607103	0.18375	16.0682	1.21674
GO:0005007	fibroblast growth factor-activated receptor activity	1	258	5	20728	0.0607103	0.18375	16.0682	1.21674
GO:0044323	retinoic acid-responsive element binding	1	258	5	20728	0.0607103	0.18375	16.0682	1.21674
GO:0017034	Rap guanyl-nucleotide exchange factor activity	1	258	5	20728	0.0607103	0.18375	16.0682	1.21674
GO:0046934	phosphatidylinositol-4,5-bisphosphate 3-kinase activity	1	258	5	20728	0.0607103	0.18375	16.0682	1.21674
GO:0035662	Toll-like receptor 4 binding	1	258	5	20728	0.0607103	0.18375	16.0682	1.21674
GO:0001642	group III metabotropic glutamate receptor activity	1	258	5	20728	0.0607103	0.18375	16.0682	1.21674
GO:0035591	signaling adaptor activity	1	258	5	20728	0.0607103	0.18375	16.0682	1.21674
GO:0008093	cytoskeletal adaptor activity	1	258	5	20728	0.0607103	0.18375	16.0682	1.21674
GO:0032184	SUMO polymer binding	1	258	5	20728	0.0607103	0.18375	16.0682	1.21674
GO:0005089	Rho guanyl-nucleotide exchange factor activity	3	258	73	20728	0.0628212	0.18888	3.30169	1.20189
GO:0005496	steroid binding	2	258	33	20728	0.0633115	0.189101	4.86916	1.19852
GO:0048365	Rac GTPase binding	2	258	34	20728	0.0667322	0.19673	4.72595	1.17566
GO:0017048	Rho GTPase binding	2	258	34	20728	0.0667322	0.19673	4.72595	1.17566
GO:0048487	beta-tubulin binding	2	258	35	20728	0.070213	0.201666	4.59092	1.15358
GO:0036122	BMP binding	1	258	6	20728	0.0724044	0.201666	13.3902	1.14024
GO:0005114	type II transforming growth factor beta receptor binding	1	258	6	20728	0.0724044	0.201666	13.3902	1.14024
GO:0051379	epinephrine binding	1	258	6	20728	0.0724044	0.201666	13.3902	1.14024
GO:0019871	sodium channel inhibitor activity	1	258	6	20728	0.0724044	0.201666	13.3902	1.14024
GO:0031730	CCR5 chemokine receptor binding	1	258	6	20728	0.0724044	0.201666	13.3902	1.14024
GO:0004703	G-protein coupled receptor kinase activity	1	258	6	20728	0.0724044	0.201666	13.3902	1.14024
GO:0000155	phosphorelay sensor kinase activity	1	258	6	20728	0.0724044	0.201666	13.3902	1.14024
GO:0043184	vascular endothelial growth factor receptor 2 binding	1	258	6	20728	0.0724044	0.201666	13.3902	1.14024
GO:0001102	RNA polymerase II activating transcription factor binding	2	258	36	20728	0.0737518	0.204167	4.46339	1.13223
GO:0016740	transferase activity	26	258	1553	20728	0.0753925	0.207444	1.34505	1.12267
GO:0019838	growth factor binding	2	258	37	20728	0.0773467	0.211539	4.34276	1.11156
GO:0035014	phosphatidylinositol 3-kinase regulator activity	1	258	7	20728	0.0839534	0.220317	11.4773	1.07596
GO:0035005	1-phosphatidylinositol-4-phosphate 3-kinase activity	1	258	7	20728	0.0839534	0.220317	11.4773	1.07596
GO:0030306	ADP-ribosylation factor binding	1	258	7	20728	0.0839534	0.220317	11.4773	1.07596
GO:0050291	sphingosine N-acyltransferase activity	1	258	7	20728	0.0839534	0.220317	11.4773	1.07596
GO:0008889	glycerophosphodiester phosphodiesterase activity	1	258	7	20728	0.0839534	0.220317	11.4773	1.07596
GO:0035925	mRNA 3'-UTR AU-rich region binding	1	258	7	20728	0.0839534	0.220317	11.4773	1.07596
GO:0005092	GDP-dissociation inhibitor activity	1	258	7	20728	0.0839534	0.220317	11.4773	1.07596
GO:0005245	voltage-gated calcium channel activity	2	258	39	20728	0.0846971	0.220412	4.12006	1.07213
GO:0005262	calcium channel activity	3	258	83	20728	0.0849605	0.220412	2.90389	1.07078
GO:0044325	ion channel binding	3	258	84	20728	0.0873356	0.225286	2.86932	1.05881
GO:0008022	protein C-terminus binding	5	258	190	20728	0.089338	0.229149	2.11424	1.04896
GO:0004438	phosphatidylinositol-3-phosphatase activity	1	258	8	20728	0.0953593	0.231514	10.0426	1.02064
GO:0004571	mannosyl-oligosaccharide 1,2-alpha-mannosidase activity	1	258	8	20728	0.0953593	0.231514	10.0426	1.02064
GO:0031995	insulin-like growth factor II binding	1	258	8	20728	0.0953593	0.231514	10.0426	1.02064
GO:0008603	cAMP-dependent protein kinase regulator activity	1	258	8	20728	0.0953593	0.231514	10.0426	1.02064
GO:0070097	delta-catenin binding	1	258	8	20728	0.0953593	0.231514	10.0426	1.02064
GO:0019215	intermediate filament binding	1	258	8	20728	0.0953593	0.231514	10.0426	1.02064
GO:0031267	small GTPase binding	1	258	8	20728	0.0953593	0.231514	10.0426	1.02064
GO:0003958	NADPH-hemoprotein reductase activity	1	258	8	20728	0.0953593	0.231514	10.0426	1.02064
GO:0004862	cAMP-dependent protein kinase inhibitor activity	1	258	8	20728	0.0953593	0.231514	10.0426	1.02064
GO:0001221	transcription cofactor binding	1	258	8	20728	0.0953593	0.231514	10.0426	1.02064
GO:0030374	ligand-dependent nuclear receptor transcription coactivator activity	2	258	42	20728	0.0960961	0.232062	3.82577	1.01729
GO:0005546	phosphatidylinositol-4,5-bisphosphate binding	2	258	43	20728	0.0999883	0.240184	3.73679	1.00005
GO:0044212	transcription regulatory region DNA binding	5	258	198	20728	0.101898	0.243484	2.02882	0.991833
GO:0030955	potassium ion binding	1	258	9	20728	0.106624	0.24448	8.92679	0.972147
GO:0031994	insulin-like growth factor I binding	1	258	9	20728	0.106624	0.24448	8.92679	0.972147
GO:0019869	chloride channel inhibitor activity	1	258	9	20728	0.106624	0.24448	8.92679	0.972147
GO:0015267	channel activity	1	258	9	20728	0.106624	0.24448	8.92679	0.972147
GO:0019855	calcium channel inhibitor activity	1	258	9	20728	0.106624	0.24448	8.92679	0.972147
GO:0043008	ATP-dependent protein binding	1	258	9	20728	0.106624	0.24448	8.92679	0.972147
GO:0008066	glutamate receptor activity	1	258	9	20728	0.106624	0.24448	8.92679	0.972147
GO:0004935	adrenergic receptor activity	1	258	9	20728	0.106624	0.24448	8.92679	0.972147
GO:0001227	RNA polymerase II transcription regulatory region sequence-specific DNA binding transcription factor activity involved in negative regulation of transcription	2	258	45	20728	0.107901	0.246166	3.57071	0.966975
GO:0017137	Rab GTPase binding	3	258	93	20728	0.109921	0.24952	2.59165	0.95892
GO:0097110	scaffold protein binding	2	258	47	20728	0.115974	0.255547	3.41877	0.93564
GO:0032403	protein complex binding	7	258	328	20728	0.116481	0.255547	1.7146	0.933745
GO:0001012	RNA polymerase II regulatory region DNA binding	1	258	10	20728	0.117748	0.255547	8.03411	0.929046
GO:0009881	photoreceptor activity	1	258	10	20728	0.117748	0.255547	8.03411	0.929046
GO:0030215	semaphorin receptor binding	1	258	10	20728	0.117748	0.255547	8.03411	0.929046
GO:0005088	Ras guanyl-nucleotide exchange factor activity	1	258	10	20728	0.117748	0.255547	8.03411	0.929046
GO:0017154	semaphorin receptor activity	1	258	10	20728	0.117748	0.255547	8.03411	0.929046
GO:0034713	type I transforming growth factor beta receptor binding	1	258	10	20728	0.117748	0.255547	8.03411	0.929046
GO:0035240	dopamine binding	1	258	10	20728	0.117748	0.255547	8.03411	0.929046
GO:0042802	identical protein binding	11	258	588	20728	0.118204	0.255547	1.50298	0.927366
GO:0005509	calcium ion binding	12	258	657	20728	0.120292	0.258828	1.46742	0.919762
GO:0051400	BH domain binding	1	258	11	20728	0.128735	0.27311	7.30374	0.890304
GO:0016303	1-phosphatidylinositol-3-kinase activity	1	258	11	20728	0.128735	0.27311	7.30374	0.890304
GO:0044548	S100 protein binding	1	258	11	20728	0.128735	0.27311	7.30374	0.890304
GO:0000979	RNA polymerase II core promoter sequence-specific DNA binding	2	258	51	20728	0.13255	0.278601	3.15063	0.87762
GO:0031490	chromatin DNA binding	2	258	51	20728	0.13255	0.278601	3.15063	0.87762
GO:0030674	protein binding, bridging	2	258	52	20728	0.136775	0.285458	3.09004	0.863993
GO:0050321	tau-protein kinase activity	1	258	12	20728	0.139585	0.285458	6.69509	0.855161
GO:0048156	tau protein binding	1	258	12	20728	0.139585	0.285458	6.69509	0.855161
GO:0043539	protein serine/threonine kinase activator activity	1	258	12	20728	0.139585	0.285458	6.69509	0.855161
GO:0005161	platelet-derived growth factor receptor binding	1	258	12	20728	0.139585	0.285458	6.69509	0.855161
GO:0008157	protein phosphatase 1 binding	1	258	12	20728	0.139585	0.285458	6.69509	0.855161
GO:0008144	drug binding	3	258	105	20728	0.14306	0.291252	2.29546	0.844482
GO:0016595	glutamate binding	1	258	13	20728	0.150301	0.299283	6.18008	0.823038
GO:0030676	Rac guanyl-nucleotide exchange factor activity	1	258	13	20728	0.150301	0.299283	6.18008	0.823038
GO:0017160	Ral GTPase binding	1	258	13	20728	0.150301	0.299283	6.18008	0.823038
GO:0043422	protein kinase B binding	1	258	13	20728	0.150301	0.299283	6.18008	0.823038
GO:0034236	protein kinase A catalytic subunit binding	1	258	13	20728	0.150301	0.299283	6.18008	0.823038
GO:0000989	transcription factor binding transcription factor activity	1	258	14	20728	0.160884	0.314833	5.73865	0.793488
GO:0008574	plus-end-directed microtubule motor activity	1	258	14	20728	0.160884	0.314833	5.73865	0.793488
GO:0004707	MAP kinase activity	1	258	14	20728	0.160884	0.314833	5.73865	0.793488
GO:0010181	FMN binding	1	258	14	20728	0.160884	0.314833	5.73865	0.793488
GO:0002039	p53 binding	2	258	58	20728	0.162697	0.317015	2.77038	0.78862
GO:0017124	SH3 domain binding	3	258	114	20728	0.169806	0.325465	2.11424	0.770047
GO:0035259	glucocorticoid receptor binding	1	258	15	20728	0.171335	0.325465	5.35607	0.766153
GO:0004143	diacylglycerol kinase activity	1	258	15	20728	0.171335	0.325465	5.35607	0.766153
GO:0005123	death receptor binding	1	258	15	20728	0.171335	0.325465	5.35607	0.766153
GO:0005024	transforming growth factor beta-activated receptor activity	1	258	15	20728	0.171335	0.325465	5.35607	0.766153
GO:0000982	RNA polymerase II core promoter proximal region sequence-specific DNA binding transcription factor activity	1	258	15	20728	0.171335	0.325465	5.35607	0.766153
GO:0008092	cytoskeletal protein binding	2	258	61	20728	0.175968	0.332873	2.63413	0.754566
GO:0005246	calcium channel regulator activity	1	258	16	20728	0.181657	0.340795	5.02132	0.740748
GO:0005099	Ras GTPase activator activity	1	258	16	20728	0.181657	0.340795	5.02132	0.740748
GO:0016853	isomerase activity	3	258	119	20728	0.185244	0.346094	2.02541	0.732256
GO:0001190	RNA polymerase II transcription factor binding transcription factor activity involved in positive regulation of transcription	1	258	17	20728	0.191851	0.352632	4.72595	0.717037
GO:0031434	mitogen-activated protein kinase kinase binding	1	258	17	20728	0.191851	0.352632	4.72595	0.717037
GO:0017091	AU-rich element binding	1	258	17	20728	0.191851	0.352632	4.72595	0.717037
GO:0003951	NAD+ kinase activity	1	258	17	20728	0.191851	0.352632	4.72595	0.717037
GO:0051087	chaperone binding	2	258	65	20728	0.193911	0.353341	2.47203	0.712398
GO:0048306	calcium-dependent protein binding	2	258	65	20728	0.193911	0.353341	2.47203	0.712398
GO:0005198	structural molecule activity	4	258	183	20728	0.194571	0.353341	1.75609	0.710922
GO:0008134	transcription factor binding	6	258	314	20728	0.198368	0.354415	1.53518	0.702528
GO:0003777	microtubule motor activity	2	258	66	20728	0.198433	0.354415	2.43458	0.702385
GO:0050431	transforming growth factor beta binding	1	258	18	20728	0.201918	0.354415	4.46339	0.694825
GO:0005528	FK506 binding	1	258	18	20728	0.201918	0.354415	4.46339	0.694825
GO:0005234	extracellular-glutamate-gated ion channel activity	1	258	18	20728	0.201918	0.354415	4.46339	0.694825
GO:0015075	ion transmembrane transporter activity	1	258	18	20728	0.201918	0.354415	4.46339	0.694825
GO:0071889	14-3-3 protein binding	1	258	18	20728	0.201918	0.354415	4.46339	0.694825
GO:0004970	ionotropic glutamate receptor activity	1	258	18	20728	0.201918	0.354415	4.46339	0.694825
GO:0004872	receptor activity	4	258	186	20728	0.202207	0.354415	1.72777	0.694204
GO:0000980	RNA polymerase II distal enhancer sequence-specific DNA binding	2	258	67	20728	0.202969	0.354415	2.39824	0.692571
GO:0051082	unfolded protein binding	2	258	68	20728	0.207516	0.356598	2.36297	0.682949
GO:0061630	ubiquitin protein ligase activity	3	258	127	20728	0.210656	0.356598	1.89782	0.676426
GO:0008289	lipid binding	5	258	254	20728	0.210704	0.356598	1.58152	0.676328
GO:0001158	enhancer sequence-specific DNA binding	1	258	19	20728	0.21186	0.356598	4.22848	0.673951
GO:0070273	phosphatidylinositol-4-phosphate binding	1	258	19	20728	0.21186	0.356598	4.22848	0.673951
GO:0004683	calmodulin-dependent protein kinase activity	1	258	19	20728	0.21186	0.356598	4.22848	0.673951
GO:0005248	voltage-gated sodium channel activity	1	258	19	20728	0.21186	0.356598	4.22848	0.673951
GO:0030675	Rac GTPase activator activity	1	258	19	20728	0.21186	0.356598	4.22848	0.673951
GO:0046965	retinoid X receptor binding	1	258	19	20728	0.21186	0.356598	4.22848	0.673951
GO:0008013	beta-catenin binding	2	258	69	20728	0.212073	0.356598	2.32873	0.673514
GO:0050998	nitric-oxide synthase binding	1	258	20	20728	0.221679	0.368653	4.01705	0.654275
GO:0005539	glycosaminoglycan binding	1	258	20	20728	0.221679	0.368653	4.01705	0.654275
GO:0031418	L-ascorbic acid binding	1	258	20	20728	0.221679	0.368653	4.01705	0.654275
GO:0030506	ankyrin binding	1	258	21	20728	0.231376	0.381981	3.82577	0.635681
GO:0005070	SH3/SH2 adaptor activity	1	258	21	20728	0.231376	0.381981	3.82577	0.635681
GO:0008270	zinc ion binding	17	258	1124	20728	0.23719	0.390161	1.21512	0.624903
GO:0031435	mitogen-activated protein kinase kinase kinase binding	1	258	22	20728	0.240953	0.390688	3.65187	0.618068
GO:0005057	receptor signaling protein activity	1	258	22	20728	0.240953	0.390688	3.65187	0.618068
GO:0017080	sodium channel regulator activity	1	258	22	20728	0.240953	0.390688	3.65187	0.618068
GO:0008047	enzyme activator activity	1	258	22	20728	0.240953	0.390688	3.65187	0.618068
GO:0035091	phosphatidylinositol binding	2	258	77	20728	0.248808	0.397769	2.08678	0.604135
GO:0035257	nuclear hormone receptor binding	1	258	23	20728	0.250411	0.397769	3.49309	0.601347
GO:0017134	fibroblast growth factor binding	1	258	23	20728	0.250411	0.397769	3.49309	0.601347
GO:0008536	Ran GTPase binding	1	258	23	20728	0.250411	0.397769	3.49309	0.601347
GO:0043015	gamma-tubulin binding	1	258	23	20728	0.250411	0.397769	3.49309	0.601347
GO:0005506	iron ion binding	4	258	206	20728	0.255117	0.397769	1.56002	0.59326
GO:0005504	fatty acid binding	1	258	24	20728	0.259751	0.397769	3.34755	0.585442
GO:0035035	histone acetyltransferase binding	1	258	24	20728	0.259751	0.397769	3.34755	0.585442
GO:0050699	WW domain binding	1	258	24	20728	0.259751	0.397769	3.34755	0.585442
GO:0052867	phosphatidylinositol-1,4,5-trisphosphate 5-phosphatase activity	1	258	25	20728	0.268976	0.397769	3.21364	0.570287
GO:0052745	inositol phosphate phosphatase activity	1	258	25	20728	0.268976	0.397769	3.21364	0.570287
GO:0043813	phosphatidylinositol-3,5-bisphosphate 5-phosphatase activity	1	258	25	20728	0.268976	0.397769	3.21364	0.570287
GO:0043812	phosphatidylinositol-4-phosphate phosphatase activity	1	258	25	20728	0.268976	0.397769	3.21364	0.570287
GO:0052829	inositol-1,3,4-trisphosphate 1-phosphatase activity	1	258	25	20728	0.268976	0.397769	3.21364	0.570287
GO:0052828	inositol-3,4-bisphosphate 4-phosphatase activity	1	258	25	20728	0.268976	0.397769	3.21364	0.570287
GO:0052825	inositol-1,3,4,5,6-pentakisphosphate 1-phosphatase activity	1	258	25	20728	0.268976	0.397769	3.21364	0.570287
GO:0052830	inositol-1,3,4,6-tetrakisphosphate 6-phosphatase activity	1	258	25	20728	0.268976	0.397769	3.21364	0.570287
GO:0052831	inositol-1,3,4,6-tetrakisphosphate 1-phosphatase activity	1	258	25	20728	0.268976	0.397769	3.21364	0.570287
GO:1990003	IDP phosphatase activity	1	258	25	20728	0.268976	0.397769	3.21364	0.570287
GO:0008969	phosphohistidine phosphatase activity	1	258	25	20728	0.268976	0.397769	3.21364	0.570287
GO:0043726	5-amino-6-(5-phosphoribitylamino)uracil phosphatase activity	1	258	25	20728	0.268976	0.397769	3.21364	0.570287
GO:0030552	cAMP binding	1	258	25	20728	0.268976	0.397769	3.21364	0.570287
GO:0031593	polyubiquitin binding	1	258	25	20728	0.268976	0.397769	3.21364	0.570287
GO:0017161	inositol-1,3,4-trisphosphate 4-phosphatase activity	1	258	25	20728	0.268976	0.397769	3.21364	0.570287
GO:0031683	G-protein beta/gamma-subunit complex binding	1	258	25	20728	0.268976	0.397769	3.21364	0.570287
GO:0019198	transmembrane receptor protein phosphatase activity	1	258	25	20728	0.268976	0.397769	3.21364	0.570287
GO:0019178	NADP phosphatase activity	1	258	25	20728	0.268976	0.397769	3.21364	0.570287
GO:0042826	histone deacetylase binding	2	258	83	20728	0.276501	0.402073	1.93593	0.558304
GO:0001228	RNA polymerase II transcription regulatory region sequence-specific DNA binding transcription factor activity involved in positive regulation of transcription	2	258	83	20728	0.276501	0.402073	1.93593	0.558304
GO:0016312	inositol bisphosphate phosphatase activity	1	258	26	20728	0.278086	0.402073	3.09004	0.555821
GO:0030487	inositol-4,5-bisphosphate 5-phosphatase activity	1	258	26	20728	0.278086	0.402073	3.09004	0.555821
GO:0008579	JUN kinase phosphatase activity	1	258	26	20728	0.278086	0.402073	3.09004	0.555821
GO:0030352	inositol-1,4,5,6-tetrakisphosphate 6-phosphatase activity	1	258	26	20728	0.278086	0.402073	3.09004	0.555821
GO:0030351	inositol-1,3,4,5,6-pentakisphosphate 3-phosphatase activity	1	258	26	20728	0.278086	0.402073	3.09004	0.555821
GO:0050681	androgen receptor binding	1	258	27	20728	0.287083	0.408575	2.9756	0.541993
GO:0052629	phosphatidylinositol-3,5-bisphosphate 3-phosphatase activity	1	258	27	20728	0.287083	0.408575	2.9756	0.541993
GO:0000987	core promoter proximal region sequence-specific DNA binding	1	258	27	20728	0.287083	0.408575	2.9756	0.541993
GO:0043548	phosphatidylinositol 3-kinase binding	1	258	27	20728	0.287083	0.408575	2.9756	0.541993
GO:0051059	NF-kappaB binding	1	258	27	20728	0.287083	0.408575	2.9756	0.541993
GO:0003682	chromatin binding	7	258	431	20728	0.291146	0.413064	1.30484	0.535889
GO:0008330	protein tyrosine/threonine phosphatase activity	1	258	28	20728	0.295968	0.417296	2.86932	0.528755
GO:0032266	phosphatidylinositol-3-phosphate binding	1	258	28	20728	0.295968	0.417296	2.86932	0.528755
GO:0045296	cadherin binding	1	258	29	20728	0.304743	0.425702	2.77038	0.516067
GO:0015171	amino acid transmembrane transporter activity	1	258	29	20728	0.304743	0.425702	2.77038	0.516067
GO:0004712	protein serine/threonine/tyrosine kinase activity	1	258	29	20728	0.304743	0.425702	2.77038	0.516067
GO:0017112	Rab guanyl-nucleotide exchange factor activity	1	258	30	20728	0.313409	0.426812	2.67804	0.503889
GO:0043774	coenzyme F420-2 alpha-glutamyl ligase activity	4	258	229	20728	0.318864	0.426812	1.40334	0.496394
GO:0043773	coenzyme F420-0 gamma-glutamyl ligase activity	4	258	229	20728	0.318864	0.426812	1.40334	0.496394
GO:0008766	UDP-N-acetylmuramoylalanyl-D-glutamyl-2,6-diaminopimelate-D-alanyl-D-alanine ligase activity	4	258	229	20728	0.318864	0.426812	1.40334	0.496394
GO:0070739	protein-glutamic acid ligase activity	4	258	229	20728	0.318864	0.426812	1.40334	0.496394
GO:0070737	protein-glycine ligase activity, elongating	4	258	229	20728	0.318864	0.426812	1.40334	0.496394
GO:0070738	tubulin-glycine ligase activity	4	258	229	20728	0.318864	0.426812	1.40334	0.496394
GO:0070735	protein-glycine ligase activity	4	258	229	20728	0.318864	0.426812	1.40334	0.496394
GO:0070736	protein-glycine ligase activity, initiating	4	258	229	20728	0.318864	0.426812	1.40334	0.496394
GO:0018169	ribosomal S6-glutamic acid ligase activity	4	258	229	20728	0.318864	0.426812	1.40334	0.496394
GO:0070740	tubulin-glutamic acid ligase activity	4	258	230	20728	0.321675	0.426812	1.39724	0.492582
GO:0043531	ADP binding	1	258	31	20728	0.321967	0.426812	2.59165	0.492189
GO:0005272	sodium channel activity	1	258	31	20728	0.321967	0.426812	2.59165	0.492189
GO:0005154	epidermal growth factor receptor binding	1	258	31	20728	0.321967	0.426812	2.59165	0.492189
GO:0052771	coenzyme F390-G hydrolase activity	1	258	31	20728	0.321967	0.426812	2.59165	0.492189
GO:0052770	coenzyme F390-A hydrolase activity	1	258	31	20728	0.321967	0.426812	2.59165	0.492189
GO:0004860	protein kinase inhibitor activity	1	258	31	20728	0.321967	0.426812	2.59165	0.492189
GO:0005178	integrin binding	2	258	93	20728	0.322459	0.426812	1.72777	0.491525
GO:0003713	transcription coactivator activity	3	258	162	20728	0.327791	0.432306	1.4878	0.484404
GO:0004693	cyclin-dependent protein serine/threonine kinase activity	1	258	32	20728	0.330419	0.432306	2.51066	0.480935
GO:0042169	SH2 domain binding	1	258	32	20728	0.330419	0.432306	2.51066	0.480935
GO:0001104	RNA polymerase II transcription cofactor activity	1	258	32	20728	0.330419	0.432306	2.51066	0.480935
GO:0051721	protein phosphatase 2A binding	1	258	33	20728	0.338766	0.439428	2.43458	0.4701
GO:0015485	cholesterol binding	1	258	33	20728	0.338766	0.439428	2.43458	0.4701
GO:0043022	ribosome binding	1	258	33	20728	0.338766	0.439428	2.43458	0.4701
GO:0005547	phosphatidylinositol-3,4,5-trisphosphate binding	1	258	34	20728	0.34701	0.448839	2.36297	0.459658
GO:0004725	protein tyrosine phosphatase activity	2	258	99	20728	0.349705	0.45104	1.62305	0.456298
GO:0002020	protease binding	2	258	100	20728	0.354212	0.452917	1.60682	0.450736
GO:0004407	histone deacetylase activity	1	258	35	20728	0.355151	0.452917	2.29546	0.449587
GO:0000976	transcription regulatory region sequence-specific DNA binding	1	258	35	20728	0.355151	0.452917	2.29546	0.449587
GO:0003923	GPI-anchor transamidase activity	1	258	35	20728	0.355151	0.452917	2.29546	0.449587
GO:0005484	SNAP receptor activity	1	258	36	20728	0.363191	0.461873	2.2317	0.439865
GO:0016706	oxidoreductase activity, acting on paired donors, with incorporation or reduction of molecular oxygen, 2-oxoglutarate as one donor, and incorporation of one atom each of oxygen into both donors	1	258	37	20728	0.371131	0.470091	2.17138	0.430473
GO:0001046	core promoter sequence-specific DNA binding	1	258	38	20728	0.378972	0.470091	2.11424	0.421392
GO:0052693	epoxyqueuosine reductase activity	1	258	38	20728	0.378972	0.470091	2.11424	0.421392
GO:0008748	N-ethylmaleimide reductase activity	1	258	38	20728	0.378972	0.470091	2.11424	0.421392
GO:0043883	malolactic enzyme activity	1	258	38	20728	0.378972	0.470091	2.11424	0.421392
GO:0043826	sulfur oxygenase reductase activity	1	258	38	20728	0.378972	0.470091	2.11424	0.421392
GO:0017017	MAP kinase tyrosine/serine/threonine phosphatase activity	1	258	38	20728	0.378972	0.470091	2.11424	0.421392
GO:0043738	reduced coenzyme F420 dehydrogenase activity	1	258	38	20728	0.378972	0.470091	2.11424	0.421392
GO:0004722	protein serine/threonine phosphatase activity	1	258	38	20728	0.378972	0.470091	2.11424	0.421392
GO:0043914	NADPH:sulfur oxidoreductase activity	1	258	39	20728	0.386716	0.475797	2.06003	0.412607
GO:0050661	NADP binding	1	258	39	20728	0.386716	0.475797	2.06003	0.412607
GO:0003755	peptidyl-prolyl cis-trans isomerase activity	1	258	39	20728	0.386716	0.475797	2.06003	0.412607
GO:0008009	chemokine activity	1	258	40	20728	0.394364	0.483896	2.00853	0.404102
GO:0016773	phosphotransferase activity, alcohol group as acceptor	1	258	41	20728	0.401917	0.491045	1.95954	0.395863
GO:0042803	protein homodimerization activity	10	258	717	20728	0.402354	0.491045	1.12052	0.395392
GO:0032947	protein complex scaffold	1	258	42	20728	0.409376	0.492337	1.91288	0.387877
GO:0015631	tubulin binding	1	258	43	20728	0.416743	0.492337	1.8684	0.380132
GO:0044822	poly(A) RNA binding	15	258	1117	20728	0.418887	0.492337	1.07889	0.377903
GO:0050698	proteoglycan sulfotransferase activity	1	258	44	20728	0.424017	0.492337	1.82593	0.372616
GO:0018725	trans-3,4-dihydrodiolphenanthrene sulfotransferase activity	1	258	44	20728	0.424017	0.492337	1.82593	0.372616
GO:0018724	4-phenanthrol sulfotransferase activity	1	258	44	20728	0.424017	0.492337	1.82593	0.372616
GO:0018727	2-phenanthrol sulfotransferase activity	1	258	44	20728	0.424017	0.492337	1.82593	0.372616
GO:0018726	9-phenanthrol sulfotransferase activity	1	258	44	20728	0.424017	0.492337	1.82593	0.372616
GO:0018721	trans-9R,10R-dihydrodiolphenanthrene sulfotransferase activity	1	258	44	20728	0.424017	0.492337	1.82593	0.372616
GO:0018723	3-phenanthrol sulfotransferase activity	1	258	44	20728	0.424017	0.492337	1.82593	0.372616
GO:0018722	1-phenanthrol sulfotransferase activity	1	258	44	20728	0.424017	0.492337	1.82593	0.372616
GO:0004394	heparan sulfate 2-O-sulfotransferase activity	1	258	44	20728	0.424017	0.492337	1.82593	0.372616
GO:0016232	HNK-1 sulfotransferase activity	1	258	44	20728	0.424017	0.492337	1.82593	0.372616
GO:0034930	1-hydroxypyrene sulfotransferase activity	1	258	44	20728	0.424017	0.492337	1.82593	0.372616
GO:0019111	phenanthrol sulfotransferase activity	1	258	44	20728	0.424017	0.492337	1.82593	0.372616
GO:0017095	heparan sulfate 6-O-sulfotransferase activity	1	258	44	20728	0.424017	0.492337	1.82593	0.372616
GO:0001517	N-acetylglucosamine 6-O-sulfotransferase activity	1	258	44	20728	0.424017	0.492337	1.82593	0.372616
GO:0080131	hydroxyjasmonate sulfotransferase activity	1	258	44	20728	0.424017	0.492337	1.82593	0.372616
GO:0051922	cholesterol sulfotransferase activity	1	258	44	20728	0.424017	0.492337	1.82593	0.372616
GO:0019899	enzyme binding	5	258	344	20728	0.426808	0.494313	1.16775	0.369768
GO:0030145	manganese ion binding	1	258	45	20728	0.431202	0.495609	1.78536	0.365319
GO:0005097	Rab GTPase activator activity	1	258	45	20728	0.431202	0.495609	1.78536	0.365319
GO:0004715	non-membrane spanning protein tyrosine kinase activity	1	258	45	20728	0.431202	0.495609	1.78536	0.365319
GO:0016705	oxidoreductase activity, acting on paired donors, with incorporation or reduction of molecular oxygen	2	258	119	20728	0.43733	0.499967	1.35027	0.359191
GO:0016881	acid-amino acid ligase activity	1	258	46	20728	0.438297	0.499967	1.74655	0.358231
GO:0050694	galactose 3-O-sulfotransferase activity	1	258	46	20728	0.438297	0.499967	1.74655	0.358231
GO:0016887	ATPase activity	3	258	196	20728	0.441845	0.502751	1.22971	0.35473
GO:0001537	N-acetylgalactosamine 4-O-sulfotransferase activity	1	258	47	20728	0.445304	0.50542	1.70938	0.351343
GO:0043621	protein self-association	1	258	48	20728	0.452224	0.510721	1.67377	0.344646
GO:0008301	DNA binding, bending	1	258	48	20728	0.452224	0.510721	1.67377	0.344646
GO:0004713	protein tyrosine kinase activity	2	258	123	20728	0.454102	0.51157	1.30636	0.342846
GO:0016791	phosphatase activity	2	258	124	20728	0.458251	0.513331	1.29582	0.338896
GO:0016758	transferase activity, transferring hexosyl groups	1	258	49	20728	0.459058	0.513331	1.63961	0.338132
GO:0051219	phosphoprotein binding	1	258	49	20728	0.459058	0.513331	1.63961	0.338132
GO:0043130	ubiquitin binding	1	258	50	20728	0.465807	0.519598	1.60682	0.331794
GO:0008081	phosphoric diester hydrolase activity	1	258	52	20728	0.479055	0.533066	1.54502	0.319615
GO:0043765	T/G mismatch-specific endonuclease activity	1	258	53	20728	0.485555	0.533758	1.51587	0.313762
GO:0044824	retroviral 3' processing activity	1	258	53	20728	0.485555	0.533758	1.51587	0.313762
GO:0005080	protein kinase C binding	1	258	53	20728	0.485555	0.533758	1.51587	0.313762
GO:0008146	sulfotransferase activity	1	258	53	20728	0.485555	0.533758	1.51587	0.313762
GO:0004702	receptor signaling protein serine/threonine kinase activity	1	258	53	20728	0.485555	0.533758	1.51587	0.313762
GO:0005125	cytokine activity	3	258	212	20728	0.493055	0.540694	1.1369	0.307104
GO:0005518	collagen binding	1	258	55	20728	0.498315	0.543834	1.46075	0.302496
GO:0004714	transmembrane receptor protein tyrosine kinase activity	1	258	55	20728	0.498315	0.543834	1.46075	0.302496
GO:0008080	N-acetyltransferase activity	1	258	57	20728	0.510759	0.556078	1.40949	0.291784
GO:0008375	acetylglucosaminyltransferase activity	1	258	58	20728	0.516865	0.56138	1.38519	0.286623
GO:0004721	phosphoprotein phosphatase activity	2	258	142	20728	0.529652	0.573895	1.13156	0.276009
GO:0042578	phosphoric ester hydrolase activity	1	258	61	20728	0.534732	0.57802	1.31707	0.271863
GO:0016874	ligase activity	5	258	393	20728	0.542812	0.58536	1.02215	0.265351
GO:0030246	carbohydrate binding	3	258	235	20728	0.562338	0.60498	1.02563	0.250003
GO:0003774	motor activity	1	258	69	20728	0.579225	0.621674	1.16436	0.237152
GO:0050660	flavin adenine dinucleotide binding	1	258	72	20728	0.594795	0.636879	1.11585	0.225633
GO:0003705	RNA polymerase II distal enhancer sequence-specific DNA binding transcription factor activity	1	258	74	20728	0.604854	0.646126	1.08569	0.21835
GO:0051213	dioxygenase activity	1	258	81	20728	0.638142	0.680086	0.991865	0.195083
GO:0020037	heme binding	2	258	175	20728	0.643133	0.683799	0.918184	0.191699
GO:0042277	peptide binding	1	258	88	20728	0.668636	0.709254	0.912967	0.17481
GO:0046983	protein dimerization activity	2	258	188	20728	0.681531	0.721247	0.854692	0.166514
GO:0005525	GTP binding	4	258	372	20728	0.683225	0.721359	0.863883	0.165436
GO:0016798	hydrolase activity, acting on glycosyl bonds	1	258	92	20728	0.684897	0.721446	0.873273	0.164374
GO:0003729	mRNA binding	1	258	99	20728	0.711465	0.747697	0.811526	0.147847
GO:0003676	nucleic acid binding	13	258	1205	20728	0.741282	0.777234	0.86675	0.130016
GO:0015293	symporter activity	1	258	112	20728	0.755025	0.789819	0.717331	0.122039
GO:0016757	transferase activity, transferring glycosyl groups	2	258	226	20728	0.77471	0.807723	0.710983	0.110861
GO:0001078	RNA polymerase II core promoter proximal region sequence-specific DNA binding transcription factor activity involved in negative regulation of transcription	1	258	119	20728	0.775699	0.807723	0.675135	0.110307
GO:0005179	hormone activity	1	258	121	20728	0.78128	0.811673	0.663976	0.107193
GO:0005215	transporter activity	2	258	231	20728	0.785022	0.813699	0.695594	0.105118
GO:0004842	ubiquitin-protein transferase activity	2	258	239	20728	0.800662	0.82802	0.67231	0.0965508
GO:0004497	monooxygenase activity	1	258	132	20728	0.809592	0.835352	0.608645	0.0917339
GO:0004518	nuclease activity	1	258	144	20728	0.836329	0.860983	0.557924	0.0776229
GO:0008083	growth factor activity	1	258	147	20728	0.842407	0.865277	0.546538	0.0744782
GO:0005102	receptor binding	3	258	379	20728	0.853598	0.874793	0.635945	0.0687467
GO:0016746	transferase activity, transferring acyl groups	1	258	173	20728	0.886497	0.905717	0.464399	0.0523225
GO:0003824	catalytic activity	6	258	720	20728	0.887762	0.905717	0.669509	0.0517035
GO:0008236	serine-type peptidase activity	1	258	181	20728	0.897408	0.913505	0.443873	0.04701
GO:0016491	oxidoreductase activity	5	258	647	20728	0.908303	0.922527	0.620874	0.0417692
GO:0004252	serine-type endopeptidase activity	1	258	194	20728	0.912954	0.925181	0.414129	0.0395513
GO:0003723	RNA binding	4	258	711	20728	0.978625	0.989522	0.451989	0.00938387
GO:0008233	peptidase activity	1	258	548	20728	0.999048	1	0.146608	0.000413827
GO:0016787	hydrolase activity	7	258	1640	20728	0.999886	1	0.342919	4.94447e-05
GO:0004871	signal transducer activity	7	258	1844	20728	0.999985	1	0.304982	6.30144e-06
GO:0004930	G-protein coupled receptor activity	4	258	1679	20728	0.999999	1	0.191402	2.9765e-07
GO:0003674	molecular_function	46	258	6820	20728	1	1	0.54189	6.90721e-09
