# Supplementary material for: Cognitive impairment and transcriptomic profile in hippocampus of young mice after multiple neonatal exposures to sevoflurane
Source: Aging (Albany NY). 2019 Oct 3;11(19):8386–417. doi: 10.18632/aging.102326 (PMC6814607; doi:10.18632/aging.102326)
Supplement: Supplementary Table 12 [file aging-11-102326-s002.xlsx]

## Sheet: DownPathway_Result
Supplementary Table 12. All KEGG pathways associated with down-regulated DEGs.
PathwayID	PathwayTerm	DifGene	AllDifGene	GeneInPathway	AllGene	P-Value	FDR	Enrichment	(-log10P)
PATH:04921	Oxytocin signaling pathway	12	87	158	7456	2.42822e-07	3.56949e-05	6.50895	6.61471
PATH:04141	Protein processing in endoplasmic reticulum	11	87	165	7456	2.92375e-06	0.000214896	5.71341	5.53406
PATH:04724	Glutamatergic synapse	9	87	127	7456	1.52043e-05	0.00074501	6.07331	4.81803
PATH:04915	Estrogen signaling pathway	7	87	98	7456	0.000135297	0.00497217	6.12151	3.86871
PATH:04971	Gastric acid secretion	6	87	74	7456	0.000208221	0.00612169	6.94874	3.68148
PATH:04261	Adrenergic signaling in cardiomyocytes	8	87	149	7456	0.000324365	0.00794694	4.6014	3.48897
PATH:05414	Dilated cardiomyopathy	6	87	89	7456	0.000568155	0.0119312	5.77761	3.24553
PATH:05020	Prion diseases	4	87	35	7456	0.000687126	0.0126259	9.79442	3.16296
PATH:04918	Thyroid hormone synthesis	5	87	71	7456	0.00137018	0.0223796	6.03529	2.86322
PATH:04725	Cholinergic synapse	6	87	112	7456	0.00188977	0.0277797	4.59113	2.72359
PATH:04914	Progesterone-mediated oocyte maturation	5	87	85	7456	0.00303914	0.0399408	5.04124	2.51725
PATH:04911	Insulin secretion	5	87	87	7456	0.00336187	0.0399408	4.92535	2.47342
PATH:04727	GABAergic synapse	5	87	88	7456	0.00353218	0.0399408	4.86938	2.45196
PATH:04611	Platelet activation	6	87	130	7456	0.00398811	0.0399872	3.95544	2.39923
PATH:05032	Morphine addiction	5	87	91	7456	0.00408033	0.0399872	4.70885	2.3893
PATH:04068	FoxO signaling pathway	6	87	134	7456	0.00462628	0.0425039	3.83736	2.33477
PATH:05166	HTLV-I infection	9	87	280	7456	0.00514896	0.0429572	2.75468	2.28828
PATH:04713	Circadian entrainment	5	87	97	7456	0.00535513	0.0429572	4.41759	2.27123
PATH:04742	Taste transduction	4	87	62	7456	0.00576654	0.0429572	5.52911	2.23908
PATH:04020	Calcium signaling pathway	7	87	186	7456	0.00584452	0.0429572	3.22531	2.23325
PATH:04970	Salivary secretion	4	87	77	7456	0.0122631	0.0858414	4.45201	1.9114
PATH:04022	cGMP-PKG signaling pathway	6	87	170	7456	0.0141875	0.0947984	3.02475	1.84809
PATH:04540	Gap junction	4	87	87	7456	0.0184822	0.118125	3.94028	1.73325
PATH:05213	Endometrial cancer	3	87	52	7456	0.0224874	0.137736	4.9443	1.64806
PATH:04062	Chemokine signaling pathway	6	87	193	7456	0.0248715	0.146244	2.66428	1.6043
PATH:05221	Acute myeloid leukemia	3	87	57	7456	0.0285665	0.151738	4.51059	1.54414
PATH:00330	Arginine and proline metabolism	3	87	58	7456	0.0298768	0.151738	4.43282	1.52467
PATH:04913	Ovarian steroidogenesis	3	87	58	7456	0.0298768	0.151738	4.43282	1.52467
PATH:04912	GnRH signaling pathway	4	87	101	7456	0.030012	0.151738	3.3941	1.52271
PATH:04723	Retrograde endocannabinoid signaling	4	87	102	7456	0.030967	0.151738	3.36083	1.5091
PATH:04721	Synaptic vesicle cycle	3	87	63	7456	0.0368977	0.172762	4.08101	1.433
PATH:04114	Oocyte meiosis	4	87	110	7456	0.0392518	0.172762	3.11641	1.40614
PATH:04150	mTOR signaling pathway	3	87	65	7456	0.039923	0.172762	3.95544	1.39878
PATH:04015	Rap1 signaling pathway	6	87	216	7456	0.0399586	0.172762	2.38059	1.39839
PATH:04115	p53 signaling pathway	3	87	66	7456	0.0414816	0.174223	3.89551	1.38214
PATH:04710	Circadian rhythm	2	87	30	7456	0.0474083	0.193584	5.71341	1.32415
PATH:05211	Renal cell carcinoma	3	87	71	7456	0.0497276	0.197567	3.62118	1.3034
PATH:04976	Bile secretion	3	87	72	7456	0.0514662	0.199093	3.57088	1.28848
PATH:04750	Inflammatory mediator regulation of TRP channels	4	87	126	7456	0.0592786	0.223435	2.72067	1.2271
PATH:00250	Alanine, aspartate and glutamate metabolism	2	87	37	7456	0.0689095	0.243161	4.63249	1.16172
PATH:04722	Neurotrophin signaling pathway	4	87	133	7456	0.0694746	0.243161	2.57748	1.15817
PATH:04360	Axon guidance	4	87	133	7456	0.0694746	0.243161	2.57748	1.15817
PATH:04210	Apoptosis	3	87	86	7456	0.0787812	0.269322	2.98957	1.10358
PATH:04012	ErbB signaling pathway	3	87	87	7456	0.0809348	0.270396	2.95521	1.09186
PATH:05200	Pathways in cancer	7	87	325	7456	0.0843628	0.273246	1.84587	1.07385
PATH:04910	Insulin signaling pathway	4	87	143	7456	0.0855056	0.273246	2.39723	1.06801
PATH:05161	Hepatitis B	4	87	145	7456	0.0889128	0.278089	2.36417	1.05104
PATH:04510	Focal adhesion	5	87	207	7456	0.0937736	0.287182	2.07008	1.02792
PATH:04010	MAPK signaling pathway	6	87	271	7456	0.0961086	0.288326	1.89744	1.01724
PATH:00600	Sphingolipid metabolism	2	87	48	7456	0.107638	0.307891	3.57088	0.968035
PATH:04310	Wnt signaling pathway	4	87	156	7456	0.108797	0.307891	2.19747	0.963384
PATH:04810	Regulation of actin cytoskeleton	5	87	218	7456	0.110564	0.307891	1.96562	0.956386
PATH:04916	Melanogenesis	3	87	100	7456	0.111147	0.307891	2.57103	0.954103
PATH:04144	Endocytosis	5	87	220	7456	0.113766	0.307891	1.94775	0.943987
PATH:04930	Type II diabetes mellitus	2	87	50	7456	0.115197	0.307891	3.42805	0.938558
PATH:05142	Chagas disease (American trypanosomiasis)	3	87	103	7456	0.118661	0.311486	2.49615	0.925691
PATH:04014	Ras signaling pathway	5	87	227	7456	0.125324	0.32026	1.88769	0.901967
PATH:04972	Pancreatic secretion	3	87	106	7456	0.126361	0.32026	2.4255	0.898386
PATH:05014	Amyotrophic lateral sclerosis (ALS)	2	87	55	7456	0.134652	0.335488	3.11641	0.870788
PATH:04919	Thyroid hormone signaling pathway	3	87	118	7456	0.158837	0.382863	2.17884	0.799048
PATH:00562	Inositol phosphate metabolism	2	87	61	7456	0.158875	0.382863	2.80987	0.798944
PATH:05210	Colorectal cancer	2	87	64	7456	0.171277	0.399867	2.67816	0.766302
PATH:00120	Primary bile acid biosynthesis	1	87	16	7456	0.171371	0.399867	5.35632	0.766061
PATH:05214	Glioma	2	87	65	7456	0.175447	0.402979	2.63696	0.755855
PATH:04270	Vascular smooth muscle contraction	3	87	128	7456	0.187649	0.424375	2.00862	0.726654
PATH:04720	Long-term potentiation	2	87	69	7456	0.192282	0.428264	2.48409	0.716062
PATH:05212	Pancreatic cancer	2	87	70	7456	0.196525	0.431181	2.4486	0.706583
PATH:05218	Melanoma	2	87	71	7456	0.20078	0.434039	2.41412	0.69728
PATH:04120	Ubiquitin mediated proteolysis	3	87	136	7456	0.21161	0.442259	1.89047	0.674464
PATH:05412	Arrhythmogenic right ventricular cardiomyopathy (ARVC)	2	87	74	7456	0.213608	0.442259	2.31625	0.670382
PATH:04260	Cardiac muscle contraction	2	87	74	7456	0.213608	0.442259	2.31625	0.670382
PATH:01230	Biosynthesis of amino acids	2	87	77	7456	0.226515	0.457417	2.226	0.644904
PATH:04370	VEGF signaling pathway	2	87	78	7456	0.230831	0.457417	2.19747	0.636706
PATH:04080	Neuroactive ligand-receptor interaction	5	87	282	7456	0.232332	0.457417	1.51952	0.633891
PATH:04612	Antigen processing and presentation	2	87	79	7456	0.235152	0.457417	2.16965	0.628651
PATH:00910	Nitrogen metabolism	1	87	23	7456	0.236891	0.457417	3.72614	0.625452
PATH:04932	Non-alcoholic fatty liver disease (NAFLD)	3	87	146	7456	0.242439	0.457417	1.76098	0.615397
PATH:04070	Phosphatidylinositol signaling system	2	87	81	7456	0.24381	0.457417	2.11608	0.612948
PATH:03060	Protein export	1	87	24	7456	0.245823	0.457417	3.57088	0.609378
PATH:05410	Hypertrophic cardiomyopathy (HCM)	2	87	84	7456	0.256822	0.47191	2.0405	0.590368
PATH:00534	Glycosaminoglycan biosynthesis - heparan sulfate / heparin	1	87	26	7456	0.263377	0.477981	3.2962	0.579422
PATH:04630	Jak-STAT signaling pathway	3	87	155	7456	0.270792	0.479507	1.65873	0.567364
PATH:05222	Small cell lung cancer	2	87	88	7456	0.274191	0.479507	1.94775	0.561947
PATH:05215	Prostate cancer	2	87	89	7456	0.278533	0.479507	1.92587	0.555123
PATH:04666	Fc gamma R-mediated phagocytosis	2	87	89	7456	0.278533	0.479507	1.92587	0.555123
PATH:00512	Mucin type O-Glycan biosynthesis	1	87	28	7456	0.280528	0.479507	3.06076	0.552024
PATH:00030	Pentose phosphate pathway	1	87	29	7456	0.288955	0.488234	2.95521	0.53917
PATH:00630	Glyoxylate and dicarboxylate metabolism	1	87	30	7456	0.297284	0.4966	2.8567	0.526828
PATH:00230	Purine metabolism	3	87	171	7456	0.321978	0.531807	1.50353	0.492173
PATH:04130	SNARE interactions in vesicular transport	1	87	35	7456	0.337505	0.551258	2.4486	0.47172
PATH:04066	HIF-1 signaling pathway	2	87	109	7456	0.364428	0.580958	1.5725	0.438388
PATH:04668	TNF signaling pathway	2	87	109	7456	0.364428	0.580958	1.5725	0.438388
PATH:04660	T cell receptor signaling pathway	2	87	110	7456	0.368641	0.580958	1.5582	0.433396
PATH:00051	Fructose and mannose metabolism	1	87	40	7456	0.375449	0.580958	2.14253	0.425449
PATH:04140	Regulation of autophagy	1	87	40	7456	0.375449	0.580958	2.14253	0.425449
PATH:05219	Bladder cancer	1	87	42	7456	0.390018	0.594248	2.0405	0.408916
PATH:05146	Amoebiasis	2	87	118	7456	0.401943	0.594248	1.45256	0.395835
PATH:04670	Leukocyte transendothelial migration	2	87	118	7456	0.401943	0.594248	1.45256	0.395835
PATH:04962	Vasopressin-regulated water reabsorption	1	87	44	7456	0.40425	0.594248	1.94775	0.39335
PATH:04960	Aldosterone-regulated sodium reabsorption	1	87	44	7456	0.40425	0.594248	1.94775	0.39335
PATH:04973	Carbohydrate digestion and absorption	1	87	45	7456	0.411243	0.598542	1.90447	0.385901
PATH:00514	Other types of O-glycan biosynthesis	1	87	49	7456	0.438412	0.620323	1.749	0.358118
PATH:05030	Cocaine addiction	1	87	49	7456	0.438412	0.620323	1.749	0.358118
PATH:04380	Osteoclast differentiation	2	87	128	7456	0.442397	0.620323	1.33908	0.354188
PATH:00510	N-Glycan biosynthesis	1	87	50	7456	0.445008	0.620323	1.71402	0.351632
PATH:04728	Dopaminergic synapse	2	87	130	7456	0.450312	0.620323	1.31848	0.346487
PATH:00310	Lysine degradation	1	87	51	7456	0.451528	0.620323	1.68041	0.345316
PATH:04530	Tight junction	2	87	134	7456	0.465954	0.634215	1.27912	0.331657
PATH:04340	Hedgehog signaling pathway	1	87	54	7456	0.470636	0.634711	1.58706	0.327315
PATH:05160	Hepatitis C	2	87	137	7456	0.477515	0.638134	1.25111	0.321013
PATH:05223	Non-small cell lung cancer	1	87	56	7456	0.483007	0.639658	1.53038	0.316046
PATH:05205	Proteoglycans in cancer	3	87	226	7456	0.494177	0.648607	1.13763	0.306117
PATH:00010	Glycolysis / Gluconeogenesis	1	87	62	7456	0.518433	0.674421	1.38228	0.285308
PATH:05140	Leishmaniasis	1	87	65	7456	0.535234	0.690171	1.31848	0.271456
PATH:05031	Amphetamine addiction	1	87	69	7456	0.556738	0.711657	1.24205	0.254349
PATH:04920	Adipocytokine signaling pathway	1	87	71	7456	0.567119	0.713244	1.20706	0.246326
PATH:05220	Chronic myeloid leukemia	1	87	73	7456	0.577259	0.713244	1.17399	0.23863
PATH:04151	PI3K-Akt signaling pathway	4	87	346	7456	0.579712	0.713244	0.990765	0.236788
PATH:04917	Prolactin signaling pathway	1	87	74	7456	0.58224	0.713244	1.15812	0.234898
PATH:04520	Adherens junction	1	87	74	7456	0.58224	0.713244	1.15812	0.234898
PATH:04662	B cell receptor signaling pathway	1	87	76	7456	0.59203	0.719142	1.12765	0.227657
PATH:05100	Bacterial invasion of epithelial cells	1	87	77	7456	0.596839	0.719142	1.113	0.224143
PATH:05202	Transcriptional misregulation in cancer	2	87	175	7456	0.610119	0.723401	0.979442	0.214586
PATH:03320	PPAR signaling pathway	1	87	81	7456	0.615523	0.723401	1.05804	0.210756
PATH:05206	MicroRNAs in cancer	3	87	270	7456	0.615595	0.723401	0.952235	0.210705
PATH:04664	Fc epsilon RI signaling pathway	1	87	82	7456	0.620058	0.723401	1.04514	0.207568
PATH:04640	Hematopoietic cell lineage	1	87	85	7456	0.63335	0.73309	1.00825	0.198356
PATH:04974	Protein digestion and absorption	1	87	89	7456	0.650359	0.745812	0.962934	0.186847
PATH:04512	ECM-receptor interaction	1	87	90	7456	0.654488	0.745812	0.952235	0.184098
PATH:04620	Toll-like receptor signaling pathway	1	87	101	7456	0.696846	0.787972	0.848526	0.156863
PATH:01200	Carbon metabolism	1	87	109	7456	0.724386	0.81286	0.786249	0.14003
PATH:05203	Viral carcinogenesis	2	87	226	7456	0.746228	0.831027	0.758417	0.127128
PATH:04650	Natural killer cell mediated cytotoxicity	1	87	124	7456	0.769524	0.850526	0.691138	0.113778
PATH:05012	Parkinson's disease	1	87	129	7456	0.782881	0.855277	0.66435	0.106305
PATH:05145	Toxoplasmosis	1	87	130	7456	0.785459	0.855277	0.65924	0.104877
PATH:05162	Measles	1	87	137	7456	0.802677	0.867599	0.625556	0.0954592
PATH:04726	Serotonergic synapse	1	87	144	7456	0.818528	0.878275	0.595147	0.0869664
PATH:04390	Hippo signaling pathway	1	87	153	7456	0.837071	0.889329	0.560138	0.0772378
PATH:04514	Cell adhesion molecules (CAMs)	1	87	155	7456	0.84093	0.889329	0.552911	0.0752402
PATH:04145	Phagosome	1	87	169	7456	0.865527	0.90093	0.507107	0.0627195
PATH:05164	Influenza A	1	87	170	7456	0.867132	0.90093	0.504124	0.0619147
PATH:05016	Huntington's disease	1	87	172	7456	0.870286	0.90093	0.498262	0.0603378
PATH:05152	Tuberculosis	1	87	178	7456	0.879312	0.903908	0.481467	0.055857
PATH:05034	Alcoholism	1	87	195	7456	0.901649	0.920433	0.439493	0.0449625
PATH:05169	Epstein-Barr virus infection	1	87	208	7456	0.915925	0.928559	0.412025	0.03814
PATH:04060	Cytokine-cytokine receptor interaction	1	87	260	7456	0.955231	0.961773	0.32962	0.0198918
PATH:01100	Metabolic pathways	7	87	1188	7456	0.990301	0.990301	0.504973	0.00423277
